# Supplementary material
Source: publisher figshare collection journal article supplement (https://tandf.figshare.com/ndownloader/files/31595281)
Supplement: Supplementary file 1 [file 31595281]

## Sheet: case1-VS-case2.DEseq2_Method.Ge
Data File S1. List of differentially expressed genes (DEGs) in amino acid starvation (case2) relative to nitrogen starvation (case1).
GeneID	Length	case1-Expression	case2-Expression	log2FoldChange(case2/case1)	Padj	Up/Down-Regulation	Pvalue	Cellular Component	Molecular Function	Biological Process	Kegg Orthology	Nr Description
BK006948.2_mrna_5360	1134	4068.7	888.202	-2.19561	6.93e-14	Down	2.23e-15	GO:0034399//nuclear periphery;GO:0005829//cytosol;GO:0005737//cytoplasm	GO:0030060//L-malate dehydrogenase activity	GO:0006099//tricarboxylic acid cycle;GO:0006094//gluconeogenesis;GO:0005975//carbohydrate metabolic process;GO:0016558//protein import into peroxisome matrix;GO:0006108//malate metabolic process	K00026//malate dehydrogenase [EC:1.1.1.37]	AAC49466.1//malate dehydrogenase [Saccharomyces cerevisiae]
BK006948.2_mrna_5453	321	1203.3	5477.65	2.18656	1.42e-23	Up	2.15e-25	GO:0005840//ribosome;GO:0022625//cytosolic large ribosomal subunit	GO:0003735//structural constituent of ribosome	GO:0002181//cytoplasmic translation;GO:0006414//translational elongation	K02943//large subunit ribosomal protein LP2	XP_018221749.1//RPP2A-like protein [Saccharomyces eubayanus]
BK006936.2_mrna_123	393	3275.8	16854.4	2.36321	4.89e-27	Up	4.83e-29	GO:0005840//ribosome;GO:0022625//cytosolic large ribosomal subunit	GO:0003735//structural constituent of ribosome	GO:0006412//translation;GO:0002181//cytoplasmic translation	K02912//large subunit ribosomal protein L32e	NP_009460.1//ribosomal 60S subunit protein L32 [Saccharomyces cerevisiae S288C]
BK006936.2_mrna_188	570	4891.49	17293.6	1.82189	1.32e-14	Up	4.05e-16	GO:0022625//cytosolic large ribosomal subunit	GO:0003723//RNA binding;GO:0003735//structural constituent of ribosome	GO:0006412//translation;GO:0002181//cytoplasmic translation	K02885//large subunit ribosomal protein L19e	NP_009526.1//ribosomal 60S subunit protein L19B [Saccharomyces cerevisiae S288C]
BK006944.2_mrna_3613	720	1188.4	3880.67	1.70728	1.45e-08	Up	6.67e-10	NA	NA	NA	K01183//chitinase [EC:3.2.1.14]	SCU92262.1//LAFA_0F09142g1_1 [Lachancea sp. CBS 6924]
BK006947.3_mrna_5116	1665	2383.83	672.448	-1.82578	1.33e-18	Down	3.33e-20	GO:0005829//cytosol;GO:0005782//peroxisomal matrix;GO:0005777//peroxisome;GO:0009514//glyoxysome;GO:0005737//cytoplasm	GO:0004474//malate synthase activity	GO:0006099//tricarboxylic acid cycle;GO:0006097//glyoxylate cycle	K01638//malate synthase [EC:2.3.3.9]	NP_014282.1//malate synthase MLS1 [Saccharomyces cerevisiae S288C]
BK006936.2_mrna_171	1920	4023.8	1634.14	-1.30003	4.42e-09	Down	1.92e-10	GO:0000324//fungal-type vacuole;GO:0016021//integral component of membrane;GO:0071944//cell periphery;GO:0005886//plasma membrane	GO:0015213//uridine transmembrane transporter activity;GO:0015205//nucleobase transmembrane transporter activity	GO:0055085//transmembrane transport;GO:0015862//uridine transport	K03457//nucleobase:cation symporter-1, NCS1 family	NP_009511.1//uridine permease [Saccharomyces cerevisiae S288C]
BK006945.2_mrna_3834	1239	1307.58	4459.54	1.76999	1.4e-07	Up	7.06e-09	GO:0005737//cytoplasm	GO:0046872//metal ion binding;GO:0000908//taurine dioxygenase activity;GO:0000907//sulfonate dioxygenase activity;GO:0016491//oxidoreductase activity	GO:0046306//alkanesulfonate catabolic process;GO:0044273//sulfur compound catabolic process	K19245//sulfonate dioxygenase [EC:1.14.11.-]	NP_013043.1//sulfonate dioxygenase [Saccharomyces cerevisiae S288C]
BK006941.2_mrna_1984	1131	1729.99	3704.16	1.09839	0.0051122	Up	0.000627153	GO:0005783//endoplasmic reticulum;GO:0005887//integral component of plasma membrane;GO:0016021//integral component of membrane;GO:0071944//cell periphery;GO:0005886//plasma membrane	GO:0000006//high-affinity zinc transmembrane transporter activity;GO:0005385//zinc ion transmembrane transporter activity	GO:0071578//zinc ion import across plasma membrane;GO:0071577//zinc ion transmembrane transport	K14709//solute carrier family 39 (zinc transporter), member 1/2/3	NP_011259.1//high-affinity Zn(2+) transporter ZRT1 [Saccharomyces cerevisiae S288C]
BK006935.2_mrna_90	225	19.6521	45.9338	1.22487	0.0205333	Up	0.00342279	GO:0005783//endoplasmic reticulum;GO:0005794//Golgi apparatus;GO:0016021//integral component of membrane;GO:0005886//plasma membrane;GO:0005737//cytoplasm	NA	GO:0016050//vesicle organization	NA	NP_009416.1//DUP240 family protein [Saccharomyces cerevisiae S288C]
BK006938.2_mrna_1266	1050	4281.9	2005.28	-1.09444	1.79e-10	Down	7e-12	GO:0016021//integral component of membrane;GO:0005789//endoplasmic reticulum membrane	GO:0042284//sphingolipid delta-4 desaturase activity;GO:0000170//sphingosine hydroxylase activity;GO:0005506//iron ion binding;GO:0016491//oxidoreductase activity	GO:0006665//sphingolipid metabolic process;GO:0006675//mannosyl-inositol phosphorylceramide metabolic process;GO:0030148//sphingolipid biosynthetic process;GO:0008610//lipid biosynthetic process	K04713//sphinganine C4-monooxygenase [EC:1.14.18.5]	NP_010583.1//sphingosine hydroxylase [Saccharomyces cerevisiae S288C]
BK006945.2_mrna_4296	393	494.811	2362.42	2.25532	2.25e-29	Up	1.81e-31	GO:0005840//ribosome;GO:0022627//cytosolic small ribosomal subunit	GO:0003735//structural constituent of ribosome	GO:0006412//translation;GO:0002181//cytoplasmic translation	K02957//small subunit ribosomal protein S15Ae	NP_013471.1//ribosomal 40S subunit protein S22B [Saccharomyces cerevisiae S288C]
BK006939.2_mrna_1526	588	1094.64	516.777	-1.08284	9.07e-11	Down	3.46e-12	GO:0005634//nucleus;GO:0005739//mitochondrion;GO:0005737//cytoplasm	GO:0016746//transferase activity, transferring acyl groups;GO:0004402//histone acetyltransferase activity;GO:0047812//D-amino-acid N-acetyltransferase activity;GO:0008080//N-acetyltransferase activity	GO:0046416//D-amino acid metabolic process;GO:0006473//protein acetylation;GO:0070458//cellular detoxification of nitrogen compound	K18852//D-amino-acid N-acetyltransferase [EC:2.3.1.36]	NP_010847.1//hypothetical protein YEL067C [Saccharomyces cerevisiae S288C]
BK006937.2_mrna_608	1383	7410.82	54316	2.87367	4.66e-46	Up	1.4e-48	GO:0005759//mitochondrial matrix;GO:0005777//peroxisome;GO:0005739//mitochondrion;GO:0005737//cytoplasm	GO:0004108//citrate (Si)-synthase activity	GO:0006099//tricarboxylic acid cycle;GO:0006101//citrate metabolic process;GO:0006097//glyoxylate cycle;GO:0006537//glutamate biosynthetic process;GO:0005975//carbohydrate metabolic process	K01647//citrate synthase [EC:2.3.3.1]	NP_009931.1//citrate (Si)-synthase CIT2 [Saccharomyces cerevisiae S288C]
BK006941.2_mrna_2517	1371	312.85	111.549	-1.48779	7.89e-06	Down	5.24e-07	GO:0005634//nucleus;GO:0000790//nuclear chromatin	GO:0000978//RNA polymerase II proximal promoter sequence-specific DNA binding;GO:0043565//sequence-specific DNA binding;GO:0003700//DNA-binding transcription factor activity	GO:0007124//pseudohyphal growth;GO:0061408//positive regulation of transcription from RNA polymerase II promoter in response to heat stress;GO:0034605//cellular response to heat	K09419//heat shock transcription factor, other eukaryote	NP_011765.1//Mga1p [Saccharomyces cerevisiae S288C]
BK006936.2_mrna_523	1425	5429.27	11495.3	1.08221	0.0149295	Up	0.00229626	GO:0000329//fungal-type vacuole membrane;GO:0005783//endoplasmic reticulum;GO:0016021//integral component of membrane	GO:0015174//basic amino acid transmembrane transporter activity	GO:0090513//L-histidine transmembrane import into vacuole;GO:0015802//basic amino acid transport;GO:0055085//transmembrane transport;GO:1990591//asparagine transmembrane import into vacuole;GO:0110101//L-valine transmembrane import into vacuole;GO:0090517//L-lysine transmembrane import into vacuole;GO:0090518//L-arginine transmembrane import into vacuole	K22134//MFS transporter, DHA2 family, glioxin efflux transporter;K10866//DNA repair protein RAD50 [EC:3.6.-.-]	NP_009852.3//Vba2p [Saccharomyces cerevisiae S288C]
BK006948.2_mrna_5838	471	272.2	104.841	-1.37646	9.56e-08	Down	4.74e-09	GO:0005634//nucleus;GO:0005737//cytoplasm	GO:0061630//ubiquitin protein ligase activity;GO:0005524//ATP binding;GO:0016740//transferase activity;GO:0061631//ubiquitin conjugating enzyme activity;GO:0004842//ubiquitin-protein transferase activity	GO:1902426//deactivation of mitotic spindle assembly checkpoint;GO:0006511//ubiquitin-dependent protein catabolic process;GO:0006513//protein monoubiquitination;GO:0031145//anaphase-promoting complex-dependent catabolic process;GO:0000209//protein polyubiquitination	K06688//ubiquitin-conjugating enzyme E2 C [EC:2.3.2.23]	NP_014984.3//putative E2 ubiquitin-protein ligase UBC11 [Saccharomyces cerevisiae S288C]
BK006934.2_mrna_2756	306	104.712	47.4076	-1.14324	0.00843199	Down	0.00114873	NA	NA	NA	NA	NP_001335740.1//hypothetical protein YHR125W [Saccharomyces cerevisiae S288C]
BK006946.2_mrna_4663	348	3716.92	607.84	-2.61234	1.28e-06	Down	7.53e-08	NA	NA	NA	NA	NP_013825.1//Spg4p [Saccharomyces cerevisiae S288C]
BK006936.2_mrna_164	417	1828.38	539.287	-1.76144	4.74e-15	Down	1.43e-16	NA	GO:0046872//metal ion binding	NA	K15428//Cys-Gly metallodipeptidase DUG1 [EC:3.4.13.-]	NP_009504.1//Moh1p [Saccharomyces cerevisiae S288C]
BK006941.2_mrna_2283	384	1292.95	7975.65	2.62493	5.74e-34	Up	3.08e-36	GO:0015934//large ribosomal subunit;GO:0022625//cytosolic large ribosomal subunit	GO:0003723//RNA binding;GO:0003735//structural constituent of ribosome	GO:0006412//translation;GO:0002181//cytoplasmic translation;GO:0042273//ribosomal large subunit biogenesis	K02898//large subunit ribosomal protein L26e	NP_011548.2//ribosomal 60S subunit protein L26B [Saccharomyces cerevisiae S288C]
BK006949.2_mrna_6072	1002	2656.04	358.667	-2.88856	4e-63	Down	9.37e-66	GO:0005634//nucleus;GO:0005829//cytosol;GO:0043332//mating projection tip;GO:0005737//cytoplasm	GO:0046872//metal ion binding;GO:0008270//zinc ion binding;GO:0004053//arginase activity;GO:0090369//ornithine carbamoyltransferase inhibitor activity;GO:0030145//manganese ion binding	GO:0006525//arginine metabolic process;GO:0090368//regulation of ornithine metabolic process;GO:0019547//arginine catabolic process to ornithine;GO:0000050//urea cycle	K01476//arginase [EC:3.5.3.1]	NP_015214.1//arginase [Saccharomyces cerevisiae S288C]
BK006946.2_mrna_4513	411	3060.12	12788	2.06313	4.4e-19	Up	1.07e-20	GO:0005840//ribosome;GO:0022627//cytosolic small ribosomal subunit	GO:0003735//structural constituent of ribosome	GO:0000028//ribosomal small subunit assembly;GO:0006412//translation;GO:0002181//cytoplasmic translation	K02962//small subunit ribosomal protein S17e	NP_013688.1//ribosomal 40S subunit protein S17A [Saccharomyces cerevisiae S288C]
BK006940.2_mrna_1842	1127	1763.28	3620.46	1.03792	0.00193952	Up	0.000210344	NA	GO:0018456//aryl-alcohol dehydrogenase (NAD+) activity	GO:0006081//cellular aldehyde metabolic process	K17647//versiconal hemiacetal acetate reductase [EC:1.1.1.353];K07005//uncharacterized protein	P43547.1//PUTATIVE PSEUDOGENE: RecName: Full=Putative aryl-alcohol dehydrogenase AAD6
BK006946.2_mrna_4672	960	2190.65	14910.1	2.76687	1.55e-34	Up	8.03e-37	GO:0005634//nucleus;GO:0005829//cytosol;GO:0022627//cytosolic small ribosomal subunit;GO:0005737//cytoplasm	GO:0043022//ribosome binding;GO:0005080//protein kinase C binding;GO:0001965//G-protein alpha-subunit binding;GO:0005092//GDP-dissociation inhibitor activity;GO:0019899//enzyme binding	GO:0060733//regulation of eIF2 alpha phosphorylation by amino acid starvation;GO:0007186//G protein-coupled receptor signaling pathway;GO:0000747//conjugation with cellular fusion;GO:0032995//regulation of fungal-type cell wall biogenesis;GO:0031954//positive regulation of protein autophosphorylation;GO:0072344//rescue of stalled ribosome;GO:0001403//invasive growth in response to glucose limitat…	K14753//guanine nucleotide-binding protein subunit beta-2-like 1 protein	NP_013834.1//guanine nucleotide-binding protein subunit beta [Saccharomyces cerevisiae S288C]
BK006949.2_mrna_6281	525	3521.2	13686.7	1.95863	3.12e-21	Up	6.12e-23	GO:0005840//ribosome;GO:0005634//nucleus;GO:0022625//cytosolic large ribosomal subunit	GO:0003735//structural constituent of ribosome;GO:0019843//rRNA binding	GO:0006412//translation;GO:0000027//ribosomal large subunit assembly;GO:0002181//cytoplasmic translation	K02868//large subunit ribosomal protein L11e	NP_015427.1//ribosomal 60S subunit protein L11A [Saccharomyces cerevisiae S288C]
BK006948.2_mrna_5874	1560	13943.8	4435.72	-1.65238	1.72e-08	Down	8.01e-10	GO:0042645//mitochondrial nucleoid;GO:0005739//mitochondrion	GO:0016620//oxidoreductase activity, acting on the aldehyde or oxo group of donors, NAD or NADP as acceptor;GO:0043878//glyceraldehyde-3-phosphate dehydrogenase (NAD+) (non-phosphorylating) activity;GO:0004030//aldehyde dehydrogenase [NAD(P)+] activity;GO:0004029//aldehyde dehydrogenase (NAD) activity	GO:0006067//ethanol metabolic process;GO:0006090//pyruvate metabolic process;GO:0006740//NADPH regeneration;GO:0019413//acetate biosynthetic process	K00128//aldehyde dehydrogenase (NAD+) [EC:1.2.1.3]	NP_015019.1//aldehyde dehydrogenase (NADP(+)) ALD4 [Saccharomyces cerevisiae S288C]
BK006945.2_mrna_4222	1983	12759.1	3970.11	-1.68427	3.77e-11	Down	1.4e-12	GO:0005774//vacuolar membrane;GO:0000324//fungal-type vacuole;GO:0016021//integral component of membrane	GO:0000048//peptidyltransferase activity;GO:0103068//leukotriene C4 gamma-glutamyl transferase activity;GO:0102953//hypoglycin A gamma-glutamyl transpeptidase activity;GO:0036374//glutathione hydrolase activity	GO:0006536//glutamate metabolic process;GO:0006749//glutathione metabolic process;GO:0006751//glutathione catabolic process;GO:0006520//cellular amino acid metabolic process;GO:0006805//xenobiotic metabolic process;GO:0019344//cysteine biosynthetic process	K00681//gamma-glutamyltranspeptidase / glutathione hydrolase [EC:2.3.2.2 3.4.19.13]	NP_013402.1//gamma-glutamyltransferase [Saccharomyces cerevisiae S288C]
BK006940.2_mrna_1890	1641	34.8077	14.2722	-1.2862	0.033608	Down	0.0064741	GO:0016021//integral component of membrane;GO:0005886//plasma membrane	GO:0005355//glucose transmembrane transporter activity;GO:0015146//pentose transmembrane transporter activity;GO:0022857//transmembrane transporter activity	NA	K08139//MFS transporter, SP family, sugar:H+ symporter	KZV11590.1//HXT10 [Saccharomyces cerevisiae]
BK006939.2_mrna_1743	345	557.157	235.317	-1.24347	3.01e-07	Down	1.61e-08	NA	NA	NA	NA	NP_011047.3//hypothetical protein YER121W [Saccharomyces cerevisiae S288C]
BK006942.2_mrna_3019	570	832.406	247.228	-1.75145	2.15e-14	Down	6.68e-16	NA	NA	NA	NA	NP_012240.3//hypothetical protein YIL024C [Saccharomyces cerevisiae S288C]
BK006946.2_mrna_4469	768	6615.56	34433.5	2.37988	5.05e-25	Up	6.21e-27	GO:0030686//90S preribosome;GO:0005829//cytosol;GO:0022627//cytosolic small ribosomal subunit	GO:0003735//structural constituent of ribosome	GO:0000462//maturation of SSU-rRNA from tricistronic rRNA transcript (SSU-rRNA, 5.8S rRNA, LSU-rRNA);GO:0006412//translation;GO:0002181//cytoplasmic translation	K02984//small subunit ribosomal protein S3Ae	NP_013648.1//ribosomal 40S subunit protein S1B [Saccharomyces cerevisiae S288C]
BK006934.2_mrna_2770	345	4146.77	1729.98	-1.26123	2.16e-07	Down	1.13e-08	NA	GO:0004866//endopeptidase inhibitor activity	GO:0042144//vacuole fusion, non-autophagic	NA	NP_012006.1//hypothetical protein YHR138C [Saccharomyces cerevisiae S288C]
BK006944.2_mrna_3548	978	824.578	2519.81	1.61159	0.00476092	Up	0.000576091	GO:0009277//fungal-type cell wall;GO:0005576//extracellular region	GO:0005199//structural constituent of cell wall	GO:0031505//fungal-type cell wall organization	K22020//mucin-19	NP_012758.1//beta-1,3-glucan linked protein [Saccharomyces cerevisiae S288C]
BK006948.2_mrna_5355	327	396.479	74.1688	-2.41836	1.27e-16	Down	3.52e-18	NA	NA	NA	NA	NP_014510.1//hypothetical protein YOL131W [Saccharomyces cerevisiae S288C]
BK006944.2_mrna_3529	921	506.345	1128.23	1.15586	3.34e-11	Up	1.23e-12	GO:0005634//nucleus;GO:0005737//cytoplasm	NA	NA	NA	NP_012738.1//Lot5p [Saccharomyces cerevisiae S288C]
BK006949.2_mrna_6188	1728	1852.11	851.421	-1.12123	1.34e-10	Down	5.24e-12	GO:0005759//mitochondrial matrix;GO:0005739//mitochondrion	GO:0046872//metal ion binding;GO:0046421//methylisocitrate lyase activity;GO:0004451//isocitrate lyase activity	GO:0019752//carboxylic acid metabolic process;GO:0019629//propionate catabolic process, 2-methylcitrate cycle	K01637//isocitrate lyase [EC:4.1.3.1]	NP_015331.1//methylisocitrate lyase ICL2 [Saccharomyces cerevisiae S288C]
BK006936.2_mrna_430	204	522.763	184.086	-1.50578	4.27e-12	Down	1.52e-13	GO:0016021//integral component of membrane	NA	NA	NA	NP_001032571.3//hypothetical protein YBR201C-A [Saccharomyces cerevisiae S288C]
BK006939.2_mrna_1739	414	3676.66	17426.5	2.24481	6.98e-24	Up	9.81e-26	GO:0005840//ribosome;GO:0005634//nucleus;GO:0005829//cytosol;GO:0022625//cytosolic large ribosomal subunit	GO:0003735//structural constituent of ribosome;GO:0070180//large ribosomal subunit rRNA binding	GO:0006412//translation;GO:0002181//cytoplasmic translation	K02894//large subunit ribosomal protein L23e	NP_009466.1//ribosomal 60S subunit protein L23A [Saccharomyces cerevisiae S288C]
BK006934.2_mrna_2768	447	197.102	83.8883	-1.2324	1.4e-05	Down	9.59e-07	GO:0005737//cytoplasm	GO:0004860//protein kinase inhibitor activity;GO:0004857//enzyme inhibitor activity	GO:0006623//protein targeting to vacuole	NA	NP_012004.1//Spl2p [Saccharomyces cerevisiae S288C]
BK006938.2_mrna_746	954	384.701	144.218	-1.41549	2.31e-09	Down	9.85e-11	GO:0016021//integral component of membrane;GO:0005737//cytoplasm	NA	NA	NA	NP_010063.1//hypothetical protein YDL218W [Saccharomyces cerevisiae S288C]
BK006936.2_mrna_406	711	2945.02	11836.2	2.00685	4.22e-21	Up	8.55e-23	GO:0005840//ribosome;GO:0005654//nucleoplasm;GO:0030686//90S preribosome;GO:0032040//small-subunit processome;GO:0005730//nucleolus;GO:0022627//cytosolic small ribosomal subunit;GO:0005737//cytoplasm	GO:0003735//structural constituent of ribosome	GO:0031167//rRNA methylation;GO:0000462//maturation of SSU-rRNA from tricistronic rRNA transcript (SSU-rRNA, 5.8S rRNA, LSU-rRNA);GO:0006412//translation;GO:0002181//cytoplasmic translation	K02991//small subunit ribosomal protein S6e	NP_015235.1//ribosomal 40S subunit protein S6A [Saccharomyces cerevisiae S288C]
BK006942.2_mrna_2976	408	1269.38	6886.64	2.43967	2.66e-38	Up	1.25e-40	GO:0005840//ribosome;GO:0005739//mitochondrion;GO:0022627//cytosolic small ribosomal subunit	GO:0003735//structural constituent of ribosome	GO:0000462//maturation of SSU-rRNA from tricistronic rRNA transcript (SSU-rRNA, 5.8S rRNA, LSU-rRNA);GO:0006412//translation;GO:0002181//cytoplasmic translation	K02974//small subunit ribosomal protein S24e	NP_012195.1//ribosomal 40S subunit protein S24B [Saccharomyces cerevisiae S288C]
BK006944.2_mrna_3669	1101	5061.46	1530.12	-1.72591	1.19e-05	Down	8e-07	GO:0005634//nucleus	GO:0003677//DNA binding;GO:0043565//sequence-specific DNA binding;GO:0003700//DNA-binding transcription factor activity	GO:0045944//positive regulation of transcription by RNA polymerase II;GO:2000222//positive regulation of pseudohyphal growth	K12763//enhanced filamentous growth protein 1	NP_012881.1//Phd1p [Saccharomyces cerevisiae S288C]
BK006941.2_mrna_2371	438	5672.31	15281.1	1.42974	3.27e-14	Up	1.03e-15	GO:0022627//cytosolic small ribosomal subunit;GO:0015935//small ribosomal subunit	GO:0003735//structural constituent of ribosome	GO:0000462//maturation of SSU-rRNA from tricistronic rRNA transcript (SSU-rRNA, 5.8S rRNA, LSU-rRNA);GO:1990145//maintenance of translational fidelity;GO:0006412//translation;GO:0006450//regulation of translational fidelity	K02973//small subunit ribosomal protein S23e	NP_015457.1//ribosomal 40S subunit protein S23B [Saccharomyces cerevisiae S288C]
BK006941.2_mrna_2554	1422	3223.68	1453.94	-1.14874	3.63e-11	Down	1.34e-12	GO:0005634//nucleus	GO:0000981//DNA-binding transcription factor activity, RNA polymerase II-specific;GO:0003677//DNA binding;GO:0008270//zinc ion binding;GO:0003700//DNA-binding transcription factor activity	GO:0000023//maltose metabolic process;GO:0006355//regulation of transcription, DNA-templated;GO:0006351//transcription, DNA-templated;GO:0044262//cellular carbohydrate metabolic process	K01182//oligo-1,6-glucosidase [EC:3.2.1.10];K21450//arabinolytic transcriptional activator AraR;K08141//MFS transporter, SP family, general alpha glucoside:H+ symporter;K21451//xylanolytic transcriptional activator XlnR	NP_011804.1//transcription factor MAL13 [Saccharomyces cerevisiae S288C]
BK006947.3_mrna_5038	897	622.192	273.846	-1.184	1.57e-07	Down	8.01e-09	GO:0036396//RNA N6-methyladenosine methyltransferase complex;GO:0005730//nucleolus;GO:0005737//cytoplasm	NA	GO:0030435//sporulation resulting in formation of a cellular spore;GO:0051321//meiotic cell cycle;GO:2000221//negative regulation of pseudohyphal growth;GO:0080009//mRNA methylation	NA	NP_014203.1//Slz1p [Saccharomyces cerevisiae S288C]
BK006948.2_mrna_5814	519	4764.03	20761.3	2.12364	3.66e-22	Up	6.69e-24	GO:0005840//ribosome;GO:0022625//cytosolic large ribosomal subunit	GO:0003735//structural constituent of ribosome	GO:0006412//translation;GO:0002181//cytoplasmic translation	K02882//large subunit ribosomal protein L18Ae	EDN64179.1//ribosomal protein L20A [Saccharomyces cerevisiae YJM789]
BK006939.2_mrna_1720	1539	2140.38	766.528	-1.48145	4.2e-13	Down	1.4e-14	GO:0005737//cytoplasm;GO:0005628//prospore membrane	GO:0008047//enzyme activator activity	GO:0006031//chitin biosynthetic process;GO:0030437//ascospore formation;GO:0071555//cell wall organization	K07126//uncharacterized protein	NP_011022.1//Shc1p [Saccharomyces cerevisiae S288C]
BK006942.2_mrna_3025	765	3468.36	15124.4	2.12456	3.43e-22	Up	6.21e-24	GO:0005840//ribosome;GO:0022625//cytosolic large ribosomal subunit	GO:0003735//structural constituent of ribosome;GO:0019843//rRNA binding	GO:0006412//translation;GO:0002181//cytoplasmic translation	K02938//large subunit ribosomal protein L8e	NP_012246.1//ribosomal 60S subunit protein L2B [Saccharomyces cerevisiae S288C]
BK006948.2_mrna_5884	615	991.046	409.202	-1.27614	1.96e-06	Down	1.18e-07	NA	NA	NA	K22020//mucin-19	AJT87473.1//Fit3p [Saccharomyces cerevisiae YJM1083]
BK006936.2_mrna_432	2775	2474.23	1068.39	-1.21154	2.83e-10	Down	1.13e-11	GO:0005739//mitochondrion	NA	GO:0007165//signal transduction	K19898//alpha-agglutinin	NP_009762.2//Cos111p [Saccharomyces cerevisiae S288C]
BK006934.2_mrna_2822	1716	248.707	111.506	-1.15733	0.000393228	Down	3.44e-05	GO:0070056//prospore membrane leading edge;GO:0005628//prospore membrane	NA	GO:0030476//ascospore wall assembly;GO:0032120//ascospore-type prospore membrane assembly;GO:0051301//cell division	K12783//sporulation-specific protein 1	NP_012054.1//Ssp1p [Saccharomyces cerevisiae S288C]
BK006934.2_mrna_2773	720	1450.32	501.402	-1.53233	2.25e-10	Down	8.89e-12	GO:0005783//endoplasmic reticulum;GO:0016021//integral component of membrane;GO:0005789//endoplasmic reticulum membrane;GO:0005737//cytoplasm	NA	NA	NA	NP_012009.1//hypothetical protein YHR140W [Saccharomyces cerevisiae S288C]
BK006947.3_mrna_5089	1500	132873	24619.6	-2.43217	2.4e-12	Down	8.44e-14	GO:0005887//integral component of plasma membrane;GO:0016021//integral component of membrane;GO:0005886//plasma membrane	GO:0008519//ammonium transmembrane transporter activity	GO:0007124//pseudohyphal growth;GO:0019740//nitrogen utilization;GO:0015696//ammonium transport	K03320//ammonium transporter, Amt family	NP_014257.1//ammonium permease MEP2 [Saccharomyces cerevisiae S288C]
BK006941.2_mrna_2411	654	2425.49	901.003	-1.42867	7.9e-24	Down	1.14e-25	NA	NA	NA	NA	NP_011669.2//hypothetical protein YGR153W [Saccharomyces cerevisiae S288C]
BK006935.2_mrna_10	1374	4074.46	1265.7	-1.68667	1.87e-15	Down	5.45e-17	GO:0005634//nucleus;GO:0005829//cytosol;GO:0005739//mitochondrion	GO:0000166//nucleotide binding;GO:0016639//oxidoreductase activity, acting on the CH-NH2 group of donors, NAD or NADP as acceptor;GO:0004354//glutamate dehydrogenase (NADP+) activity	GO:0006520//cellular amino acid metabolic process;GO:0006537//glutamate biosynthetic process	K00262//glutamate dehydrogenase (NADP+) [EC:1.4.1.4]	EGA59856.1//Gdh3p [Saccharomyces cerevisiae FostersB]
BK006945.2_mrna_4232	906	357.12	177.036	-1.01237	0.00918024	Down	0.00128447	GO:0005631//chitosan layer of spore wall;GO:0005628//prospore membrane	GO:0004099//chitin deacetylase activity;GO:0016810//hydrolase activity, acting on carbon-nitrogen (but not peptide) bonds	GO:0030476//ascospore wall assembly;GO:0006032//chitin catabolic process;GO:0005975//carbohydrate metabolic process;GO:0000272//polysaccharide catabolic process	K01452//chitin deacetylase [EC:3.5.1.41]	NP_013410.1//chitin deacetylase CDA1 [Saccharomyces cerevisiae S288C]
BK006948.2_mrna_5452	429	2728.26	11705.5	2.10113	9.65e-19	Up	2.41e-20	GO:0022627//cytosolic small ribosomal subunit;GO:0015935//small ribosomal subunit	GO:0003723//RNA binding;GO:0003735//structural constituent of ribosome	GO:0000028//ribosomal small subunit assembly;GO:0006407//rRNA export from nucleus;GO:0006412//translation;GO:0002181//cytoplasmic translation	K02958//small subunit ribosomal protein S15e	NP_014602.1//ribosomal 40S subunit protein S15 [Saccharomyces cerevisiae S288C]
BK006934.2_mrna_2597	366	4403.55	19097.4	2.11664	3.03e-22	Up	5.28e-24	GO:0022627//cytosolic small ribosomal subunit;GO:0015935//small ribosomal subunit	GO:0003723//RNA binding;GO:0003729//mRNA binding;GO:0003735//structural constituent of ribosome	GO:0000462//maturation of SSU-rRNA from tricistronic rRNA transcript (SSU-rRNA, 5.8S rRNA, LSU-rRNA);GO:0006412//translation;GO:0002181//cytoplasmic translation	K02969//small subunit ribosomal protein S20e	NP_011848.1//ribosomal 40S subunit protein S20 [Saccharomyces cerevisiae S288C]
BK006942.2_mrna_2909	600	2010.93	9586.48	2.25314	4.96e-22	Up	9.38e-24	GO:0005840//ribosome;GO:0015934//large ribosomal subunit;GO:0022625//cytosolic large ribosomal subunit	GO:0003723//RNA binding;GO:0003729//mRNA binding;GO:0003735//structural constituent of ribosome	GO:0017148//negative regulation of translation;GO:0006412//translation;GO:0002181//cytoplasmic translation	K02872//large subunit ribosomal protein L13Ae	NP_012133.1//ribosomal 60S subunit protein L16A [Saccharomyces cerevisiae S288C]
BK006938.2_mrna_916	1689	2011.51	771.901	-1.3818	5.85e-18	Down	1.53e-19	GO:0030869//RENT complex;GO:0005724//nuclear telomeric heterochromatin;GO:0000784//nuclear chromosome, telomeric region;GO:0005730//nucleolus;GO:0034967//Set3 complex;GO:0005677//chromatin silencing complex;GO:0031618//nuclear pericentric heterochromatin;GO:0000790//nuclear chromatin;GO:0005720//nuclear heterochromatin	GO:0034739//histone deacetylase activity (H4-K16 specific);GO:0032041//NAD-dependent histone deacetylase activity (H3-K14 specific);GO:0017136//NAD-dependent histone deacetylase activity;GO:0046970//NAD-dependent histone deacetylase activity (H4-K16 specific);GO:0046872//metal ion binding;GO:0070403//NAD+ binding;GO:0046969//NAD-dependent histone deacetylase activity (H3-K9 specific);GO:0045129//…	GO:0034398//telomere tethering at nuclear periphery;GO:0030466//chromatin silencing at silent mating-type cassette;GO:0006333//chromatin assembly or disassembly;GO:1904524//negative regulation of DNA amplification;GO:0006348//chromatin silencing at telomere;GO:0045910//negative regulation of DNA recombination;GO:0001302//replicative cell aging;GO:0007062//sister chromatid cohesion;GO:0006325//chr…	K11121//NAD-dependent histone deacetylase SIR2 [EC:3.5.1.-]	NP_010242.1//NAD-dependent histone deacetylase SIR2 [Saccharomyces cerevisiae S288C]
BK006946.2_mrna_4641	1689	30630.1	3167.49	-3.27354	9.76e-130	Down	1.47e-132	GO:0000329//fungal-type vacuole membrane;GO:0016021//integral component of membrane	GO:0015174//basic amino acid transmembrane transporter activity	GO:0015802//basic amino acid transport;GO:0055085//transmembrane transport	K22134//MFS transporter, DHA2 family, glioxin efflux transporter;K10866//DNA repair protein RAD50 [EC:3.6.-.-]	NP_013806.1//Vba1p [Saccharomyces cerevisiae S288C]
BK006944.2_mrna_3772	264	1040.7	3385.09	1.70164	3.43e-15	Up	1.02e-16	GO:0005840//ribosome;GO:0022627//cytosolic small ribosomal subunit	GO:0003735//structural constituent of ribosome	GO:0006412//translation;GO:0000461//endonucleolytic cleavage to generate mature 3'-end of SSU-rRNA from (SSU-rRNA, 5.8S rRNA, LSU-rRNA);GO:0002181//cytoplasmic translation;GO:0000447//endonucleolytic cleavage in ITS1 to separate SSU-rRNA from 5.8S rRNA and LSU-rRNA from tricistronic rRNA transcript (SSU-rRNA, 5.8S rRNA, LSU-rRNA);GO:0006364//rRNA processing	K02971//small subunit ribosomal protein S21e	NP_012983.3//ribosomal 40S subunit protein S21A [Saccharomyces cerevisiae S288C]
BK006938.2_mrna_878	321	1750.15	6219.98	1.82943	1.07e-20	Up	2.24e-22	GO:0005840//ribosome;GO:0022625//cytosolic large ribosomal subunit	GO:0030295//protein kinase activator activity;GO:0003735//structural constituent of ribosome;GO:0043021//ribonucleoprotein complex binding	GO:0045860//positive regulation of protein kinase activity;GO:0002181//cytoplasmic translation;GO:0006414//translational elongation	K02942//large subunit ribosomal protein LP1	NP_010202.1//ribosomal protein P1A [Saccharomyces cerevisiae S288C]
BK006938.2_mrna_966	1089	3162.95	7102.38	1.16703	2.69e-07	Up	1.43e-08	GO:0005840//ribosome;GO:0005634//nucleus;GO:0022625//cytosolic large ribosomal subunit;GO:0005737//cytoplasm	GO:0003723//RNA binding;GO:0003735//structural constituent of ribosome	GO:0006412//translation;GO:0002181//cytoplasmic translation	K02930//large subunit ribosomal protein L4e	NP_010295.3//ribosomal 60S subunit protein L4B [Saccharomyces cerevisiae S288C]
BK006947.3_mrna_5224	228	2672.79	872.976	-1.61433	7.48e-09	Down	3.32e-10	GO:0005634//nucleus;GO:0000324//fungal-type vacuole;GO:0005829//cytosol;GO:0005737//cytoplasm	GO:0004867//serine-type endopeptidase inhibitor activity;GO:0004866//endopeptidase inhibitor activity	GO:0030162//regulation of proteolysis;GO:0042144//vacuole fusion, non-autophagic;GO:0015031//protein transport	NA	NP_014383.1//Pbi2p [Saccharomyces cerevisiae S288C]
BK006946.2_mrna_4511	441	3775.93	18889.5	2.32268	1.85e-26	Up	1.86e-28	GO:0005840//ribosome;GO:0005829//cytosol;GO:0005739//mitochondrion;GO:0022627//cytosolic small ribosomal subunit;GO:0005737//cytoplasm	GO:0003723//RNA binding;GO:0003735//structural constituent of ribosome;GO:0019843//rRNA binding	GO:0006407//rRNA export from nucleus;GO:0006412//translation;GO:0002181//cytoplasmic translation;GO:0000447//endonucleolytic cleavage in ITS1 to separate SSU-rRNA from 5.8S rRNA and LSU-rRNA from tricistronic rRNA transcript (SSU-rRNA, 5.8S rRNA, LSU-rRNA)	K02964//small subunit ribosomal protein S18e	NP_010738.1//ribosomal 40S subunit protein S18A [Saccharomyces cerevisiae S288C]
BK006949.2_mrna_6093	711	2933.78	12963.8	2.14366	1.26e-22	Up	2.09e-24	GO:0005840//ribosome;GO:0005654//nucleoplasm;GO:0030686//90S preribosome;GO:0032040//small-subunit processome;GO:0005730//nucleolus;GO:0022627//cytosolic small ribosomal subunit;GO:0005737//cytoplasm	GO:0003735//structural constituent of ribosome	GO:0031167//rRNA methylation;GO:0000462//maturation of SSU-rRNA from tricistronic rRNA transcript (SSU-rRNA, 5.8S rRNA, LSU-rRNA);GO:0006412//translation;GO:0002181//cytoplasmic translation	K02991//small subunit ribosomal protein S6e	NP_015235.1//ribosomal 40S subunit protein S6A [Saccharomyces cerevisiae S288C]
BK006938.2_mrna_1362	333	728.088	2646.16	1.86172	1.07e-20	Up	2.24e-22	GO:0005840//ribosome;GO:0000324//fungal-type vacuole;GO:0022625//cytosolic large ribosomal subunit	GO:0030295//protein kinase activator activity;GO:0003735//structural constituent of ribosome	GO:0045860//positive regulation of protein kinase activity;GO:0002181//cytoplasmic translation;GO:0006414//translational elongation	K02943//large subunit ribosomal protein LP2	NP_010670.3//ribosomal protein P2B [Saccharomyces cerevisiae S288C]
BK006945.2_mrna_4267	939	4343.99	18548.7	2.09422	1.75e-24	Up	2.29e-26	GO:0005840//ribosome;GO:0030686//90S preribosome;GO:0022625//cytosolic large ribosomal subunit;GO:0005737//cytoplasm	GO:0003735//structural constituent of ribosome;GO:0070180//large ribosomal subunit rRNA binding	GO:0042254//ribosome biogenesis;GO:0000027//ribosomal large subunit assembly;GO:0002181//cytoplasmic translation	K02941//large subunit ribosomal protein LP0	NP_013444.1//ribosomal protein P0 [Saccharomyces cerevisiae S288C]
BK006934.2_mrna_2652	885	39306.5	9373.81	-2.06806	2.39e-25	Down	2.76e-27	NA	GO:0016853//isomerase activity;GO:0003824//catalytic activity	GO:0009058//biosynthetic process;GO:0030968//endoplasmic reticulum unfolded protein response	K10599//pre-mRNA-processing factor 19 [EC:2.3.2.27]	NP_011894.1//Yhi9p [Saccharomyces cerevisiae S288C]
BK006946.2_mrna_4762	3267	19510.9	7629.21	-1.35468	5.42e-10	Down	2.24e-11	GO:0005737//cytoplasm	GO:0004573//mannosyl-oligosaccharide glucosidase activity	GO:0009311//oligosaccharide metabolic process	K01228//mannosyl-oligosaccharide glucosidase [EC:3.2.1.106]	NP_013923.1//hypothetical protein YMR196W [Saccharomyces cerevisiae S288C]
BK006944.2_mrna_3550	1302	1742.21	4654.81	1.4178	4.17e-10	Up	1.71e-11	GO:0005634//nucleus	GO:0004674//protein serine/threonine kinase activity;GO:0004693//cyclin-dependent protein serine/threonine kinase activity;GO:0005524//ATP binding;GO:0004672//protein kinase activity	GO:0006468//protein phosphorylation	K19847//MPK-like protein 1;K04464//mitogen-activated protein kinase 7 [EC:2.7.11.24]	KZV09776.1//KDX1 [Saccharomyces cerevisiae]
BK006944.2_mrna_3492	981	16562.8	7403.85	-1.1616	0.000350464	Down	3.04e-05	NA	GO:0000287//magnesium ion binding;GO:0003941//L-serine ammonia-lyase activity;GO:0018114//threonine racemase activity;GO:0008721//D-serine ammonia-lyase activity;GO:0030848//threo-3-hydroxyaspartate ammonia-lyase activity;GO:0030378//serine racemase activity;GO:0030170//pyridoxal phosphate binding	GO:0042866//pyruvate biosynthetic process;GO:0006520//cellular amino acid metabolic process;GO:0042219//cellular modified amino acid catabolic process;GO:0006563//L-serine metabolic process;GO:0070179//D-serine biosynthetic process	K22589//threo-3-hydroxy-L-aspartate ammonia-lyase [EC:4.3.1.16];K01754//threonine dehydratase [EC:4.3.1.19];K12235//serine racemase [EC:5.1.1.18]	NP_012704.1//threo-3-hydroxy-L-aspartate ammonia-lyase SRY1 [Saccharomyces cerevisiae S288C]
BK006949.2_mrna_6051	894	3946.71	16350.5	2.05062	3.47e-19	Up	8.36e-21	GO:0005840//ribosome;GO:0005634//nucleus;GO:0022625//cytosolic large ribosomal subunit	GO:0003735//structural constituent of ribosome;GO:0008097//5S rRNA binding	GO:0006412//translation;GO:0000027//ribosomal large subunit assembly;GO:0002181//cytoplasmic translation	K02932//large subunit ribosomal protein L5e	NP_015194.1//ribosomal 60S subunit protein L5 [Saccharomyces cerevisiae S288C]
BK006943.2_mrna_3366	474	65.228	29.7092	-1.13458	0.0179077	Down	0.00288922	GO:0022626//cytosolic ribosome	GO:0043022//ribosome binding;GO:0003743//translation initiation factor activity;GO:0003723//RNA binding;GO:0003746//translation elongation factor activity	GO:0006452//translational frameshifting;GO:0045905//positive regulation of translational termination;GO:0045901//positive regulation of translational elongation	K03263//translation initiation factor 5A	NP_012581.3//translation elongation factor eIF-5A [Saccharomyces cerevisiae S288C]
BK006938.2_mrna_994	156	249.851	65.0569	-1.94129	5.31e-09	Down	2.33e-10	GO:0005938//cell cortex;GO:0016021//integral component of membrane;GO:0071944//cell periphery	NA	NA	NA	NP_010319.3//hypothetical protein YDR034W-B [Saccharomyces cerevisiae S288C]
BK006943.2_mrna_3178	225	524.926	1588.03	1.59705	2.16e-12	Up	7.55e-14	GO:0016021//integral component of membrane;GO:0005739//mitochondrion;GO:0005741//mitochondrial outer membrane	NA	NA	NA	NP_878102.1//hypothetical protein YJL133C-A [Saccharomyces cerevisiae S288C]
BK006938.2_mrna_1444	411	3100.37	13546.9	2.12745	2.32e-30	Up	1.63e-32	GO:0005840//ribosome;GO:0022625//cytosolic large ribosomal subunit;GO:0030687//preribosome, large subunit precursor	GO:0003735//structural constituent of ribosome	GO:0006412//translation;GO:0002181//cytoplasmic translation	K02901//large subunit ribosomal protein L27e	NP_010759.1//ribosomal 60S subunit protein L27B [Saccharomyces cerevisiae S288C]
BK006940.2_mrna_1898	2487	11131.8	5503.65	-1.01622	2.13e-13	Down	6.94e-15	GO:0000329//fungal-type vacuole membrane;GO:0005783//endoplasmic reticulum;GO:0033254//vacuolar transporter chaperone complex;GO:0016021//integral component of membrane	GO:0000822//inositol hexakisphosphate binding;GO:0005516//calmodulin binding	GO:0006799//polyphosphate biosynthetic process;GO:0006797//polyphosphate metabolic process;GO:0016237//lysosomal microautophagy;GO:0048016//inositol phosphate-mediated signaling;GO:0008104//protein localization;GO:0042144//vacuole fusion, non-autophagic;GO:0007034//vacuolar transport	K02212//DNA replication licensing factor MCM4 [EC:3.6.4.12]	NP_116651.1//vacuolar transporter chaperone [Saccharomyces cerevisiae S288C]
BK006940.2_mrna_1948	180	182.341	570.321	1.64513	1.09e-11	Up	3.95e-13	GO:0005840//ribosome;GO:0022625//cytosolic large ribosomal subunit;GO:0005737//cytoplasm	GO:0003735//structural constituent of ribosome	GO:0006412//translation;GO:0002181//cytoplasmic translation	K02905//large subunit ribosomal protein L29e	NP_116690.3//ribosomal 60S subunit protein L29 [Saccharomyces cerevisiae S288C]
BK006945.2_mrna_3966	666	6727.39	28891.1	2.10251	2.53e-26	Up	2.62e-28	GO:0005840//ribosome;GO:0022625//cytosolic large ribosomal subunit	GO:0003735//structural constituent of ribosome	GO:0006415//translational termination;GO:0006412//translation;GO:0000027//ribosomal large subunit assembly;GO:0002181//cytoplasmic translation	K02866//large subunit ribosomal protein L10e	NP_013176.1//ribosomal 60S subunit protein L10 [Saccharomyces cerevisiae S288C]
BK006941.2_mrna_2382	3111	52743.4	9771.52	-2.43234	1.19e-55	Down	2.98e-58	GO:0005774//vacuolar membrane;GO:0005887//integral component of plasma membrane;GO:0000324//fungal-type vacuole;GO:0016021//integral component of membrane	GO:0015301//anion:anion antiporter activity;GO:0015116//sulfate transmembrane transporter activity;GO:0051087//chaperone binding;GO:0008271//secondary active sulfate transmembrane transporter activity	NA	K03321//sulfate permease, SulP family	NP_011641.1//hypothetical protein YGR125W [Saccharomyces cerevisiae S288C]
BK006945.2_mrna_4279	876	16444.4	7844.15	-1.06791	2.15e-15	Down	6.3e-17	GO:0005739//mitochondrion;GO:0005737//cytoplasm	GO:0050152//omega-amidase activity;GO:0016810//hydrolase activity, acting on carbon-nitrogen (but not peptide) bonds	GO:0006541//glutamine metabolic process;GO:0006807//nitrogen compound metabolic process;GO:0006107//oxaloacetate metabolic process;GO:0006528//asparagine metabolic process	K13566//omega-amidase [EC:3.5.1.3]	NP_013455.1//putative hydrolase [Saccharomyces cerevisiae S288C]
BK006945.2_mrna_4251	261	1236.7	340.956	-1.85883	6.3e-08	Down	3.04e-09	GO:0005634//nucleus;GO:0005739//mitochondrion;GO:0005737//cytoplasm	GO:0043023//ribosomal large subunit binding;GO:0043024//ribosomal small subunit binding	NA	NA	NP_013431.1//Tma10p [Saccharomyces cerevisiae S288C]
BK006947.3_mrna_5040	906	768.545	343.383	-1.16231	2.39e-05	Down	1.69e-06	GO:0005783//endoplasmic reticulum;GO:0045121//membrane raft;GO:0005938//cell cortex;GO:0016021//integral component of membrane;GO:0071944//cell periphery;GO:0005886//plasma membrane;GO:0005737//cytoplasm	NA	GO:0030437//ascospore formation;GO:0031505//fungal-type cell wall organization;GO:0006897//endocytosis;GO:0030866//cortical actin cytoskeleton organization;GO:0032185//septin cytoskeleton organization	NA	NP_014205.1//hypothetical protein YNL194C [Saccharomyces cerevisiae S288C]
BK006935.2_mrna_33	804	2080.06	772.37	-1.42926	4.57e-08	Down	2.18e-09	NA	NA	NA	NA	NP_009363.1//hypothetical protein YAL037W [Saccharomyces cerevisiae S288C]
BK006947.3_mrna_5165	576	2159.29	4492.01	1.0568	0.000821691	Up	7.91e-05	GO:0005840//ribosome;GO:0022625//cytosolic large ribosomal subunit	GO:0003735//structural constituent of ribosome;GO:0019843//rRNA binding	GO:0006412//translation;GO:0002181//cytoplasmic translation	K02940//large subunit ribosomal protein L9e	NP_014332.1//ribosomal 60S subunit protein L9B [Saccharomyces cerevisiae S288C]
BK006939.2_mrna_1706	387	45.0863	13.1372	-1.77903	8.33e-05	Down	6.44e-06	GO:0005634//nucleus;GO:0005737//cytoplasm	NA	NA	NA	NP_001257673.1//hypothetical protein YER084W [Saccharomyces cerevisiae S288C]
BK006944.2_mrna_3749	810	54200.9	738.468	-6.19764	1.07e-131	Down	1.43e-134	GO:0005634//nucleus	GO:0000978//RNA polymerase II proximal promoter sequence-specific DNA binding;GO:0000981//DNA-binding transcription factor activity, RNA polymerase II-specific;GO:0008270//zinc ion binding;GO:0043565//sequence-specific DNA binding;GO:0003700//DNA-binding transcription factor activity	GO:0042128//nitrate assimilation;GO:0000122//negative regulation of transcription by RNA polymerase II;GO:0090295//nitrogen catabolite repression of transcription	K09184//GATA-binding protein, other eukaryote	NP_012959.1//Dal80p [Saccharomyces cerevisiae S288C]
BK006943.2_mrna_3125	393	2954.36	16933.2	2.51894	7.97e-34	Up	4.4e-36	GO:0005840//ribosome;GO:0022627//cytosolic small ribosomal subunit	GO:0003735//structural constituent of ribosome	GO:0006412//translation;GO:0002181//cytoplasmic translation	K02957//small subunit ribosomal protein S15Ae	NP_012345.1//ribosomal 40S subunit protein S22A [Saccharomyces cerevisiae S288C]
BK006943.2_mrna_3478	1632	135385	1077.14	-6.97372	0	Down	0	GO:0031224//intrinsic component of membrane;GO:0000324//fungal-type vacuole;GO:0016021//integral component of membrane;GO:0071944//cell periphery;GO:0005886//plasma membrane	GO:0022857//transmembrane transporter activity;GO:0071916//dipeptide transmembrane transporter activity;GO:0015124//allantoate transmembrane transporter activity	GO:0055085//transmembrane transport;GO:0042939//tripeptide transport;GO:0015719//allantoate transport;GO:0042938//dipeptide transport	K08192//MFS transporter, ACS family, allantoate permease	NP_012686.3//allantoate permease [Saccharomyces cerevisiae S288C]
BK006941.2_mrna_2105	654	2669.99	10764.2	2.01134	9.47e-17	Up	2.6e-18	GO:0015934//large ribosomal subunit	GO:0003723//RNA binding;GO:0003735//structural constituent of ribosome	GO:0006412//translation	K02865//large subunit ribosomal protein L10Ae	SCV01180.1//LAMI_0G09846g1_1 [Lachancea mirantina]
BK006941.2_mrna_2213	318	1293.17	3833.41	1.56771	4.33e-15	Up	1.3e-16	GO:0005840//ribosome;GO:0022625//cytosolic large ribosomal subunit;GO:0005737//cytoplasm	GO:0003723//RNA binding;GO:0030627//pre-mRNA 5'-splice site binding;GO:0003735//structural constituent of ribosome	GO:0006412//translation;GO:0002181//cytoplasmic translation;GO:0048025//negative regulation of mRNA splicing, via spliceosome;GO:0006364//rRNA processing	K02908//large subunit ribosomal protein L30e	KOH50704.1//RPL30p Ribosomal 60S subunit protein L30 [Saccharomyces sp. 'boulardii']
BK006938.2_mrna_1421	411	1205.24	4981.57	2.04728	4.99e-18	Up	1.3e-19	GO:0005840//ribosome;GO:0022627//cytosolic small ribosomal subunit	GO:0003735//structural constituent of ribosome	GO:0000028//ribosomal small subunit assembly;GO:0006412//translation;GO:0002181//cytoplasmic translation	K02962//small subunit ribosomal protein S17e	NP_010735.3//ribosomal 40S subunit protein S17B [Saccharomyces cerevisiae S288C]
BK006938.2_mrna_793	672	3879.34	1173.93	-1.72446	2.92e-30	Down	2.1e-32	NA	NA	NA	NA	NP_010112.1//Ugx2p [Saccharomyces cerevisiae S288C]
BK006945.2_mrna_3940	759	3269.9	15908	2.28243	2.02e-24	Up	2.67e-26	GO:0022627//cytosolic small ribosomal subunit	GO:0003735//structural constituent of ribosome	GO:0000028//ribosomal small subunit assembly;GO:0006407//rRNA export from nucleus;GO:0006412//translation;GO:0000461//endonucleolytic cleavage to generate mature 3'-end of SSU-rRNA from (SSU-rRNA, 5.8S rRNA, LSU-rRNA);GO:0002181//cytoplasmic translation;GO:0000447//endonucleolytic cleavage in ITS1 to separate SSU-rRNA from 5.8S rRNA and LSU-rRNA from tricistronic rRNA transcript (SSU-rRNA, 5.8S r…	K02998//small subunit ribosomal protein SAe	NP_013149.1//ribosomal 40S subunit protein S0B [Saccharomyces cerevisiae S288C]
BK006943.2_mrna_3296	1200	8493.1	4045.59	-1.06994	1.86e-12	Down	6.42e-14	GO:0005634//nucleus;GO:0005971//ribonucleoside-diphosphate reductase complex;GO:0005737//cytoplasm	GO:0004748//ribonucleoside-diphosphate reductase activity, thioredoxin disulfide as acceptor;GO:0051063//CDP reductase activity;GO:0008270//zinc ion binding;GO:0046982//protein heterodimerization activity;GO:0016491//oxidoreductase activity;GO:0008198//ferrous iron binding	GO:0009263//deoxyribonucleotide biosynthetic process;GO:0006240//dCDP biosynthetic process;GO:0006260//DNA replication;GO:0046704//CDP metabolic process	K10808//ribonucleoside-diphosphate reductase subunit M2 [EC:1.17.4.1]	NP_012508.1//ribonucleotide-diphosphate reductase subunit RNR2 [Saccharomyces cerevisiae S288C]
BK006943.2_mrna_3416	279	515.021	1722.71	1.74198	2.29e-11	Up	8.37e-13	GO:0005840//ribosome;GO:0022625//cytosolic large ribosomal subunit	GO:0046872//metal ion binding;GO:0003735//structural constituent of ribosome	GO:0006412//translation;GO:0002181//cytoplasmic translation	K02921//large subunit ribosomal protein L37Ae	NP_015368.1//ribosomal 60S subunit protein L43A [Saccharomyces cerevisiae S288C]
BK006943.2_mrna_3367	330	2446.78	6667.13	1.44618	4.86e-11	Up	1.82e-12	GO:0005758//mitochondrial intermembrane space;GO:0070469//respiratory chain;GO:0005739//mitochondrion	GO:0009055//electron transfer activity;GO:0046872//metal ion binding;GO:0020037//heme binding	GO:0006123//mitochondrial electron transport, cytochrome c to oxygen;GO:0006122//mitochondrial electron transport, ubiquinol to cytochrome c	K08738//cytochrome c	NP_012582.1//cytochrome c isoform 1 [Saccharomyces cerevisiae S288C]
BK006936.2_mrna_292	663	6937.99	2216.75	-1.64608	4.05e-10	Down	1.65e-11	GO:0005634//nucleus;GO:0031519//PcG protein complex;GO:0005667//transcription factor complex;GO:0000790//nuclear chromatin	GO:0000978//RNA polymerase II proximal promoter sequence-specific DNA binding;GO:0046872//metal ion binding;GO:0003677//DNA binding;GO:0043565//sequence-specific DNA binding;GO:0000980//RNA polymerase II distal enhancer sequence-specific DNA binding;GO:0003676//nucleic acid binding	GO:1900464//negative regulation of cellular hyperosmotic salinity response by negative regulation of transcription from RNA polymerase II promoter;GO:2000221//negative regulation of pseudohyphal growth;GO:0043709//cell adhesion involved in single-species biofilm formation;GO:0000433//carbon catabolite repression of transcription from RNA polymerase II promoter by glucose;GO:1900460//negative regu…	K09467//zinc-finger protein CreA/MIG	NP_009622.1//Nrg2p [Saccharomyces cerevisiae S288C]
BK006938.2_mrna_877	600	2290.1	9178.29	2.00282	3.46e-21	Up	6.9e-23	GO:0005840//ribosome;GO:0022625//cytosolic large ribosomal subunit	GO:0003735//structural constituent of ribosome	GO:0006412//translation;GO:0002181//cytoplasmic translation	K02873//large subunit ribosomal protein L13e	NP_010201.1//ribosomal 60S subunit protein L13A [Saccharomyces cerevisiae S288C]
BK006938.2_mrna_1007	1815	651.813	1507.92	1.21003	0.00121349	Up	0.000122619	GO:0005783//endoplasmic reticulum;GO:0016021//integral component of membrane;GO:0005739//mitochondrion;GO:0005886//plasma membrane	GO:0022857//transmembrane transporter activity;GO:0015171//amino acid transmembrane transporter activity	GO:0055085//transmembrane transport;GO:0006865//amino acid transport	K16261//yeast amino acid transporter	NP_010331.3//amino acid transporter BAP3 [Saccharomyces cerevisiae S288C]
BK006938.2_mrna_909	1473	881.262	408.359	-1.10973	1.03e-06	Down	6.03e-08	GO:0005634//nucleus;GO:0005739//mitochondrion;GO:0005737//cytoplasm	GO:0046872//metal ion binding;GO:0043565//sequence-specific DNA binding;GO:0003676//nucleic acid binding	NA	K19849//signaling mucin MSB2	NP_010235.1//Stp4p [Saccharomyces cerevisiae S288C]
BK006948.2_mrna_5597	573	1787.1	10731	2.5861	1.44e-27	Up	1.3e-29	GO:0005840//ribosome;GO:0005654//nucleoplasm;GO:0030686//90S preribosome;GO:0032040//small-subunit processome;GO:0005730//nucleolus;GO:0022627//cytosolic small ribosomal subunit	GO:0003735//structural constituent of ribosome	GO:0031167//rRNA methylation;GO:0042254//ribosome biogenesis;GO:0006412//translation;GO:0002181//cytoplasmic translation;GO:0042274//ribosomal small subunit biogenesis;GO:0006364//rRNA processing	K02993//small subunit ribosomal protein S7e	NP_014739.1//ribosomal 40S subunit protein S7A [Saccharomyces cerevisiae S288C]
BK006946.2_mrna_4550	1626	1680.22	392.494	-2.09791	6.46e-44	Down	2.27e-46	GO:0005887//integral component of plasma membrane;GO:0000324//fungal-type vacuole;GO:0016021//integral component of membrane;GO:0071944//cell periphery;GO:0005739//mitochondrion;GO:0005886//plasma membrane	GO:0015149//hexose transmembrane transporter activity;GO:0005353//fructose transmembrane transporter activity;GO:0015578//mannose transmembrane transporter activity;GO:0005355//glucose transmembrane transporter activity;GO:0005351//carbohydrate:proton symporter activity;GO:0005354//galactose transmembrane transporter activity;GO:0022857//transmembrane transporter activity	GO:0055085//transmembrane transport;GO:0008645//hexose transmembrane transport;GO:0098704//carbohydrate import across plasma membrane	K08139//MFS transporter, SP family, sugar:H+ symporter	AJV24203.1//Hxt10p [Saccharomyces cerevisiae YJM1418]
BK006938.2_mrna_791	6438	22128.9	5228.55	-2.08145	1.18e-10	Down	4.54e-12	GO:0005739//mitochondrion	GO:0016040//glutamate synthase (NADH) activity;GO:0005506//iron ion binding;GO:0010181//FMN binding;GO:0050660//flavin adenine dinucleotide binding;GO:0016491//oxidoreductase activity;GO:0051538//3 iron, 4 sulfur cluster binding	GO:0097054//L-glutamate biosynthetic process;GO:0006537//glutamate biosynthetic process;GO:0019676//ammonia assimilation cycle	K00264//glutamate synthase (NADH) [EC:1.4.1.14]	NP_010110.1//glutamate synthase (NADH) [Saccharomyces cerevisiae S288C]
BK006938.2_mrna_1395	498	3103.46	12993.3	2.06582	2.41e-29	Up	1.97e-31	GO:0005840//ribosome;GO:0015934//large ribosomal subunit;GO:0022625//cytosolic large ribosomal subunit	GO:0003735//structural constituent of ribosome;GO:0070180//large ribosomal subunit rRNA binding;GO:0019843//rRNA binding	GO:0006412//translation;GO:0000027//ribosomal large subunit assembly;GO:0002181//cytoplasmic translation	K02870//large subunit ribosomal protein L12e	NP_010860.1//ribosomal 60S subunit protein L12A [Saccharomyces cerevisiae S288C]
BK006942.2_mrna_3084	1665	111737	6595.32	-4.08252	1.04e-190	Down	6.99e-194	GO:0005777//peroxisome	GO:0004474//malate synthase activity	GO:0006099//tricarboxylic acid cycle;GO:0006097//glyoxylate cycle;GO:0000256//allantoin catabolic process	K01638//malate synthase [EC:2.3.3.9]	EDN61526.1//malate synthase [Saccharomyces cerevisiae YJM789]
BK006940.2_mrna_1945	765	1999.83	11301.1	2.49852	4.09e-27	Up	3.97e-29	GO:0005840//ribosome;GO:0022625//cytosolic large ribosomal subunit	GO:0003735//structural constituent of ribosome;GO:0019843//rRNA binding	GO:0006412//translation;GO:0002181//cytoplasmic translation	K02938//large subunit ribosomal protein L8e	NP_012246.1//ribosomal 60S subunit protein L2B [Saccharomyces cerevisiae S288C]
BK006934.2_mrna_2587	3441	7995.14	3850.16	-1.05421	1.46e-05	Down	9.99e-07	GO:0097042//extrinsic component of fungal-type vacuolar membrane;GO:0035859//Seh1-associated complex;GO:1990130//GATOR1 complex	NA	GO:0007124//pseudohyphal growth;GO:0032007//negative regulation of TOR signaling;GO:0034198//cellular response to amino acid starvation;GO:2000785//regulation of autophagosome assembly;GO:1903833//positive regulation of cellular response to amino acid starvation;GO:0038202//TORC1 signaling;GO:0010508//positive regulation of autophagy;GO:0051321//meiotic cell cycle;GO:0051058//negative regulation …	K20406//nitrogen permease regulator 3-like protein	NP_011840.1//Npr3p [Saccharomyces cerevisiae S288C]
BK006946.2_mrna_4695	1683	5254.22	2461.72	-1.09381	0.00185819	Down	0.000199658	GO:0005634//nucleus	GO:0000981//DNA-binding transcription factor activity, RNA polymerase II-specific;GO:0008270//zinc ion binding;GO:0043565//sequence-specific DNA binding	GO:0006357//regulation of transcription by RNA polymerase II	K09184//GATA-binding protein, other eukaryote;K11204//glutamate--cysteine ligase catalytic subunit [EC:6.3.2.2]	NP_013856.1//Gat2p [Saccharomyces cerevisiae S288C]
BK006942.2_mrna_2986	495	11.2567	4.56618	-1.30173	0.0498446	Down	0.0109616	GO:0005737//cytoplasm	NA	GO:0006112//energy reserve metabolic process	NA	NP_012207.3//Rgi2p [Saccharomyces cerevisiae S288C]
BK006938.2_mrna_1053	933	7470.87	2894.33	-1.36805	1.88e-13	Down	6.09e-15	GO:0016021//integral component of membrane;GO:0005886//plasma membrane	GO:0015174//basic amino acid transmembrane transporter activity	NA	NA	NP_010375.1//hypothetical protein YDR090C [Saccharomyces cerevisiae S288C]
BK006939.2_mrna_1658	432	1471.35	523.921	-1.48972	9.6e-19	Down	2.38e-20	GO:0005829//cytosol;GO:0016021//integral component of membrane;GO:0005628//prospore membrane	NA	GO:0030476//ascospore wall assembly;GO:0032120//ascospore-type prospore membrane assembly;GO:0030437//ascospore formation	NA	NP_010965.1//Spo73p [Saccharomyces cerevisiae S288C]
BK006947.3_mrna_5250	1506	6086.63	1297.84	-2.22954	1.35e-29	Down	1.04e-31	GO:0005634//nucleus;GO:0005737//cytoplasm	GO:0004849//uridine kinase activity;GO:0005524//ATP binding;GO:0016301//kinase activity	GO:0009116//nucleoside metabolic process;GO:0008655//pyrimidine-containing compound salvage;GO:0044206//UMP salvage;GO:0044211//CTP salvage	K00876//uridine kinase [EC:2.7.1.48]	NP_014409.1//uridine kinase URK1 [Saccharomyces cerevisiae S288C]
BK006940.2_mrna_1973	1023	8495.17	1405.16	-2.5959	2.5e-37	Down	1.21e-39	NA	GO:0004121//cystathionine beta-lyase activity;GO:0030170//pyridoxal phosphate binding;GO:0047804//cysteine-S-conjugate beta-lyase activity	GO:0006790//sulfur compound metabolic process;GO:1990414//replication-born double-strand break repair via sister chromatid exchange;GO:0019450//L-cysteine catabolic process to pyruvate;GO:0006520//cellular amino acid metabolic process;GO:0009086//methionine biosynthetic process	K01760//cysteine-S-conjugate beta-lyase [EC:4.4.1.13];K01758//cystathionine gamma-lyase [EC:4.4.1.1]	NP_116714.1//cysteine-S-conjugate beta-lyase IRC7 [Saccharomyces cerevisiae S288C]
BK006946.2_mrna_4758	303	1081.43	3256.84	1.59054	2.97e-16	Up	8.5e-18	GO:0005840//ribosome;GO:0022625//cytosolic large ribosomal subunit	GO:0003723//RNA binding;GO:0003735//structural constituent of ribosome	GO:0006412//translation;GO:0002181//cytoplasmic translation	K02920//large subunit ribosomal protein L36e	NP_013920.1//ribosomal 60S subunit protein L36A [Saccharomyces cerevisiae S288C]
BK006945.2_mrna_4188	204	266.429	919.311	1.7868	2.21e-13	Up	7.26e-15	GO:0005840//ribosome;GO:0022627//cytosolic small ribosomal subunit	GO:0003735//structural constituent of ribosome	GO:0000028//ribosomal small subunit assembly;GO:0006407//rRNA export from nucleus;GO:0006412//translation;GO:0002181//cytoplasmic translation;GO:1900153//positive regulation of nuclear-transcribed mRNA catabolic process, deadenylation-dependent decay;GO:0030490//maturation of SSU-rRNA	K02979//small subunit ribosomal protein S28e	NP_013366.1//ribosomal 40S subunit protein S28B [Saccharomyces cerevisiae S288C]
BK006942.2_mrna_2944	1944	794.023	364.408	-1.12363	0.0185714	Down	0.00302737	GO:0005634//nucleus;GO:0005737//cytoplasm	GO:0003677//DNA binding;GO:0000981//DNA-binding transcription factor activity, RNA polymerase II-specific;GO:0043565//sequence-specific DNA binding;GO:0003700//DNA-binding transcription factor activity	GO:0031065//positive regulation of histone deacetylation;GO:0000122//negative regulation of transcription by RNA polymerase II;GO:0034599//cellular response to oxidative stress	NA	NP_012165.1//Xbp1p [Saccharomyces cerevisiae S288C]
BK006948.2_mrna_5682	192	592.488	2659.31	2.16619	1.47e-21	Up	2.83e-23	GO:0005840//ribosome;GO:0010494//cytoplasmic stress granule;GO:0022627//cytosolic small ribosomal subunit	GO:0003735//structural constituent of ribosome	GO:0006412//translation;GO:0002181//cytoplasmic translation	K02983//small subunit ribosomal protein S30e	NP_013390.1//ribosomal 40S subunit protein S30A [Saccharomyces cerevisiae S288C]
BK006943.2_mrna_3140	1731	123612	26948.3	-2.19755	3.14e-40	Down	1.26e-42	GO:0005774//vacuolar membrane;GO:0000324//fungal-type vacuole;GO:0016021//integral component of membrane;GO:0000328//fungal-type vacuole lumen;GO:0005775//vacuolar lumen	GO:0004180//carboxypeptidase activity;GO:0046872//metal ion binding;GO:0004181//metallocarboxypeptidase activity	GO:0006807//nitrogen compound metabolic process;GO:0051603//proteolysis involved in cellular protein catabolic process	K01293//Gly-Xaa carboxypeptidase [EC:3.4.17.4]	NP_012363.1//Gly-Xaa carboxypeptidase [Saccharomyces cerevisiae S288C]
BK006939.2_mrna_1753	360	1134.36	6198.93	2.45014	2.57e-27	Up	2.4e-29	GO:0005840//ribosome;GO:0022627//cytosolic small ribosomal subunit	GO:0003729//mRNA binding;GO:0003735//structural constituent of ribosome	GO:0006407//rRNA export from nucleus;GO:0006412//translation;GO:0002181//cytoplasmic translation;GO:0042255//ribosome assembly	K02976//small subunit ribosomal protein S26e	KOH51059.1//RPS26Bp Protein component of the small (40S) ribosomal subunit [Saccharomyces sp. 'boulardii']
BK006938.2_mrna_755	1716	13254.3	437.774	-4.92013	2.25e-146	Down	2.64e-149	GO:0000329//fungal-type vacuole membrane;GO:0016021//integral component of membrane	GO:0015489//putrescine transmembrane transporter activity;GO:0015495//gamma-aminobutyric acid:proton symporter activity;GO:0022857//transmembrane transporter activity	GO:0006865//amino acid transport;GO:0055085//transmembrane transport;GO:0015847//putrescine transport;GO:0015812//gamma-aminobutyric acid transport	K19564//choline transport protein;K09885//aquaporin rerated protein, other eukaryote	NP_010071.1//Uga4p [Saccharomyces cerevisiae S288C]
BK006946.2_mrna_4635	357	13.2254	5.34535	-1.30695	0.0467636	Down	0.0100904	NA	NA	NA	NA	NP_001335805.1//hypothetical protein YMR082C [Saccharomyces cerevisiae S288C]
BK006934.2_mrna_2690	1140	21161	10417.5	-1.0224	0.000136656	Down	1.11e-05	GO:0005737//cytoplasm	GO:0050661//NADP binding;GO:0008677//2-dehydropantoate 2-reductase activity	GO:0015940//pantothenate biosynthetic process;GO:0033317//pantothenate biosynthetic process from valine	K00077//2-dehydropantoate 2-reductase [EC:1.1.1.169]	NP_011930.1//2-dehydropantoate 2-reductase PAN5 [Saccharomyces cerevisiae S288C]
BK006945.2_mrna_4167	1080	5789.75	2865.47	-1.01473	5.84e-12	Down	2.09e-13	GO:0005783//endoplasmic reticulum;GO:0097038//perinuclear endoplasmic reticulum;GO:0031211//endoplasmic reticulum palmitoyltransferase complex;GO:0030176//integral component of endoplasmic reticulum membrane;GO:0005794//Golgi apparatus;GO:0032541//cortical endoplasmic reticulum;GO:0016021//integral component of membrane	GO:0016409//palmitoyltransferase activity;GO:0019706//protein-cysteine S-palmitoyltransferase activity	GO:0018345//protein palmitoylation;GO:0006612//protein targeting to membrane;GO:0018230//peptidyl-L-cysteine S-palmitoylation	K16675//palmitoyltransferase ZDHHC9/14/18 [EC:2.3.1.225]	NP_013347.1//palmitoyltransferase ERF2 [Saccharomyces cerevisiae S288C]
BK006947.3_mrna_5305	873	622.89	227.974	-1.45011	8.8e-09	Down	3.93e-10	NA	GO:0052689//carboxylic ester hydrolase activity;GO:0004301//epoxide hydrolase activity	GO:0009636//response to toxic substance	K03124//transcription initiation factor TFIIB;K08726//soluble epoxide hydrolase / lipid-phosphate phosphatase [EC:3.3.2.10 3.1.3.76]	NP_014462.1//epoxide hydrolase [Saccharomyces cerevisiae S288C]
BK006944.2_mrna_3605	306	10.7126	43.4773	2.02095	4.38e-05	Up	3.25e-06	NA	NA	NA	NA	NP_001335789.1//hypothetical protein YKL102C [Saccharomyces cerevisiae S288C]
BK006942.2_mrna_2895	1590	6422.74	1054.3	-2.6069	9.44e-45	Down	3.16e-47	GO:0005774//vacuolar membrane;GO:0031307//integral component of mitochondrial outer membrane;GO:0016021//integral component of membrane;GO:0005741//mitochondrial outer membrane;GO:0034045//phagophore assembly site membrane	NA	GO:0006914//autophagy;GO:0031930//mitochondria-nucleus signaling pathway;GO:0000422//autophagy of mitochondrion	K17984//autophagy-related protein 32	NP_012120.1//mitophagy protein ATG32 [Saccharomyces cerevisiae S288C]
BK006936.2_mrna_354	1554	21174.7	9960.03	-1.08812	1e-09	Down	4.2e-11	GO:0010494//cytoplasmic stress granule;GO:0000329//fungal-type vacuole membrane;GO:0016021//integral component of membrane;GO:0033180//proton-transporting V-type ATPase, V1 domain;GO:1990816//vacuole-mitochondrion membrane contact site;GO:0000221//vacuolar proton-transporting V-type ATPase, V1 domain;GO:0005737//cytoplasm	GO:0005524//ATP binding;GO:0046961//proton-transporting ATPase activity, rotational mechanism	GO:0046034//ATP metabolic process;GO:0055085//transmembrane transport;GO:1902906//proteasome storage granule assembly;GO:0015991//ATP hydrolysis coupled proton transport;GO:0007035//vacuolar acidification;GO:0006874//cellular calcium ion homeostasis	K02147//V-type H+-transporting ATPase subunit B	NP_009685.3//H(+)-transporting V1 sector ATPase subunit B [Saccharomyces cerevisiae S288C]
BK006946.2_mrna_4811	519	2281.81	11938.2	2.38734	9e-31	Up	6.18e-33	GO:0005840//ribosome;GO:0022625//cytosolic large ribosomal subunit	GO:0003735//structural constituent of ribosome	GO:0006412//translation;GO:0002181//cytoplasmic translation	K02882//large subunit ribosomal protein L18Ae	NP_013969.3//ribosomal 60S subunit protein L20A [Saccharomyces cerevisiae S288C]
BK006949.2_mrna_5914	957	1339.96	569.034	-1.2356	1.41e-07	Down	7.13e-09	GO:0005759//mitochondrial matrix;GO:0030686//90S preribosome;GO:0005730//nucleolus;GO:0030688//preribosome, small subunit precursor	GO:0003723//RNA binding;GO:0052909//18S rRNA (adenine(1779)-N(6)/adenine(1780)-N(6))-dimethyltransferase activity;GO:0000179//rRNA (adenine-N6,N6-)-dimethyltransferase activity	GO:0000154//rRNA modification;GO:0031167//rRNA methylation;GO:0000462//maturation of SSU-rRNA from tricistronic rRNA transcript (SSU-rRNA, 5.8S rRNA, LSU-rRNA)	K14191//18S rRNA (adenine1779-N6/adenine1780-N6)-dimethyltransferase [EC:2.1.1.183]	NP_015057.1//putative dimethyladenosine transferase [Saccharomyces cerevisiae S288C]
BK006934.2_mrna_2775	321	2393.7	11632.4	2.28084	5.05e-25	Up	6.25e-27	GO:0005840//ribosome;GO:0022625//cytosolic large ribosomal subunit	GO:0003735//structural constituent of ribosome	GO:0046898//response to cycloheximide;GO:0006412//translation;GO:0002181//cytoplasmic translation	K02929//large subunit ribosomal protein L44e	NP_012010.1//ribosomal 60S subunit protein L42B [Saccharomyces cerevisiae S288C]
BK006937.2_mrna_557	240	142.123	31.7231	-2.16353	3.28e-07	Down	1.77e-08	GO:0000324//fungal-type vacuole;GO:0016021//integral component of membrane;GO:0071944//cell periphery;GO:0005886//plasma membrane;GO:0031225//anchored component of membrane	NA	NA	NA	NP_001032573.1//hypothetical protein YCL048W-A [Saccharomyces cerevisiae S288C]
BK006938.2_mrna_884	342	2554.19	11088.2	2.11809	4.75e-21	Up	9.71e-23	GO:0005840//ribosome;GO:0022625//cytosolic large ribosomal subunit	GO:0003735//structural constituent of ribosome	GO:0006412//translation;GO:0002181//cytoplasmic translation;GO:0006450//regulation of translational fidelity	K02910//large subunit ribosomal protein L31e	NP_010208.1//ribosomal 60S subunit protein L31A [Saccharomyces cerevisiae S288C]
BK006949.2_mrna_6227	279	1966.1	8225.51	2.06477	6.41e-20	Up	1.45e-21	GO:0005840//ribosome;GO:0022625//cytosolic large ribosomal subunit	GO:0046872//metal ion binding;GO:0003735//structural constituent of ribosome	GO:0006412//translation;GO:0002181//cytoplasmic translation	K02921//large subunit ribosomal protein L37Ae	NP_015368.1//ribosomal 60S subunit protein L43A [Saccharomyces cerevisiae S288C]
BK006949.2_mrna_6102	594	172.675	953.025	2.46446	2.28e-15	Up	6.73e-17	GO:0005654//nucleoplasm;GO:0030686//90S preribosome;GO:0032040//small-subunit processome;GO:0005730//nucleolus;GO:0022627//cytosolic small ribosomal subunit;GO:0015935//small ribosomal subunit;GO:0005737//cytoplasm	GO:0003735//structural constituent of ribosome;GO:0019843//rRNA binding	GO:0031167//rRNA methylation;GO:0000462//maturation of SSU-rRNA from tricistronic rRNA transcript (SSU-rRNA, 5.8S rRNA, LSU-rRNA);GO:0006412//translation;GO:0002181//cytoplasmic translation;GO:0045903//positive regulation of translational fidelity	K02997//small subunit ribosomal protein S9e	NP_015244.1//ribosomal 40S subunit protein S9A [Saccharomyces cerevisiae S288C]
BK006936.2_mrna_206	843	2179.24	1081.89	-1.01027	4.52e-08	Down	2.15e-09	GO:0005634//nucleus	GO:0003677//DNA binding	NA	NA	NP_009543.1//hypothetical protein YBL010C [Saccharomyces cerevisiae S288C]
BK006938.2_mrna_727	2373	6309.26	2162.77	-1.54459	3.09e-10	Down	1.25e-11	GO:0005816//spindle pole body;GO:0070056//prospore membrane leading edge;GO:0005737//cytoplasm;GO:0005628//prospore membrane	NA	GO:0030476//ascospore wall assembly;GO:0030435//sporulation resulting in formation of a cellular spore;GO:0000001//mitochondrion inheritance;GO:0032120//ascospore-type prospore membrane assembly;GO:0051301//cell division	K20361//intracellular protein transport protein USO1	NP_010042.2//Ady3p [Saccharomyces cerevisiae S288C]
BK006938.2_mrna_976	591	2396.56	832.48	-1.52548	3.3e-23	Down	5.36e-25	GO:0005874//microtubule;GO:0005829//cytosol;GO:1990316//Atg1/ULK1 kinase complex;GO:0000407//phagophore assembly site;GO:0005737//cytoplasm	NA	GO:0044805//late nucleophagy;GO:0000741//karyogamy;GO:0007059//chromosome segregation;GO:0006914//autophagy;GO:0015031//protein transport;GO:0034727//piecemeal microautophagy of the nucleus;GO:0000422//autophagy of mitochondrion	K21144//autophagy-related protein 31	NP_010305.1//Atg31p [Saccharomyces cerevisiae S288C]
BK006945.2_mrna_3945	327	15155.3	789.897	-4.26201	5.25e-107	Down	8.79e-110	NA	NA	NA	NA	GAX71732.1//hypothetical protein SCKG_4833 [Saccharomyces cerevisiae]
BK006941.2_mrna_2116	765	4663.45	18957.9	2.02333	4.03e-25	Up	4.86e-27	GO:0005654//nucleoplasm;GO:0032040//small-subunit processome;GO:0005730//nucleolus;GO:0022627//cytosolic small ribosomal subunit;GO:0015935//small ribosomal subunit	GO:0003723//RNA binding;GO:0070181//small ribosomal subunit rRNA binding;GO:0003735//structural constituent of ribosome	GO:0031167//rRNA methylation;GO:0006407//rRNA export from nucleus;GO:0006412//translation;GO:0045903//positive regulation of translational fidelity	K02981//small subunit ribosomal protein S2e	NP_011392.1//ribosomal 40S subunit protein S2 [Saccharomyces cerevisiae S288C]
BK006936.2_mrna_373	891	10522.6	5178.81	-1.0228	3.74e-05	Down	2.75e-06	GO:0071627//integral component of fungal-type vacuolar membrane;GO:0016021//integral component of membrane;GO:0005739//mitochondrion;GO:0031966//mitochondrial membrane	GO:0015174//basic amino acid transmembrane transporter activity	GO:0034488//basic amino acid transmembrane export from vacuole	K12386//cystinosin	NP_009705.1//cationic amino acid transporter [Saccharomyces cerevisiae S288C]
BK006939.2_mrna_1590	657	3233.79	1610.18	-1.006	1e-06	Down	5.81e-08	GO:0005737//cytoplasm	GO:0005524//ATP binding;GO:0016740//transferase activity;GO:0061631//ubiquitin conjugating enzyme activity;GO:0004842//ubiquitin-protein transferase activity	GO:0006511//ubiquitin-dependent protein catabolic process;GO:0043161//proteasome-mediated ubiquitin-dependent protein catabolic process;GO:0045721//negative regulation of gluconeogenesis	K10576//ubiquitin-conjugating enzyme E2 H [EC:2.3.2.23]	NP_010904.2//E2 ubiquitin-conjugating protein UBC8 [Saccharomyces cerevisiae S288C]
BK006947.3_mrna_5310	1470	7224.03	2661.56	-1.44053	3.17e-19	Down	7.59e-21	GO:0000151//ubiquitin ligase complex	GO:0034450//ubiquitin-ubiquitin ligase activity	GO:0006513//protein monoubiquitination;GO:0000209//protein polyubiquitination	NA	NP_014467.3//Bsc5p [Saccharomyces cerevisiae S288C]
BK006941.2_mrna_2044	1287	13116.6	5350.47	-1.29365	6.2e-13	Down	2.1e-14	NA	GO:0008721//D-serine ammonia-lyase activity	GO:0070178//D-serine metabolic process;GO:0036088//D-serine catabolic process	K20498//D-serine ammonia-lyase [EC:4.3.1.18]	NP_011319.2//D-serine ammonia-lyase DSD1 [Saccharomyces cerevisiae S288C]
BK006939.2_mrna_1726	603	2798.6	12668.8	2.1785	3.12e-23	Up	5.02e-25	GO:0005840//ribosome;GO:0030686//90S preribosome;GO:0022627//cytosolic small ribosomal subunit	GO:0003735//structural constituent of ribosome	GO:0000462//maturation of SSU-rRNA from tricistronic rRNA transcript (SSU-rRNA, 5.8S rRNA, LSU-rRNA);GO:0006412//translation;GO:0002181//cytoplasmic translation	K02995//small subunit ribosomal protein S8e	NP_009481.1//ribosomal 40S subunit protein S8A [Saccharomyces cerevisiae S288C]
BK006941.2_mrna_2337	1692	9552.64	2652.09	-1.84877	0.00100445	Down	9.78e-05	GO:0005829//cytosol;GO:0005737//cytoplasm	GO:0004737//pyruvate decarboxylase activity;GO:0050177//phenylpyruvate decarboxylase activity;GO:0000287//magnesium ion binding;GO:0047434//indolepyruvate decarboxylase activity;GO:0016831//carboxy-lyase activity;GO:0030976//thiamine pyrophosphate binding;GO:0047433//branched-chain-2-oxoacid decarboxylase activity	GO:0006067//ethanol metabolic process;GO:0009083//branched-chain amino acid catabolic process;GO:0006090//pyruvate metabolic process;GO:0000949//aromatic amino acid family catabolic process to alcohol via Ehrlich pathway;GO:0006569//tryptophan catabolic process;GO:0006559//L-phenylalanine catabolic process	K01568//pyruvate decarboxylase [EC:4.1.1.1]	EDV10160.1//pyruvate decarboxylase isozyme [Saccharomyces cerevisiae RM11-1a]
BK006942.2_mrna_2992	366	1838.98	7419.42	2.0124	3.97e-22	Up	7.45e-24	GO:0005840//ribosome;GO:0022625//cytosolic large ribosomal subunit;GO:0030687//preribosome, large subunit precursor	GO:0003735//structural constituent of ribosome	GO:0042254//ribosome biogenesis;GO:0006412//translation;GO:0002181//cytoplasmic translation	K02915//large subunit ribosomal protein L34e	NP_012212.1//ribosomal 60S subunit protein L34B [Saccharomyces cerevisiae S288C]
BK006948.2_mrna_5563	1164	6201.42	22387.5	1.85202	1.88e-20	Up	4.07e-22	GO:0005840//ribosome;GO:0022625//cytosolic large ribosomal subunit	GO:0003735//structural constituent of ribosome	GO:1990145//maintenance of translational fidelity;GO:0006412//translation;GO:0000027//ribosomal large subunit assembly;GO:0002181//cytoplasmic translation;GO:0006364//rRNA processing	K02925//large subunit ribosomal protein L3e	NP_014706.1//ribosomal 60S subunit protein L3 [Saccharomyces cerevisiae S288C]
BK006945.2_mrna_4042	822	2710.45	10443.1	1.94594	1.32e-23	Up	1.97e-25	GO:0005634//nucleus;GO:0005737//cytoplasm;GO:0005844//polysome;GO:0048471//perinuclear region of cytoplasm	GO:0043022//ribosome binding;GO:0042162//telomeric DNA binding;GO:0003677//DNA binding;GO:0045142//triplex DNA binding	GO:0031929//TOR signaling;GO:0043558//regulation of translational initiation in response to stress;GO:0006414//translational elongation;GO:0043066//negative regulation of apoptotic process;GO:0000723//telomere maintenance	K13199//plasminogen activator inhibitor 1 RNA-binding protein	NP_013251.1//Stm1p [Saccharomyces cerevisiae S288C]
BK006940.2_mrna_1934	1836	1414.77	459.513	-1.62239	3.64e-06	Down	2.29e-07	GO:0010494//cytoplasmic stress granule;GO:0005634//nucleus;GO:1990904//ribonucleoprotein complex;GO:0005829//cytosol;GO:0005737//cytoplasm	GO:0008143//poly(A) binding;GO:0003723//RNA binding;GO:0008266//poly(U) RNA binding;GO:0003730//mRNA 3'-UTR binding	NA	K13126//polyadenylate-binding protein	NP_116678.1//Pes4p [Saccharomyces cerevisiae S288C]
BK006942.2_mrna_3085	588	18522.8	2433.73	-2.92806	2.57e-27	Down	2.41e-29	GO:0016020//membrane	GO:0050385//ureidoglycolate lyase activity;GO:0004848//ureidoglycolate hydrolase activity	GO:0006144//purine nucleobase metabolic process;GO:0000256//allantoin catabolic process	K01483//ureidoglycolate lyase [EC:4.3.2.3]	NP_012298.1//ureidoglycolate hydrolase [Saccharomyces cerevisiae S288C]
BK006936.2_mrna_365	1527	17112.4	8316.95	-1.04091	1.64e-07	Down	8.4e-09	GO:0000324//fungal-type vacuole;GO:0000328//fungal-type vacuole lumen	GO:0004185//serine-type carboxypeptidase activity;GO:0017171//serine hydrolase activity	GO:0051603//proteolysis involved in cellular protein catabolic process;GO:0031638//zymogen activation;GO:0046938//phytochelatin biosynthetic process;GO:0016236//macroautophagy	K13289//cathepsin A (carboxypeptidase C) [EC:3.4.16.5]	NP_009697.3//carboxypeptidase C [Saccharomyces cerevisiae S288C]
BK006938.2_mrna_1379	666	3817.83	876.315	-2.12323	1.78e-20	Down	3.82e-22	GO:0005634//nucleus;GO:0005737//cytoplasm	GO:0000310//xanthine phosphoribosyltransferase activity;GO:0046872//metal ion binding;GO:0016757//transferase activity, transferring glycosyl groups;GO:0052657//guanine phosphoribosyltransferase activity;GO:0004615//phosphomannomutase activity;GO:0000166//nucleotide binding;GO:0004422//hypoxanthine phosphoribosyltransferase activity	GO:0009116//nucleoside metabolic process;GO:0032264//IMP salvage;GO:0046100//hypoxanthine metabolic process;GO:0032263//GMP salvage;GO:0032265//XMP salvage	K19836//hypoxanthine phosphoribosyltransferase [EC:2.4.2.8]	NP_010687.3//hypoxanthine phosphoribosyltransferase [Saccharomyces cerevisiae S288C]
BK006939.2_mrna_1672	366	1962.28	8298.78	2.08037	1.72e-20	Up	3.66e-22	GO:0005840//ribosome;GO:0022625//cytosolic large ribosomal subunit;GO:0030687//preribosome, large subunit precursor	GO:0003735//structural constituent of ribosome	GO:0042254//ribosome biogenesis;GO:0006412//translation;GO:0002181//cytoplasmic translation	K02915//large subunit ribosomal protein L34e	NP_010977.2//ribosomal 60S subunit protein L34A [Saccharomyces cerevisiae S288C]
BK006942.2_mrna_2873	2988	5950.82	2175.97	-1.45143	6.33e-06	Down	4.11e-07	GO:0016020//membrane;GO:0005618//cell wall;GO:0005576//extracellular region;GO:0071944//cell periphery;GO:0031225//anchored component of membrane	NA	GO:0007165//signal transduction;GO:0071555//cell wall organization	K22020//mucin-19;K19851//flocculation protein FLO11	NP_012097.1//Css1p [Saccharomyces cerevisiae S288C]
BK006939.2_mrna_1816	1005	288.578	133.595	-1.1111	0.00281931	Down	0.000318499	GO:0005634//nucleus;GO:0000794//condensed nuclear chromosome	GO:0003677//DNA binding;GO:0042030//ATPase inhibitor activity;GO:0005524//ATP binding;GO:0003690//double-stranded DNA binding;GO:0000150//recombinase activity;GO:0003697//single-stranded DNA binding;GO:0008094//DNA-dependent ATPase activity;GO:0016887//ATPase activity	GO:0030435//sporulation resulting in formation of a cellular spore;GO:0006281//DNA repair;GO:0042148//strand invasion;GO:0007130//synaptonemal complex assembly;GO:0000709//meiotic joint molecule formation;GO:0007131//reciprocal meiotic recombination;GO:0051321//meiotic cell cycle;GO:0006312//mitotic recombination;GO:0000730//DNA recombinase assembly	K10872//meiotic recombination protein DMC1	NP_011106.1//recombinase DMC1 [Saccharomyces cerevisiae S288C]
BK006943.2_mrna_3417	969	346.718	161.78	-1.09973	0.000803692	Down	7.71e-05	GO:0005743//mitochondrial inner membrane;GO:0016021//integral component of membrane;GO:0005739//mitochondrion	GO:0005469//succinate:fumarate antiporter activity;GO:0022857//transmembrane transporter activity	GO:0015741//fumarate transport;GO:0015744//succinate transport	K15100//solute carrier family 25 (mitochondrial citrate transporter), member 1	NP_012629.1//Sfc1p [Saccharomyces cerevisiae S288C]
BK006945.2_mrna_3953	366	2389.13	9557.79	2.00019	1.85e-23	Up	2.85e-25	GO:0005840//ribosome;GO:0022625//cytosolic large ribosomal subunit	GO:0003723//RNA binding;GO:0003735//structural constituent of ribosome	GO:0006412//translation;GO:0000282//cellular bud site selection;GO:0002181//cytoplasmic translation	K02891//large subunit ribosomal protein L22e	NP_013162.1//ribosomal 60S subunit protein L22A [Saccharomyces cerevisiae S288C]
BK006934.2_mrna_2595	2208	242820	3531.53	-6.10345	3.82e-189	Down	3.2e-192	NA	NA	NA	K20989//urea-proton symporter	AJU22326.1//Dur3p [Saccharomyces cerevisiae YJM1463]
BK006938.2_mrna_1251	315	83.1492	23.2717	-1.83712	2.82e-06	Down	1.73e-07	GO:0005774//vacuolar membrane;GO:0000324//fungal-type vacuole;GO:0016021//integral component of membrane	NA	NA	NA	NP_010567.1//Phm6p [Saccharomyces cerevisiae S288C]
BK006934.2_mrna_2628	411	3113.28	15604.3	2.32544	1.99e-32	Up	1.24e-34	GO:0005840//ribosome;GO:0022625//cytosolic large ribosomal subunit;GO:0030687//preribosome, large subunit precursor	GO:0003735//structural constituent of ribosome	GO:0006412//translation;GO:0002181//cytoplasmic translation	K02901//large subunit ribosomal protein L27e	NP_011874.1//ribosomal 60S subunit protein L27A [Saccharomyces cerevisiae S288C]
BK006947.3_mrna_5203	1839	99.1206	32.92	-1.59022	0.00104267	Down	0.000102435	NA	NA	NA	K01183//chitinase [EC:3.2.1.14]	NP_014364.1//hypothetical protein YNL034W [Saccharomyces cerevisiae S288C]
BK006938.2_mrna_876	432	1352.61	8308.98	2.61892	4.09e-32	Up	2.6e-34	GO:0005840//ribosome;GO:0030686//90S preribosome;GO:0022627//cytosolic small ribosomal subunit	GO:0003723//RNA binding;GO:0003735//structural constituent of ribosome	GO:0000462//maturation of SSU-rRNA from tricistronic rRNA transcript (SSU-rRNA, 5.8S rRNA, LSU-rRNA);GO:0006412//translation;GO:0002181//cytoplasmic translation;GO:0006310//DNA recombination	K02960//small subunit ribosomal protein S16e	NP_010200.1//ribosomal 40S subunit protein S16B [Saccharomyces cerevisiae S288C]
BK006939.2_mrna_1527	540	6558.65	1594.66	-2.04015	7.54e-51	Down	2.02e-53	GO:0005634//nucleus;GO:0005737//cytoplasm	GO:0016746//transferase activity, transferring acyl groups;GO:0004402//histone acetyltransferase activity;GO:0047812//D-amino-acid N-acetyltransferase activity;GO:0008080//N-acetyltransferase activity	GO:0046416//D-amino acid metabolic process;GO:0006473//protein acetylation;GO:0070458//cellular detoxification of nitrogen compound	K18852//D-amino-acid N-acetyltransferase [EC:2.3.1.36]	NP_010848.1//D-amino-acid N-acetyltransferase [Saccharomyces cerevisiae S288C]
BK006942.2_mrna_2958	1473	23371.9	11113.2	-1.0725	1.86e-12	Down	6.38e-14	GO:0000329//fungal-type vacuole membrane;GO:0000324//fungal-type vacuole;GO:0016021//integral component of membrane;GO:0005886//plasma membrane	GO:0005313//L-glutamate transmembrane transporter activity;GO:0005290//L-histidine transmembrane transporter activity;GO:0015189//L-lysine transmembrane transporter activity;GO:0061459//L-arginine transmembrane transporter activity;GO:0005302//L-tyrosine transmembrane transporter activity;GO:0015194//L-serine transmembrane transporter activity;GO:0015171//amino acid transmembrane transporter acti…	GO:0006865//amino acid transport;GO:0003333//amino acid transmembrane transport	K14997//solute carrier family 38 (sodium-coupled neutral amino acid transporter), member 11	NP_012178.1//Avt7p [Saccharomyces cerevisiae S288C]
BK006947.3_mrna_5162	597	2521.16	12906.4	2.35593	1.03e-27	Up	9.12e-30	GO:0005840//ribosome;GO:0015934//large ribosomal subunit;GO:0022625//cytosolic large ribosomal subunit	GO:0003723//RNA binding;GO:0003729//mRNA binding;GO:0003735//structural constituent of ribosome	GO:0017148//negative regulation of translation;GO:0006412//translation;GO:0002181//cytoplasmic translation	K02872//large subunit ribosomal protein L13Ae	NP_014330.1//ribosomal 60S subunit protein L16B [Saccharomyces cerevisiae S288C]
BK006938.2_mrna_1472	267	1440.12	5374.8	1.90002	7.45e-20	Up	1.7e-21	GO:0005840//ribosome;GO:0022625//cytosolic large ribosomal subunit;GO:0030687//preribosome, large subunit precursor	GO:0046872//metal ion binding;GO:0003735//structural constituent of ribosome;GO:0019843//rRNA binding	GO:0000448//cleavage in ITS2 between 5.8S rRNA and LSU-rRNA of tricistronic rRNA transcript (SSU-rRNA, 5.8S rRNA, LSU-rRNA);GO:0006412//translation;GO:0002181//cytoplasmic translation	K02922//large subunit ribosomal protein L37e	NP_010788.1//ribosomal 60S subunit protein L37B [Saccharomyces cerevisiae S288C]
BK006949.2_mrna_6041	324	4461.95	15471.3	1.79385	9.6e-19	Up	2.38e-20	GO:0005840//ribosome;GO:0022625//cytosolic large ribosomal subunit	GO:0003735//structural constituent of ribosome	GO:0006412//translation;GO:0002181//cytoplasmic translation;GO:0042273//ribosomal large subunit biogenesis	K02917//large subunit ribosomal protein L35Ae	NP_015182.1//ribosomal 60S subunit protein L33A [Saccharomyces cerevisiae S288C]
BK006942.2_mrna_2971	1410	33678	73002.1	1.11613	0.00127727	Up	0.000130613	GO:0005737//cytoplasm	GO:0061759//alpha-ketoglutarate reductase activity;GO:0051287//NAD binding;GO:0004617//phosphoglycerate dehydrogenase activity	GO:0006564//L-serine biosynthetic process;GO:0009070//serine family amino acid biosynthetic process	K00058//D-3-phosphoglycerate dehydrogenase / 2-oxoglutarate reductase [EC:1.1.1.95 1.1.1.399]	NP_012191.1//phosphoglycerate dehydrogenase SER33 [Saccharomyces cerevisiae S288C]
BK006938.2_mrna_750	2100	8154.43	1590.14	-2.35843	1.17e-12	Down	3.99e-14	GO:0005634//nucleus;GO:0005737//cytoplasm	GO:0004674//protein serine/threonine kinase activity;GO:0005524//ATP binding;GO:0004672//protein kinase activity	GO:0006468//protein phosphorylation;GO:0046020//negative regulation of transcription from RNA polymerase II promoter by pheromones;GO:0035556//intracellular signal transduction;GO:0031138//negative regulation of conjugation with cellular fusion	K15361//WD repeat-containing protein 48;K08286//protein-serine/threonine kinase [EC:2.7.11.-]	NP_010067.1//serine/threonine protein kinase PRR2 [Saccharomyces cerevisiae S288C]
BK006941.2_mrna_2406	468	3353.54	14818.9	2.14368	2.31e-22	Up	3.99e-24	GO:0005840//ribosome;GO:0022625//cytosolic large ribosomal subunit	GO:0003723//RNA binding;GO:0003735//structural constituent of ribosome	GO:1902626//assembly of large subunit precursor of preribosome;GO:0006412//translation;GO:0000027//ribosomal large subunit assembly;GO:0002181//cytoplasmic translation	K02896//large subunit ribosomal protein L24e	NP_011664.3//ribosomal 60S subunit protein L24B [Saccharomyces cerevisiae S288C]
BK006934.2_mrna_2776	951	3000.03	6095.6	1.02279	2.12e-14	Up	6.55e-16	GO:0005783//endoplasmic reticulum;GO:0016021//integral component of membrane;GO:0005934//cellular bud tip;GO:0005789//endoplasmic reticulum membrane;GO:0005935//cellular bud neck;GO:0005628//prospore membrane	GO:0051082//unfolded protein binding	GO:0006457//protein folding;GO:0006888//ER to Golgi vesicle-mediated transport;GO:0071555//cell wall organization;GO:0015031//protein transport;GO:0034221//fungal-type cell wall chitin biosynthetic process	NA	NP_012011.1//Chs7p [Saccharomyces cerevisiae S288C]
BK006945.2_mrna_4369	1275	3414.75	650.636	-2.39186	4.92e-31	Down	3.29e-33	GO:0005634//nucleus;GO:0005829//cytosol;GO:0005737//cytoplasm	GO:0004587//ornithine-oxo-acid transaminase activity;GO:0030170//pyridoxal phosphate binding	GO:0055129//L-proline biosynthetic process;GO:0019544//arginine catabolic process to glutamate;GO:0006591//ornithine metabolic process;GO:0010121//arginine catabolic process to proline via ornithine;GO:0006527//arginine catabolic process	K00819//ornithine--oxo-acid transaminase [EC:2.6.1.13]	NP_013542.1//ornithine-oxo-acid transaminase [Saccharomyces cerevisiae S288C]
BK006946.2_mrna_4434	504	5856.7	2534.23	-1.20854	2.22e-09	Down	9.42e-11	GO:0005634//nucleus;GO:0005669//transcription factor TFIID complex	GO:0003677//DNA binding;GO:0016757//transferase activity, transferring glycosyl groups;GO:0003712//transcription coregulator activity;GO:0046982//protein heterodimerization activity	GO:0006357//regulation of transcription by RNA polymerase II;GO:0006366//transcription by RNA polymerase II;GO:0051123//RNA polymerase II preinitiation complex assembly	K03127//transcription initiation factor TFIID subunit 13	NP_013611.1//Taf13p [Saccharomyces cerevisiae S288C]
BK006949.2_mrna_6048	933	2224.33	662.146	-1.74815	2.25e-19	Down	5.3e-21	GO:0005743//mitochondrial inner membrane;GO:0016021//integral component of membrane;GO:0005739//mitochondrion	GO:0005313//L-glutamate transmembrane transporter activity;GO:0005310//dicarboxylic acid transmembrane transporter activity;GO:0015183//L-aspartate transmembrane transporter activity;GO:0022857//transmembrane transporter activity	GO:0015810//aspartate transmembrane transport;GO:0015813//L-glutamate transmembrane transport;GO:0043490//malate-aspartate shuttle;GO:0006839//mitochondrial transport	K15110//solute carrier family 25 (mitochondrial 2-oxodicarboxylate transporter), member 21	NP_015191.1//mitochondrial 2-oxodicarboxylate carrier [Saccharomyces cerevisiae S288C]
BK006945.2_mrna_4243	2655	1143.43	2455.86	1.10286	7.04e-07	Up	3.95e-08	GO:0005634//nucleus;GO:0000781//chromosome, telomeric region;GO:0005730//nucleolus;GO:0005697//telomerase holoenzyme complex;GO:0000333//telomerase catalytic core complex	GO:0042162//telomeric DNA binding;GO:0046872//metal ion binding;GO:0003721//telomerase RNA reverse transcriptase activity;GO:0070034//telomerase RNA binding	GO:0001302//replicative cell aging;GO:0007004//telomere maintenance via telomerase	K11126//telomerase reverse transcriptase [EC:2.7.7.49]	AJV47265.1//Est2p [Saccharomyces cerevisiae YJM1133]
BK006944.2_mrna_3668	321	73.2578	23.4098	-1.64587	0.00048201	Down	4.28e-05	GO:0016021//integral component of membrane;GO:0005739//mitochondrion	NA	NA	NA	NP_001257684.1//Mmo1p [Saccharomyces cerevisiae S288C]
BK006946.2_mrna_4702	432	2813.79	12777.7	2.18304	3.73e-25	Up	4.37e-27	GO:0005840//ribosome;GO:0030686//90S preribosome;GO:0022627//cytosolic small ribosomal subunit	GO:0003723//RNA binding;GO:0003735//structural constituent of ribosome	GO:0000462//maturation of SSU-rRNA from tricistronic rRNA transcript (SSU-rRNA, 5.8S rRNA, LSU-rRNA);GO:0006412//translation;GO:0002181//cytoplasmic translation;GO:0006310//DNA recombination	K02960//small subunit ribosomal protein S16e	NP_010200.1//ribosomal 40S subunit protein S16B [Saccharomyces cerevisiae S288C]
BK006943.2_mrna_3159	1602	4914.78	2348.91	-1.06514	0.00772129	Down	0.00103252	GO:0005737//cytoplasm	GO:0004512//inositol-3-phosphate synthase activity	GO:0008654//phospholipid biosynthetic process;GO:0006021//inositol biosynthetic process	K01858//myo-inositol-1-phosphate synthase [EC:5.5.1.4]	NP_012382.2//inositol-3-phosphate synthase INO1 [Saccharomyces cerevisiae S288C]
BK006947.3_mrna_5129	2142	19282.5	8901.71	-1.11513	3.72e-08	Down	1.74e-09	GO:0000329//fungal-type vacuole membrane;GO:0000324//fungal-type vacuole;GO:0016021//integral component of membrane;GO:1990816//vacuole-mitochondrion membrane contact site	GO:0015188//L-isoleucine transmembrane transporter activity;GO:0015186//L-glutamine transmembrane transporter activity;GO:0005302//L-tyrosine transmembrane transporter activity;GO:0015171//amino acid transmembrane transporter activity	GO:0032974//amino acid transmembrane export from vacuole;GO:0003333//amino acid transmembrane transport	K14209//solute carrier family 36 (proton-coupled amino acid transporter)	NP_014298.1//Avt4p [Saccharomyces cerevisiae S288C]
BK006942.2_mrna_3082	1032	22289.5	781.079	-4.83475	5.13e-156	Down	5.15e-159	NA	GO:0004037//allantoicase activity	GO:0006144//purine nucleobase metabolic process;GO:0000256//allantoin catabolic process	K01477//allantoicase [EC:3.5.3.4]	NP_012295.1//allantoicase [Saccharomyces cerevisiae S288C]
BK006945.2_mrna_4334	342	1020.32	7922.2	2.95688	1.72e-39	Up	7.18e-42	GO:0005840//ribosome;GO:0022625//cytosolic large ribosomal subunit	GO:0003735//structural constituent of ribosome	GO:0006412//translation;GO:0002181//cytoplasmic translation;GO:0006450//regulation of translational fidelity	K02910//large subunit ribosomal protein L31e	NP_013510.3//ribosomal 60S subunit protein L31B [Saccharomyces cerevisiae S288C]
BK006941.2_mrna_2296	1002	3626.15	1647.29	-1.13835	0.00181019	Down	0.000193755	GO:0005634//nucleus;GO:0005829//cytosol;GO:0005737//cytoplasm	GO:0004801//sedoheptulose-7-phosphate:D-glyceraldehyde-3-phosphate glyceronetransferase activity	GO:0006098//pentose-phosphate shunt;GO:0005975//carbohydrate metabolic process	K00616//transaldolase [EC:2.2.1.2]	EHN02343.1//YGR043C-like protein [Saccharomyces cerevisiae x Saccharomyces kudriavzevii VIN7]
BK006938.2_mrna_823	363	2326.37	5974.08	1.36063	4.65e-09	Up	2.03e-10	GO:0005840//ribosome;GO:0022625//cytosolic large ribosomal subunit;GO:0030687//preribosome, large subunit precursor	GO:0003729//mRNA binding;GO:0003735//structural constituent of ribosome	GO:0006412//translation;GO:0002181//cytoplasmic translation;GO:0000463//maturation of LSU-rRNA from tricistronic rRNA transcript (SSU-rRNA, 5.8S rRNA, LSU-rRNA)	K02918//large subunit ribosomal protein L35e	NP_010090.1//ribosomal 60S subunit protein L35B [Saccharomyces cerevisiae S288C]
BK006947.3_mrna_5136	573	3333.82	12208.2	1.8726	4.22e-18	Up	1.09e-19	GO:0005840//ribosome;GO:0032040//small-subunit processome;GO:0005730//nucleolus;GO:0022627//cytosolic small ribosomal subunit	GO:0003735//structural constituent of ribosome	GO:0042254//ribosome biogenesis;GO:0006412//translation;GO:0002181//cytoplasmic translation;GO:0042274//ribosomal small subunit biogenesis;GO:0006364//rRNA processing	K02993//small subunit ribosomal protein S7e	NP_014303.3//ribosomal 40S subunit protein S7B [Saccharomyces cerevisiae S288C]
BK006944.2_mrna_3755	1809	127248	14663.2	-3.11738	3.87e-18	Down	9.92e-20	GO:0005783//endoplasmic reticulum;GO:0030134//COPII-coated ER to Golgi transport vesicle;GO:0005768//endosome;GO:0005887//integral component of plasma membrane;GO:0000328//fungal-type vacuole lumen;GO:0016021//integral component of membrane;GO:0005771//multivesicular body;GO:0005789//endoplasmic reticulum membrane;GO:0005886//plasma membrane	GO:0015193//L-proline transmembrane transporter activity;GO:0015203//polyamine transmembrane transporter activity;GO:0015192//L-phenylalanine transmembrane transporter activity;GO:0001761//beta-alanine transmembrane transporter activity;GO:0022857//transmembrane transporter activity;GO:0015171//amino acid transmembrane transporter activity	GO:0015846//polyamine transport;GO:0006865//amino acid transport	K16261//yeast amino acid transporter	NP_012965.3//amino acid permease GAP1 [Saccharomyces cerevisiae S288C]
BK006944.2_mrna_3625	351	1845.94	748.695	-1.30191	1.2e-09	Down	5.07e-11	GO:0005758//mitochondrial intermembrane space;GO:0031966//mitochondrial membrane	GO:0008270//zinc ion binding	GO:0045041//protein import into mitochondrial intermembrane space	NA	NP_012839.1//Hot13p [Saccharomyces cerevisiae S288C]
BK006941.2_mrna_2319	2415	1127.69	340.353	-1.72827	7.63e-24	Down	1.09e-25	GO:0005634//nucleus	GO:0046872//metal ion binding;GO:0043565//sequence-specific DNA binding;GO:0003676//nucleic acid binding	NA	K09466//zinc finger protein ADR1	NP_011581.4//hypothetical protein YGR067C [Saccharomyces cerevisiae S288C]
BK006945.2_mrna_4211	192	3851.83	8550.98	1.15054	5.4e-08	Up	2.6e-09	GO:0005840//ribosome;GO:0010494//cytoplasmic stress granule;GO:0022627//cytosolic small ribosomal subunit	GO:0003735//structural constituent of ribosome	GO:0006412//translation;GO:0002181//cytoplasmic translation	K02983//small subunit ribosomal protein S30e	NP_013390.1//ribosomal 40S subunit protein S30A [Saccharomyces cerevisiae S288C]
BK006941.2_mrna_2307	1725	17552.4	46079.1	1.39244	0.0206754	Up	0.00344993	GO:0005887//integral component of plasma membrane;GO:0000324//fungal-type vacuole;GO:0016021//integral component of membrane;GO:0071944//cell periphery;GO:0005886//plasma membrane	GO:0000102//L-methionine secondary active transmembrane transporter activity;GO:0015179//L-amino acid transmembrane transporter activity;GO:0022857//transmembrane transporter activity	GO:0000101//sulfur amino acid transport;GO:0015821//methionine transport;GO:1903692//methionine import across plasma membrane;GO:0042883//cysteine transport	K19801//phosphatidylinositol 4-kinase B [EC:2.7.1.67];K03293//amino acid transporter, AAT family	NP_011569.1//Mup1p [Saccharomyces cerevisiae S288C]
BK006948.2_mrna_5869	432	2872.82	9881.17	1.78222	1.97e-16	Up	5.56e-18	GO:0005840//ribosome;GO:0022627//cytosolic small ribosomal subunit	GO:0003735//structural constituent of ribosome	GO:0006412//translation;GO:0002181//cytoplasmic translation	K02951//small subunit ribosomal protein S12e	NP_015014.3//ribosomal 40S subunit protein S12 [Saccharomyces cerevisiae S288C]
BK006948.2_mrna_5875	1365	68528.7	25503.6	-1.42601	3.39e-07	Down	1.85e-08	GO:0005634//nucleus;GO:0005829//cytosol;GO:0005737//cytoplasm	GO:0000166//nucleotide binding;GO:0016639//oxidoreductase activity, acting on the CH-NH2 group of donors, NAD or NADP as acceptor;GO:0004354//glutamate dehydrogenase (NADP+) activity	GO:0006520//cellular amino acid metabolic process;GO:0006537//glutamate biosynthetic process;GO:0019676//ammonia assimilation cycle	K00262//glutamate dehydrogenase (NADP+) [EC:1.4.1.4]	NP_015020.3//glutamate dehydrogenase (NADP(+)) GDH1 [Saccharomyces cerevisiae S288C]
BK006938.2_mrna_1183	3972	964.499	452.865	-1.0907	3.02e-05	Down	2.19e-06	GO:0005634//nucleus;GO:0005829//cytosol;GO:0005737//cytoplasm	GO:0000978//RNA polymerase II proximal promoter sequence-specific DNA binding;GO:0000981//DNA-binding transcription factor activity, RNA polymerase II-specific;GO:0001093//TFIIB-class transcription factor binding;GO:0003676//nucleic acid binding;GO:0046872//metal ion binding;GO:0003713//transcription coactivator activity;GO:0043565//sequence-specific DNA binding;GO:0001102//RNA polymerase II acti…	GO:0061410//positive regulation of transcription from RNA polymerase II promoter in response to ethanol;GO:0007031//peroxisome organization;GO:0097235//positive regulation of fatty acid beta-oxidation by positive regulation of transcription from RNA polymerase II promoter;GO:0071400//cellular response to oleic acid;GO:0061424//positive regulation of peroxisome organization by positive regulation …	K09466//zinc finger protein ADR1	NP_010502.3//DNA-binding transcription factor ADR1 [Saccharomyces cerevisiae S288C]
BK006948.2_mrna_5553	453	9334.65	4328.17	-1.10884	6.89e-14	Down	2.2e-15	GO:0005634//nucleus	GO:0008270//zinc ion binding	GO:0071243//cellular response to arsenic-containing substance;GO:0071218//cellular response to misfolded protein	K07059//uncharacterized protein	NP_014695.1//Tmc1p [Saccharomyces cerevisiae S288C]
BK006942.2_mrna_2893	387	4778.09	20026.4	2.06739	5.45e-24	Up	7.48e-26	GO:0005840//ribosome;GO:0005634//nucleus;GO:0022625//cytosolic large ribosomal subunit;GO:0005739//mitochondrion;GO:0005737//cytoplasm	GO:0031386//protein tag;GO:0031625//ubiquitin protein ligase binding;GO:0003735//structural constituent of ribosome	GO:0000055//ribosomal large subunit export from nucleus;GO:0042254//ribosome biogenesis;GO:0006412//translation;GO:0000027//ribosomal large subunit assembly;GO:0016567//protein ubiquitination;GO:0002181//cytoplasmic translation;GO:0019941//modification-dependent protein catabolic process	K08770//ubiquitin C;K02927//large subunit ribosomal protein L40e	NP_012118.1//ubiquitin-ribosomal 60S subunit protein L40A fusion protein [Saccharomyces cerevisiae S288C]
BK006942.2_mrna_3016	429	898.135	2079.78	1.21143	4.46e-08	Up	2.11e-09	GO:0016021//integral component of membrane	NA	NA	NA	NP_012235.3//hypothetical protein YIL029C [Saccharomyces cerevisiae S288C]
BK006939.2_mrna_1678	1329	5336.49	2472.44	-1.10996	1.46e-07	Down	7.38e-09	GO:0005739//mitochondrion	GO:0004315//3-oxoacyl-[acyl-carrier-protein] synthase activity;GO:0016740//transferase activity	GO:0006633//fatty acid biosynthetic process	K09458//3-oxoacyl-[acyl-carrier-protein] synthase II [EC:2.3.1.179]	NP_010983.2//fatty acid synthase CEM1 [Saccharomyces cerevisiae S288C]
BK006949.2_mrna_6104	483	3525.02	11355.4	1.68767	3.45e-14	Up	1.09e-15	GO:0005840//ribosome;GO:0022625//cytosolic large ribosomal subunit	GO:0003735//structural constituent of ribosome	GO:0006412//translation;GO:0002181//cytoplasmic translation	K02889//large subunit ribosomal protein L21e	NP_015246.1//ribosomal 60S subunit protein L21B [Saccharomyces cerevisiae S288C]
BK006945.2_mrna_3845	771	3987.47	14100.1	1.82216	1.93e-12	Up	6.68e-14	GO:0005840//ribosome;GO:1990904//ribonucleoprotein complex;GO:0022625//cytosolic large ribosomal subunit	GO:0003723//RNA binding;GO:0003735//structural constituent of ribosome	GO:0000470//maturation of LSU-rRNA;GO:0042254//ribosome biogenesis;GO:0002181//cytoplasmic translation	K02936//large subunit ribosomal protein L7Ae	NP_013055.1//ribosomal 60S subunit protein L8B [Saccharomyces cerevisiae S288C]
BK006944.2_mrna_3604	1545	29445.9	7979.82	-1.88364	1.94e-21	Down	3.77e-23	GO:0000324//fungal-type vacuole;GO:0005576//extracellular region;GO:0034270//Cvt complex;GO:0005737//cytoplasm	GO:0042802//identical protein binding;GO:0008270//zinc ion binding;GO:0070006//metalloaminopeptidase activity	GO:0032258//protein localization by the Cvt pathway;GO:0007039//protein catabolic process in the vacuole;GO:0015031//protein transport	K01268//aminopeptidase I [EC:3.4.11.22]	NP_012819.1//metalloaminopeptidase APE1 [Saccharomyces cerevisiae S288C]
BK006934.2_mrna_2660	1728	7561.89	3176.64	-1.25125	4.83e-11	Down	1.8e-12	GO:0005759//mitochondrial matrix;GO:0005743//mitochondrial inner membrane;GO:0005739//mitochondrion	GO:0016620//oxidoreductase activity, acting on the aldehyde or oxo group of donors, NAD or NADP as acceptor;GO:0003842//1-pyrroline-5-carboxylate dehydrogenase activity	GO:0006537//glutamate biosynthetic process;GO:0010133//proline catabolic process to glutamate;GO:0006560//proline metabolic process	K00294//1-pyrroline-5-carboxylate dehydrogenase [EC:1.2.1.88]	NP_011902.1//1-pyrroline-5-carboxylate dehydrogenase [Saccharomyces cerevisiae S288C]
BK006940.2_mrna_1919	609	91.7034	42.6908	-1.10305	0.0137131	Down	0.0020518	GO:0016021//integral component of membrane;GO:0005886//plasma membrane;GO:0035838//growing cell tip;GO:0032153//cell division site	NA	NA	NA	NP_116667.1//Dcv1p [Saccharomyces cerevisiae S288C]
BK006949.2_mrna_6321	1470	3592.66	1351.16	-1.41086	2e-17	Down	5.33e-19	GO:0005783//endoplasmic reticulum;GO:0005887//integral component of plasma membrane;GO:0016021//integral component of membrane;GO:0005886//plasma membrane	GO:0008519//ammonium transmembrane transporter activity	GO:0019740//nitrogen utilization;GO:0015696//ammonium transport	K03320//ammonium transporter, Amt family	NP_015464.1//ammonium permease MEP3 [Saccharomyces cerevisiae S288C]
BK006936.2_mrna_417	1134	1010.12	2060.79	1.02868	7.25e-07	Up	4.1e-08	GO:0005743//mitochondrial inner membrane;GO:0016021//integral component of membrane;GO:0005739//mitochondrion	GO:0015218//pyrimidine nucleotide transmembrane transporter activity;GO:0022857//transmembrane transporter activity;GO:0005215//transporter activity	GO:0055085//transmembrane transport;GO:0000002//mitochondrial genome maintenance;GO:0006864//pyrimidine nucleotide transport;GO:0051881//regulation of mitochondrial membrane potential;GO:1990519//pyrimidine nucleotide import into mitochondrion;GO:0070838//divalent metal ion transport	K15116//solute carrier family 25, member 33/36	NP_009751.1//Rim2p [Saccharomyces cerevisiae S288C]
BK006934.2_mrna_2730	558	3217.18	1029.26	-1.64419	2.29e-31	Down	1.49e-33	GO:0005759//mitochondrial matrix;GO:0031314//extrinsic component of mitochondrial inner membrane;GO:0005739//mitochondrion	GO:0008962//phosphatidylglycerophosphatase activity;GO:0016791//phosphatase activity	GO:0032049//cardiolipin biosynthetic process;GO:0046838//phosphorylated carbohydrate dephosphorylation	K01094//phosphatidylglycerophosphatase GEP4 [EC:3.1.3.27]	NP_011968.1//phosphatidylglycerophosphatase [Saccharomyces cerevisiae S288C]
BK006949.2_mrna_5903	1464	984.742	396.675	-1.31179	8.16e-08	Down	4.01e-09	GO:0016020//membrane;GO:0016021//integral component of membrane	NA	NA	NA	NP_015046.1//hypothetical protein YPL277C [Saccharomyces cerevisiae S288C]
BK006943.2_mrna_3400	1362	957.334	291.624	-1.71491	1.84e-16	Down	5.17e-18	GO:0005737//cytoplasm	GO:0046872//metal ion binding;GO:0020037//heme binding;GO:0033754//indoleamine 2,3-dioxygenase activity;GO:0051213//dioxygenase activity	GO:0034354//'de novo' NAD biosynthetic process from tryptophan;GO:0019441//tryptophan catabolic process to kynurenine	K00463//indoleamine 2,3-dioxygenase [EC:1.13.11.52]	NP_012612.3//dioxygenase BNA2 [Saccharomyces cerevisiae S288C]
BK006938.2_mrna_1512	540	2321.68	1038.57	-1.16057	3.25e-07	Down	1.75e-08	GO:0005634//nucleus;GO:0005737//cytoplasm	NA	GO:1990414//replication-born double-strand break repair via sister chromatid exchange;GO:0006312//mitotic recombination	NA	NP_010829.1//Irc4p [Saccharomyces cerevisiae S288C]
BK006947.3_mrna_4988	1728	2300.94	1074.41	-1.09869	0.00451674	Down	0.000544019	GO:0005634//nucleus;GO:0035649//Nrd1 complex	GO:0003723//RNA binding;GO:0003729//mRNA binding;GO:0019904//protein domain specific binding;GO:0001068//transcription regulatory region RNA binding	GO:0042780//tRNA 3'-end processing;GO:0071041//antisense RNA transcript catabolic process;GO:0031126//snoRNA 3'-end processing;GO:0071028//nuclear mRNA surveillance;GO:0031124//mRNA 3'-end processing;GO:0071034//CUT catabolic process;GO:0030847//termination of RNA polymerase II transcription, exosome-dependent;GO:0034472//snRNA 3'-end processing	K15560//protein NRD1	NP_014148.1//Nrd1 complex RNA-binding subunit [Saccharomyces cerevisiae S288C]
BK006941.2_mrna_2375	1479	7153.53	2743.77	-1.3825	4.3e-06	Down	2.75e-07	GO:0005783//endoplasmic reticulum;GO:0005887//integral component of plasma membrane;GO:0016021//integral component of membrane;GO:0005886//plasma membrane	GO:0008519//ammonium transmembrane transporter activity	GO:0019740//nitrogen utilization;GO:0015696//ammonium transport	K03320//ammonium transporter, Amt family	NP_011636.3//ammonium permease MEP1 [Saccharomyces cerevisiae S288C]
BK006949.2_mrna_6222	204	4519.22	10212.8	1.17624	7.34e-08	Up	3.57e-09	GO:0005628//prospore membrane	NA	GO:0030437//ascospore formation	NA	NP_690847.1//Spo24p [Saccharomyces cerevisiae S288C]
BK006948.2_mrna_5334	2904	7066.21	2531.45	-1.48097	1.32e-05	Down	8.89e-07	GO:0009277//fungal-type cell wall;GO:0005576//extracellular region;GO:0071944//cell periphery;GO:0031225//anchored component of membrane	GO:0015926//glucosidase activity	GO:0031505//fungal-type cell wall organization	K22020//mucin-19	NP_014487.1//mannoprotein [Saccharomyces cerevisiae S288C]
BK006948.2_mrna_5794	318	3372.95	16136.4	2.25823	3.31e-22	Up	5.94e-24	GO:0005840//ribosome;GO:0005623//cell;GO:0022627//cytosolic small ribosomal subunit	GO:0003735//structural constituent of ribosome	GO:0034198//cellular response to amino acid starvation;GO:0000028//ribosomal small subunit assembly;GO:0006407//rRNA export from nucleus;GO:0001934//positive regulation of protein phosphorylation;GO:0045860//positive regulation of protein kinase activity;GO:0002181//cytoplasmic translation	K02947//small subunit ribosomal protein S10e	NP_014936.1//ribosomal 40S subunit protein S10A [Saccharomyces cerevisiae S288C]
BK006942.2_mrna_3083	735	5452.12	369.356	-3.88373	2.49e-90	Down	5.01e-93	NA	NA	GO:0006807//nitrogen compound metabolic process	K01464//dihydropyrimidinase [EC:3.5.2.2]	NP_012296.1//Dcg1p [Saccharomyces cerevisiae S288C]
BK006934.2_mrna_2614	417	2045.41	6141.33	1.58616	2.04e-17	Up	5.45e-19	GO:0005840//ribosome;GO:0022625//cytosolic large ribosomal subunit	GO:0003723//RNA binding;GO:0003735//structural constituent of ribosome	GO:0006412//translation;GO:0002181//cytoplasmic translation;GO:0042273//ribosomal large subunit biogenesis;GO:0016236//macroautophagy	K02875//large subunit ribosomal protein L14e	NP_011862.1//ribosomal 60S subunit protein L14B [Saccharomyces cerevisiae S288C]
BK006936.2_mrna_231	5272	97.9888	212.426	1.11627	3.3e-05	Up	2.42e-06	GO:0000943//retrotransposon nucleocapsid;GO:0005634//nucleus;GO:0005737//cytoplasm	GO:0003723//RNA binding;GO:0003677//DNA binding;GO:0008233//peptidase activity;GO:0005524//ATP binding;GO:0004523//RNA-DNA hybrid ribonuclease activity;GO:0004190//aspartic-type endopeptidase activity;GO:0003964//RNA-directed DNA polymerase activity;GO:0003887//DNA-directed DNA polymerase activity;GO:0046872//metal ion binding;GO:0004540//ribonuclease activity	GO:0015074//DNA integration;GO:0032197//transposition, RNA-mediated;GO:0006310//DNA recombination	K14835//25S rRNA (cytosine2870-C5)-methyltransferase [EC:2.1.1.310]	NP_009567.1//gag-pol fusion protein [Saccharomyces cerevisiae S288C]
BK006947.3_mrna_4934	435	1829.99	9309.13	2.34681	1.03e-25	Up	1.13e-27	GO:0005840//ribosome;GO:0022627//cytosolic small ribosomal subunit	GO:0003735//structural constituent of ribosome	GO:0000028//ribosomal small subunit assembly;GO:0006407//rRNA export from nucleus;GO:0006412//translation;GO:0002181//cytoplasmic translation;GO:0042274//ribosomal small subunit biogenesis	K02966//small subunit ribosomal protein S19e	NP_014097.1//ribosomal 40S subunit protein S19B [Saccharomyces cerevisiae S288C]
BK006944.2_mrna_3792	924	1168.81	393.584	-1.5703	2.31e-13	Down	7.63e-15	GO:0005634//nucleus;GO:0005737//cytoplasm;GO:0005773//vacuole	NA	GO:0007039//protein catabolic process in the vacuole;GO:0006109//regulation of carbohydrate metabolic process;GO:0042149//cellular response to glucose starvation	NA	NP_013001.1//hypothetical protein YKR075C [Saccharomyces cerevisiae S288C]
BK006941.2_mrna_2038	1503	51318.4	16592.9	-1.62891	5.1e-09	Down	2.23e-10	GO:0005737//cytoplasm	GO:0047536//2-aminoadipate transaminase activity;GO:0080130//L-phenylalanine:2-oxoglutarate aminotransferase activity;GO:0008793//aromatic-amino-acid:2-oxoglutarate aminotransferase activity;GO:0008483//transaminase activity;GO:0003824//catalytic activity;GO:0030170//pyridoxal phosphate binding	GO:0009094//L-phenylalanine biosynthetic process;GO:0009072//aromatic amino acid family metabolic process;GO:0006571//tyrosine biosynthetic process;GO:0019509//L-methionine salvage from methylthioadenosine;GO:0009074//aromatic amino acid family catabolic process;GO:0009058//biosynthetic process;GO:0009073//aromatic amino acid family biosynthetic process;GO:1901605//alpha-amino acid metabolic proc…	K00838//aromatic amino acid aminotransferase I / 2-aminoadipate transaminase [EC:2.6.1.57 2.6.1.39 2.6.1.27 2.6.1.5]	NP_011313.1//bifunctional 2-aminoadipate transaminase/aromatic-amino-acid:2-oxoglutarate transaminase [Saccharomyces cerevisiae S288C]
BK006939.2_mrna_1690	390	3863.72	1927.79	-1.00304	2.16e-07	Down	1.13e-08	GO:0031310//intrinsic component of vacuolar membrane;GO:0000329//fungal-type vacuole membrane;GO:0005783//endoplasmic reticulum;GO:0033254//vacuolar transporter chaperone complex;GO:0016021//integral component of membrane	GO:0003729//mRNA binding	GO:0006799//polyphosphate biosynthetic process;GO:0006797//polyphosphate metabolic process;GO:0016237//lysosomal microautophagy;GO:0042144//vacuole fusion, non-autophagic;GO:0007034//vacuolar transport	K02212//DNA replication licensing factor MCM4 [EC:3.6.4.12]	NP_010995.1//Vtc1p [Saccharomyces cerevisiae S288C]
BK006941.2_mrna_2093	576	797.777	2967.4	1.89514	2.7e-12	Up	9.54e-14	GO:0005840//ribosome;GO:0022625//cytosolic large ribosomal subunit	GO:0003735//structural constituent of ribosome;GO:0019843//rRNA binding	GO:0006412//translation;GO:0002181//cytoplasmic translation	K02940//large subunit ribosomal protein L9e	NP_011368.3//ribosomal 60S subunit protein L9A [Saccharomyces cerevisiae S288C]
BK006935.2_mrna_93	2064	140.676	502.7	1.83732	1.19e-08	Up	5.38e-10	GO:0005743//mitochondrial inner membrane;GO:0005739//mitochondrion	GO:0016746//transferase activity, transferring acyl groups;GO:0004092//carnitine O-acetyltransferase activity	GO:0009437//carnitine metabolic process;GO:0006631//fatty acid metabolic process;GO:0006066//alcohol metabolic process	K00624//carnitine O-acetyltransferase [EC:2.3.1.7]	NP_009420.1//carnitine O-acetyltransferase YAT1 [Saccharomyces cerevisiae S288C]
BK006943.2_mrna_3426	1737	4447.6	1917.15	-1.21407	3.54e-09	Down	1.52e-10	GO:0000324//fungal-type vacuole;GO:0005829//cytosol;GO:0005737//cytoplasm;GO:0097268//cytoophidium	GO:0005524//ATP binding;GO:0042802//identical protein binding;GO:0003883//CTP synthase activity	GO:0008654//phospholipid biosynthetic process;GO:0006541//glutamine metabolic process;GO:0006241//CTP biosynthetic process;GO:0044210//'de novo' CTP biosynthetic process;GO:0019856//pyrimidine nucleobase biosynthetic process	K01937//CTP synthase [EC:6.3.4.2]	NP_012637.4//CTP synthase URA8 [Saccharomyces cerevisiae S288C]
BK006945.2_mrna_4032	1431	22114.2	1185.74	-4.22111	8.31e-99	Down	1.53e-101	GO:0005759//mitochondrial matrix;GO:0005739//mitochondrion	GO:0004657//proline dehydrogenase activity;GO:0071949//FAD binding	GO:0006562//proline catabolic process;GO:0006537//glutamate biosynthetic process;GO:0010133//proline catabolic process to glutamate	K00318//proline dehydrogenase [EC:1.5.-.-]	NP_013243.1//proline dehydrogenase [Saccharomyces cerevisiae S288C]
BK006944.2_mrna_3532	555	2248.3	13366.9	2.57176	5.51e-33	Up	3.23e-35	GO:0015934//large ribosomal subunit;GO:0022625//cytosolic large ribosomal subunit;GO:0030687//preribosome, large subunit precursor;GO:0005737//cytoplasm	GO:0003735//structural constituent of ribosome	GO:0000448//cleavage in ITS2 between 5.8S rRNA and LSU-rRNA of tricistronic rRNA transcript (SSU-rRNA, 5.8S rRNA, LSU-rRNA);GO:0006412//translation;GO:0002181//cytoplasmic translation	K02880//large subunit ribosomal protein L17e	NP_012741.1//ribosomal 60S subunit protein L17A [Saccharomyces cerevisiae S288C]
BK006943.2_mrna_3275	1905	954.019	347.844	-1.45558	1.4e-18	Down	3.54e-20	GO:0005749//mitochondrial respiratory chain complex II, succinate dehydrogenase complex (ubiquinone);GO:0005743//mitochondrial inner membrane;GO:0005739//mitochondrion;GO:0045282//plasma membrane succinate dehydrogenase complex	GO:0009055//electron transfer activity;GO:0000104//succinate dehydrogenase activity;GO:0050660//flavin adenine dinucleotide binding;GO:0008177//succinate dehydrogenase (ubiquinone) activity	GO:0006099//tricarboxylic acid cycle;GO:0022900//electron transport chain;GO:0006121//mitochondrial electron transport, succinate to ubiquinone;GO:0045333//cellular respiration	K00234//succinate dehydrogenase (ubiquinone) flavoprotein subunit [EC:1.3.5.1]	NP_012490.1//succinate dehydrogenase SDH1b [Saccharomyces cerevisiae S288C]
BK006942.2_mrna_3080	1383	7988.22	452.852	-4.14076	2.16e-198	Down	1.09e-201	GO:0005737//cytoplasm	GO:0004038//allantoinase activity;GO:0008270//zinc ion binding;GO:0016888//endodeoxyribonuclease activity, producing 5'-phosphomonoesters;GO:0050897//cobalt ion binding	GO:0009442//allantoin assimilation pathway;GO:0000256//allantoin catabolic process;GO:0006145//purine nucleobase catabolic process	K01466//allantoinase [EC:3.5.2.5]	NP_012293.3//allantoinase [Saccharomyces cerevisiae S288C]
BK006934.2_mrna_2845	2475	4609.03	2251.33	-1.03369	0.00617987	Down	0.000786955	GO:0005634//nucleus;GO:0000329//fungal-type vacuole membrane;GO:0005737//cytoplasm	GO:0004674//protein serine/threonine kinase activity;GO:0005524//ATP binding	GO:0045945//positive regulation of transcription by RNA polymerase III;GO:0090153//regulation of sphingolipid biosynthetic process;GO:0008361//regulation of cell size;GO:0006468//protein phosphorylation;GO:0035556//intracellular signal transduction;GO:0047484//regulation of response to osmotic stress;GO:0001324//age-dependent response to oxidative stress involved in chronological cell aging;GO:00…	K19800//serine/threonine protein kinase SCH9 [EC:2.7.11.1]	NP_012075.1//serine/threonine protein kinase SCH9 [Saccharomyces cerevisiae S288C]
BK006940.2_mrna_1865	369	1335.37	3740.25	1.48589	5.01e-13	Up	1.68e-14	GO:0005840//ribosome;GO:0022625//cytosolic large ribosomal subunit	GO:0003723//RNA binding;GO:0003735//structural constituent of ribosome	GO:0006412//translation;GO:0002181//cytoplasmic translation	K02891//large subunit ribosomal protein L22e	NP_116619.1//ribosomal 60S subunit protein L22B [Saccharomyces cerevisiae S288C]
BK006941.2_mrna_2208	1515	5243.25	2388.72	-1.13422	9.15e-05	Down	7.15e-06	GO:0005634//nucleus;GO:0005641//nuclear envelope lumen;GO:0005737//cytoplasm	GO:0000978//RNA polymerase II proximal promoter sequence-specific DNA binding;GO:0046872//metal ion binding;GO:0043565//sequence-specific DNA binding;GO:0003676//nucleic acid binding;GO:0001227//DNA-binding transcription repressor activity, RNA polymerase II-specific	GO:0000122//negative regulation of transcription by RNA polymerase II;GO:0043609//regulation of carbon utilization;GO:0045944//positive regulation of transcription by RNA polymerase II;GO:1900436//positive regulation of filamentous growth of a population of unicellular organisms in response to starvation;GO:0005975//carbohydrate metabolic process;GO:0000433//carbon catabolite repression of transc…	K09467//zinc-finger protein CreA/MIG	NP_011480.1//transcription factor MIG1 [Saccharomyces cerevisiae S288C]
BK006941.2_mrna_2512	1284	21571.4	9190.16	-1.23096	1.59e-16	Down	4.41e-18	GO:0005739//mitochondrion	GO:0004775//succinate-CoA ligase (ADP-forming) activity;GO:0000287//magnesium ion binding;GO:0005524//ATP binding	GO:0006099//tricarboxylic acid cycle;GO:0006104//succinyl-CoA metabolic process	K01900//succinyl-CoA synthetase beta subunit [EC:6.2.1.4 6.2.1.5]	NP_011760.3//succinate--CoA ligase (GDP-forming) subunit beta [Saccharomyces cerevisiae S288C]
BK006939.2_ncrna_1765	522	33.0913	132.674	2.00336	5.47e-05	Up	4.11e-06	NA	NA	NA	NA	NA
BK006949.2_mrna_6183	1551	1601.43	4697.57	1.55255	1.03e-10	Up	3.95e-12	GO:0005739//mitochondrion;GO:0005741//mitochondrial outer membrane;GO:0005737//cytoplasm	GO:0051537//2 iron, 2 sulfur cluster binding;GO:0047547//2-methylcitrate dehydratase activity	GO:0019679//propionate metabolic process, methylcitrate cycle;GO:0019541//propionate metabolic process;GO:0019629//propionate catabolic process, 2-methylcitrate cycle	K01720//2-methylcitrate dehydratase [EC:4.2.1.79]	NP_015326.1//putative 2-methylcitrate dehydratase [Saccharomyces cerevisiae S288C]
BK006942.2_mrna_2956	618	2019.87	653.439	-1.62814	7.51e-15	Down	2.29e-16	GO:0005783//endoplasmic reticulum;GO:0000324//fungal-type vacuole;GO:0016021//integral component of membrane;GO:0000328//fungal-type vacuole lumen;GO:0005777//peroxisome	NA	NA	NA	NP_012177.1//hypothetical protein YIL089W [Saccharomyces cerevisiae S288C]
BK006947.3_mrna_5069	321	1975.2	8925.13	2.17588	1.17e-25	Up	1.29e-27	GO:0005840//ribosome;GO:0022625//cytosolic large ribosomal subunit	GO:0003735//structural constituent of ribosome	GO:0046898//response to cycloheximide;GO:0006412//translation;GO:0002181//cytoplasmic translation	K02929//large subunit ribosomal protein L44e	NP_012010.1//ribosomal 60S subunit protein L42B [Saccharomyces cerevisiae S288C]
BK006938.2_mrna_1481	1992	1400.99	3374.97	1.26843	6.71e-08	Up	3.26e-09	GO:0005783//endoplasmic reticulum;GO:0016021//integral component of membrane;GO:0071944//cell periphery;GO:0005739//mitochondrion;GO:0031966//mitochondrial membrane;GO:0005886//plasma membrane;GO:0005935//cellular bud neck	GO:0015193//L-proline transmembrane transporter activity;GO:0015171//amino acid transmembrane transporter activity	GO:0055085//transmembrane transport;GO:0006865//amino acid transport	K16261//yeast amino acid transporter	NP_010796.1//glutamine permease GNP1 [Saccharomyces cerevisiae S288C]
BK006940.2_mrna_1847	483	80.3287	33.1322	-1.27768	0.00413182	Down	0.000486829	GO:0016021//integral component of membrane;GO:0071944//cell periphery;GO:0005886//plasma membrane	NA	GO:0000128//flocculation	NA	NP_116576.1//hypothetical protein YFL051C [Saccharomyces cerevisiae S288C]
BK006938.2_mrna_728	1470	9229.44	1976.06	-2.22361	1.08e-33	Down	6.13e-36	GO:0005737//cytoplasm	GO:0008892//guanine deaminase activity;GO:0008270//zinc ion binding;GO:0016811//hydrolase activity, acting on carbon-nitrogen (but not peptide) bonds, in linear amides	GO:0006147//guanine catabolic process;GO:0046098//guanine metabolic process	K01487//guanine deaminase [EC:3.5.4.3]	NP_010043.1//guanine deaminase [Saccharomyces cerevisiae S288C]
BK006943.2_mrna_3126	156	374.718	1437.29	1.93948	2.12e-10	Up	8.32e-12	GO:0005840//ribosome;GO:0022625//cytosolic large ribosomal subunit	GO:0003735//structural constituent of ribosome	GO:0006412//translation;GO:0002181//cytoplasmic translation	K02924//large subunit ribosomal protein L39e	NP_012346.1//ribosomal 60S subunit protein L39 [Saccharomyces cerevisiae S288C]
BK006939.2_mrna_1811	900	69228.9	32186.2	-1.10493	6.81e-10	Down	2.84e-11	GO:0005829//cytosol;GO:0005737//cytoplasm	GO:0008757//S-adenosylmethionine-dependent methyltransferase activity;GO:0046547//trans-aconitate 3-methyltransferase activity	NA	K22438//trans-aconitate 3-methyltransferase [EC:2.1.1.145]	NP_011102.3//Tmt1p [Saccharomyces cerevisiae S288C]
BK006941.2_mrna_2482	759	2897.04	14082.6	2.28126	1.27e-23	Up	1.86e-25	GO:0010494//cytoplasmic stress granule;GO:0030686//90S preribosome;GO:0022627//cytosolic small ribosomal subunit	GO:0003735//structural constituent of ribosome	GO:0000028//ribosomal small subunit assembly;GO:0006407//rRNA export from nucleus;GO:0006412//translation;GO:0000461//endonucleolytic cleavage to generate mature 3'-end of SSU-rRNA from (SSU-rRNA, 5.8S rRNA, LSU-rRNA);GO:0002181//cytoplasmic translation;GO:0000447//endonucleolytic cleavage in ITS1 to separate SSU-rRNA from 5.8S rRNA and LSU-rRNA from tricistronic rRNA transcript (SSU-rRNA, 5.8S r…	K02998//small subunit ribosomal protein SAe	NP_011730.1//ribosomal 40S subunit protein S0A [Saccharomyces cerevisiae S288C]
BK006949.2_mrna_6240	924	8917.95	4419.04	-1.01298	4.15e-07	Down	2.29e-08	GO:0000324//fungal-type vacuole;GO:0005743//mitochondrial inner membrane;GO:0016021//integral component of membrane;GO:0005739//mitochondrion	GO:0005342//organic acid transmembrane transporter activity;GO:0015187//glycine transmembrane transporter activity;GO:0022857//transmembrane transporter activity	GO:0006839//mitochondrial transport;GO:0006783//heme biosynthetic process;GO:1904983//glycine import into mitochondrion	K15109//solute carrier family 25 (mitochondrial carnitine/acylcarnitine transporter), member 20/29	NP_015383.1//organic acid transporter [Saccharomyces cerevisiae S288C]
BK006936.2_mrna_272	471	1785.18	8276.99	2.21304	3.21e-21	Up	6.35e-23	GO:0005840//ribosome;GO:0030686//90S preribosome;GO:0022627//cytosolic small ribosomal subunit	GO:0003735//structural constituent of ribosome;GO:0019843//rRNA binding	GO:0000028//ribosomal small subunit assembly;GO:0000462//maturation of SSU-rRNA from tricistronic rRNA transcript (SSU-rRNA, 5.8S rRNA, LSU-rRNA);GO:0006412//translation;GO:0002181//cytoplasmic translation	K02949//small subunit ribosomal protein S11e	NP_009604.1//ribosomal 40S subunit protein S11B [Saccharomyces cerevisiae S288C]
BK006937.2_mrna_645	414	2721.04	10778.5	1.98593	2e-19	Up	4.69e-21	GO:0005840//ribosome;GO:0005654//nucleoplasm;GO:0030686//90S preribosome;GO:0032040//small-subunit processome;GO:0005730//nucleolus;GO:0022627//cytosolic small ribosomal subunit	GO:0003723//RNA binding;GO:0003729//mRNA binding;GO:0070181//small ribosomal subunit rRNA binding;GO:0048027//mRNA 5'-UTR binding;GO:0003735//structural constituent of ribosome	GO:0031167//rRNA methylation;GO:0000028//ribosomal small subunit assembly;GO:0000462//maturation of SSU-rRNA from tricistronic rRNA transcript (SSU-rRNA, 5.8S rRNA, LSU-rRNA);GO:0006412//translation;GO:0002181//cytoplasmic translation;GO:0030490//maturation of SSU-rRNA	K02955//small subunit ribosomal protein S14e	NP_009960.2//ribosomal 40S subunit protein S14A [Saccharomyces cerevisiae S288C]
BK006936.2_mrna_282	201	66.4583	27.3695	-1.27988	0.00271169	Down	0.000303177	NA	NA	NA	NA	NP_001257668.1//hypothetical protein YBR056W-A [Saccharomyces cerevisiae S288C]
BK006948.2_mrna_5801	456	4720.45	11987.2	1.3445	7.25e-07	Up	4.09e-08	GO:0005634//nucleus;GO:0005739//mitochondrion	GO:0003713//transcription coactivator activity;GO:0043565//sequence-specific DNA binding	GO:0045944//positive regulation of transcription by RNA polymerase II	K03627//putative transcription factor	NP_014942.4//Mbf1p [Saccharomyces cerevisiae S288C]
BK006939.2_mrna_1530	1773	36950.6	9944.65	-1.8936	3.75e-07	Down	2.06e-08	GO:0045121//membrane raft;GO:0016021//integral component of membrane;GO:0032126//eisosome;GO:0005886//plasma membrane	GO:0015181//arginine transmembrane transporter activity;GO:0022857//transmembrane transporter activity	GO:0006865//amino acid transport	K16261//yeast amino acid transporter	EHN02827.1//Can1p [Saccharomyces cerevisiae x Saccharomyces kudriavzevii VIN7]
BK006947.3_mrna_5221	1839	299.612	71.2284	-2.07257	3.16e-05	Down	2.31e-06	GO:0005628//prospore membrane	NA	NA	K19898//alpha-agglutinin;K01183//chitinase [EC:3.2.1.14]	NP_014380.3//hypothetical protein YNL018C [Saccharomyces cerevisiae S288C]
BK006948.2_mrna_5359	429	4362.06	19008.1	2.12353	3.12e-23	Up	4.96e-25	GO:0005840//ribosome;GO:0022625//cytosolic large ribosomal subunit;GO:0030687//preribosome, large subunit precursor	GO:0003723//RNA binding;GO:0003735//structural constituent of ribosome;GO:0019843//rRNA binding	GO:0006412//translation;GO:0000027//ribosomal large subunit assembly;GO:0002181//cytoplasmic translation	K02893//large subunit ribosomal protein L23Ae	NP_014514.1//ribosomal 60S subunit protein L25 [Saccharomyces cerevisiae S288C]
BK006941.2_mrna_2418	792	7083.04	2810.57	-1.3335	1.05e-05	Down	7e-07	GO:0005634//nucleus;GO:0005737//cytoplasm	NA	NA	NA	NP_011677.3//Rts3p [Saccharomyces cerevisiae S288C]
BK006946.2_mrna_4592	534	760.456	1642.07	1.11058	6.66e-08	Up	3.22e-09	GO:0005634//nucleus;GO:0016021//integral component of membrane	GO:0000981//DNA-binding transcription factor activity, RNA polymerase II-specific;GO:0043565//sequence-specific DNA binding;GO:0000987//proximal promoter sequence-specific DNA binding;GO:0044212//transcription regulatory region DNA binding;GO:0008134//transcription factor binding;GO:0046983//protein dimerization activity	GO:0006525//arginine metabolic process;GO:0045944//positive regulation of transcription by RNA polymerase II;GO:0007275//multicellular organism development;GO:1900079//regulation of arginine biosynthetic process;GO:1900081//regulation of arginine catabolic process	K19808//arginine metabolism regulation protein I	NP_013756.1//Arg80p [Saccharomyces cerevisiae S288C]
BK006946.2_mrna_4731	1521	5716	2490.77	-1.19841	6.08e-11	Down	2.29e-12	GO:0005737//cytoplasm	GO:0016620//oxidoreductase activity, acting on the aldehyde or oxo group of donors, NAD or NADP as acceptor;GO:0043878//glyceraldehyde-3-phosphate dehydrogenase (NAD+) (non-phosphorylating) activity;GO:0004029//aldehyde dehydrogenase (NAD) activity	GO:0006598//polyamine catabolic process;GO:0019483//beta-alanine biosynthetic process;GO:0015940//pantothenate biosynthetic process;GO:0006081//cellular aldehyde metabolic process	K00129//aldehyde dehydrogenase (NAD(P)+) [EC:1.2.1.5]	NP_013893.1//aldehyde dehydrogenase (NAD(+)) ALD2 [Saccharomyces cerevisiae S288C]
BK006949.2_mrna_6223	591	1440.5	455.819	-1.66003	2.63e-18	Down	6.69e-20	GO:0000329//fungal-type vacuole membrane;GO:0000324//fungal-type vacuole;GO:0030176//integral component of endoplasmic reticulum membrane;GO:0016021//integral component of membrane;GO:0005739//mitochondrion	GO:0015035//protein disulfide oxidoreductase activity;GO:0016971//flavin-linked sulfhydryl oxidase activity;GO:0050660//flavin adenine dinucleotide binding;GO:0016972//thiol oxidase activity	GO:0055114//oxidation-reduction process	K17891//FAD-linked sulfhydryl oxidase [EC:1.8.3.2]	NP_015362.1//flavin-linked sulfhydryl oxidase [Saccharomyces cerevisiae S288C]
BK006934.2_mrna_2577	771	3810.05	9136.25	1.26179	1.21e-08	Up	5.52e-10	GO:0005840//ribosome;GO:1990904//ribonucleoprotein complex;GO:0022625//cytosolic large ribosomal subunit	GO:0003723//RNA binding;GO:0003735//structural constituent of ribosome	GO:0000470//maturation of LSU-rRNA;GO:0042254//ribosome biogenesis;GO:0002181//cytoplasmic translation	K02936//large subunit ribosomal protein L7Ae	NP_011830.1//ribosomal 60S subunit protein L8A [Saccharomyces cerevisiae S288C]
BK006936.2_mrna_466	3363	13043	4962.04	-1.39427	1.76e-07	Down	9.09e-09	GO:0000329//fungal-type vacuole membrane;GO:0016021//integral component of membrane;GO:1990816//vacuole-mitochondrion membrane contact site;GO:0031166//integral component of vacuolar membrane	GO:0015379//potassium:chloride symporter activity;GO:0005215//transporter activity	GO:0034486//vacuolar transmembrane transport;GO:0055085//transmembrane transport;GO:0006884//cell volume homeostasis;GO:0055075//potassium ion homeostasis;GO:0006816//calcium ion transport;GO:0006811//ion transport;GO:0055064//chloride ion homeostasis;GO:1990573//potassium ion import across plasma membrane;GO:1902476//chloride transmembrane transport	K14429//solute carrier family 12 (potassium/chloride transporters), member 9	NP_009794.3//Vhc1p [Saccharomyces cerevisiae S288C]
BK006943.2_mrna_3326	282	14.2127	5.41366	-1.39251	0.0332782	Down	0.00637716	GO:0005634//nucleus;GO:0005737//cytoplasm	NA	GO:0055072//iron ion homeostasis	NA	NP_878106.1//Lso1p [Saccharomyces cerevisiae S288C]
BK006946.2_mrna_4701	600	3555.33	15388.1	2.11376	1.55e-22	Up	2.63e-24	GO:0005840//ribosome;GO:0022625//cytosolic large ribosomal subunit	GO:0003735//structural constituent of ribosome	GO:0006412//translation;GO:0002181//cytoplasmic translation;GO:0016236//macroautophagy	K02873//large subunit ribosomal protein L13e	NP_013862.1//ribosomal 60S subunit protein L13B [Saccharomyces cerevisiae S288C]
BK006939.2_mrna_1529	1443	2794.56	1343.61	-1.05651	5.43e-13	Down	1.83e-14	GO:0005774//vacuolar membrane;GO:0005783//endoplasmic reticulum;GO:0016021//integral component of membrane	GO:0015171//amino acid transmembrane transporter activity	GO:0003333//amino acid transmembrane transport	K14997//solute carrier family 38 (sodium-coupled neutral amino acid transporter), member 11	NP_010850.1//Avt2p [Saccharomyces cerevisiae S288C]
BK006935.2_mrna_7	285	97.1064	36.827	-1.3988	0.000160992	Down	1.31e-05	NA	NA	NA	NA	AAC04970.1//Flo9p: Putative cell wall protein involved in flocculation [Saccharomyces cerevisiae]
BK006945.2_mrna_4237	1197	1886.68	318.696	-2.5656	1.01e-32	Down	6.08e-35	GO:0097038//perinuclear endoplasmic reticulum;GO:0016021//integral component of membrane;GO:0005789//endoplasmic reticulum membrane;GO:0034045//phagophore assembly site membrane	GO:0030674//protein binding, bridging	GO:0044804//autophagy of nucleus;GO:0061709//reticulophagy	NA	NP_013415.1//Atg39p [Saccharomyces cerevisiae S288C]
BK006945.2_mrna_3920	615	4914.63	24962.8	2.34463	7.05e-39	Up	3.07e-41	GO:0005840//ribosome;GO:0022625//cytosolic large ribosomal subunit	GO:0003723//RNA binding;GO:0003735//structural constituent of ribosome	GO:0006412//translation;GO:0002181//cytoplasmic translation	K02877//large subunit ribosomal protein L15e	NP_013129.1//ribosomal 60S subunit protein L15A [Saccharomyces cerevisiae S288C]
BK006937.2_mrna_541	1083	1117.49	108.197	-3.36852	1.47e-29	Down	1.15e-31	GO:0042645//mitochondrial nucleoid;GO:0005739//mitochondrion	GO:0003941//L-serine ammonia-lyase activity;GO:0030170//pyridoxal phosphate binding;GO:0004794//L-threonine ammonia-lyase activity	GO:0006520//cellular amino acid metabolic process;GO:0006565//L-serine catabolic process;GO:0006567//threonine catabolic process	K17989//L-serine/L-threonine ammonia-lyase [EC:4.3.1.17 4.3.1.19]	NP_001018030.1//L-serine/L-threonine ammonia-lyase CHA1 [Saccharomyces cerevisiae S288C]
BK006941.2_mrna_2335	525	3915.7	13935.4	1.83141	5.25e-22	Up	1e-23	GO:0005840//ribosome;GO:0005634//nucleus;GO:0022625//cytosolic large ribosomal subunit	GO:0003735//structural constituent of ribosome;GO:0019843//rRNA binding	GO:0006412//translation;GO:0000027//ribosomal large subunit assembly;GO:0002181//cytoplasmic translation	K02868//large subunit ribosomal protein L11e	NP_011599.1//ribosomal 60S subunit protein L11B [Saccharomyces cerevisiae S288C]
BK006943.2_mrna_3470	786	2763.16	14794.3	2.42065	1.01e-28	Up	8.44e-31	GO:0005840//ribosome	GO:0016787//hydrolase activity;GO:0003735//structural constituent of ribosome;GO:0019843//rRNA binding	GO:0006412//translation;GO:0009166//nucleotide catabolic process	K02987//small subunit ribosomal protein S4e	XP_006685622.1//ribosomal protein S4e [Yamadazyma tenuis ATCC 10573]
BK006947.3_mrna_5000	1365	18540.5	6744.82	-1.45883	2.74e-16	Down	7.79e-18	GO:0005739//mitochondrion;GO:0005737//cytoplasm	GO:0003677//DNA binding;GO:0000978//RNA polymerase II proximal promoter sequence-specific DNA binding;GO:0003729//mRNA binding;GO:0003690//double-stranded DNA binding;GO:0003697//single-stranded DNA binding;GO:0004177//aminopeptidase activity;GO:0008234//cysteine-type peptidase activity;GO:0004197//cysteine-type endopeptidase activity	GO:0046677//response to antibiotic;GO:0000122//negative regulation of transcription by RNA polymerase II;GO:0043418//homocysteine catabolic process;GO:0009636//response to toxic substance	K01372//bleomycin hydrolase [EC:3.4.22.40]	NP_014160.2//bleomycin hydrolase [Saccharomyces cerevisiae S288C]
BK006939.2_mrna_1522	1491	24023.9	101242	2.07527	2.87e-26	Up	3.02e-28	GO:0031234//extrinsic component of cytoplasmic side of plasma membrane;GO:0005739//mitochondrion;GO:0005737//cytoplasm	GO:0099615//(D)-2-hydroxyglutarate-pyruvate transhydrogenase activity;GO:0004458//D-lactate dehydrogenase (cytochrome) activity;GO:0051990//(R)-2-hydroxyglutarate dehydrogenase activity;GO:0016491//oxidoreductase activity;GO:0071949//FAD binding	GO:0022904//respiratory electron transport chain;GO:0019516//lactate oxidation;GO:0030447//filamentous growth;GO:0019249//lactate biosynthetic process	K21618//(R)-2-hydroxyglutarate---pyruvate transhydrogenase [EC:1.1.99.40]	NP_010843.1//D-lactate dehydrogenase [Saccharomyces cerevisiae S288C]
BK006939.2_mrna_1668	114	239.855	504.628	1.07306	5.02e-08	Up	2.4e-09	GO:0005783//endoplasmic reticulum;GO:0016021//integral component of membrane;GO:0005789//endoplasmic reticulum membrane	NA	NA	NA	NP_061492.1//hypothetical protein YER053C-A [Saccharomyces cerevisiae S288C]
BK006943.2_mrna_3182	6645	27503.8	5089.51	-2.43403	2.42e-06	Down	1.48e-07	GO:0005829//cytosol;GO:0016021//integral component of membrane;GO:0005739//mitochondrion;GO:0005737//cytoplasm	GO:0046872//metal ion binding;GO:0005524//ATP binding;GO:0016597//amino acid binding;GO:0004151//dihydroorotase activity;GO:0004070//aspartate carbamoyltransferase activity;GO:0004088//carbamoyl-phosphate synthase (glutamine-hydrolyzing) activity	GO:0006228//UTP biosynthetic process;GO:0006541//glutamine metabolic process;GO:0006807//nitrogen compound metabolic process;GO:0044205//'de novo' UMP biosynthetic process;GO:0045984//negative regulation of pyrimidine nucleobase metabolic process;GO:0019240//citrulline biosynthetic process;GO:0006207//'de novo' pyrimidine nucleobase biosynthetic process	K11541//carbamoyl-phosphate synthase / aspartate carbamoyltransferase [EC:6.3.5.5 2.1.3.2]	NP_012405.2//bifunctional carbamoylphosphate synthetase/aspartate transcarbamylase [Saccharomyces cerevisiae S288C]
BK006936.2_mrna_142	603	4532.95	15636.4	1.78639	1.82e-17	Up	4.82e-19	GO:0005840//ribosome;GO:0030686//90S preribosome;GO:0022627//cytosolic small ribosomal subunit	GO:0003735//structural constituent of ribosome	GO:0000462//maturation of SSU-rRNA from tricistronic rRNA transcript (SSU-rRNA, 5.8S rRNA, LSU-rRNA);GO:0006412//translation;GO:0002181//cytoplasmic translation	K02995//small subunit ribosomal protein S8e	NP_009481.1//ribosomal 40S subunit protein S8A [Saccharomyces cerevisiae S288C]
BK006948.2_mrna_5366	561	3452.75	14114.6	2.03137	3.76e-22	Up	6.93e-24	GO:0005840//ribosome;GO:0022625//cytosolic large ribosomal subunit	GO:0003735//structural constituent of ribosome	GO:0006412//translation;GO:0002181//cytoplasmic translation	K02883//large subunit ribosomal protein L18e	NP_014098.1//ribosomal 60S subunit protein L18B [Saccharomyces cerevisiae S288C]
BK006945.2_mrna_4108	267	647.285	3465.51	2.42059	6.8e-24	Up	9.45e-26	GO:0005840//ribosome;GO:0022625//cytosolic large ribosomal subunit;GO:0030687//preribosome, large subunit precursor	GO:0046872//metal ion binding;GO:0003735//structural constituent of ribosome;GO:0019843//rRNA binding	GO:0000448//cleavage in ITS2 between 5.8S rRNA and LSU-rRNA of tricistronic rRNA transcript (SSU-rRNA, 5.8S rRNA, LSU-rRNA);GO:0006412//translation;GO:0002181//cytoplasmic translation	K02922//large subunit ribosomal protein L37e	NP_013286.1//ribosomal 60S subunit protein L37A [Saccharomyces cerevisiae S288C]
BK006948.2_mrna_5500	1437	8560.25	2475.32	-1.79004	3.31e-27	Down	3.16e-29	GO:0005615//extracellular space;GO:0005783//endoplasmic reticulum	GO:0004252//serine-type endopeptidase activity;GO:0008233//peptidase activity	GO:0030163//protein catabolic process	K01336//cerevisin [EC:3.4.21.48]	NP_014645.1//putative subtilisin-like protease YSP3 [Saccharomyces cerevisiae S288C]
BK006948.2_mrna_5850	1884	19206.3	1888.03	-3.34662	3.12e-23	Down	4.99e-25	GO:0016021//integral component of membrane;GO:0005886//plasma membrane	GO:0015193//L-proline transmembrane transporter activity;GO:0015175//neutral amino acid transmembrane transporter activity;GO:0022857//transmembrane transporter activity	GO:0006865//amino acid transport;GO:0015804//neutral amino acid transport;GO:0015824//proline transport;GO:0015812//gamma-aminobutyric acid transport	K16261//yeast amino acid transporter	NP_014993.1//proline permease PUT4 [Saccharomyces cerevisiae S288C]
BK006948.2_mrna_5358	1128	5483.18	1137.89	-2.26865	1.6e-22	Down	2.73e-24	GO:0005634//nucleus	GO:0004674//protein serine/threonine kinase activity;GO:0004693//cyclin-dependent protein serine/threonine kinase activity;GO:0005524//ATP binding;GO:0004672//protein kinase activity	GO:0006508//proteolysis;GO:0006468//protein phosphorylation;GO:0071472//cellular response to salt stress;GO:0034605//cellular response to heat	K22009//protein kinase MCK1;K08286//protein-serine/threonine kinase [EC:2.7.11.-]	NP_014513.1//serine/threonine protein kinase YGK3 [Saccharomyces cerevisiae S288C]
BK006938.2_mrna_1434	111	712.818	345.809	-1.04356	0.00275161	Down	0.000310391	GO:0005783//endoplasmic reticulum;GO:0005576//extracellular region;GO:0005886//plasma membrane	GO:0000772//mating pheromone activity	GO:0000750//pheromone-dependent signal transduction involved in conjugation with cellular fusion	K11235//mating pheromone A-factor	NP_010749.3//mating pheromone a [Saccharomyces cerevisiae S288C]
BK006946.2_mrna_4797	318	4141.85	16188.4	1.96661	2.47e-19	Up	5.86e-21	GO:0005840//ribosome;GO:0005623//cell;GO:0022627//cytosolic small ribosomal subunit	GO:0003735//structural constituent of ribosome	GO:0034198//cellular response to amino acid starvation;GO:0000028//ribosomal small subunit assembly;GO:0006407//rRNA export from nucleus;GO:0001934//positive regulation of protein phosphorylation;GO:0045860//positive regulation of protein kinase activity;GO:0002181//cytoplasmic translation	K02947//small subunit ribosomal protein S10e	NP_013957.1//ribosomal 40S subunit protein S10B [Saccharomyces cerevisiae S288C]
BK006948.2_mrna_5601	984	774.387	1612.35	1.05804	1.64e-07	Up	8.38e-09	GO:0005743//mitochondrial inner membrane;GO:0016021//integral component of membrane;GO:0005739//mitochondrion	GO:0005476//carnitine:acyl carnitine antiporter activity;GO:0022857//transmembrane transporter activity	GO:0006631//fatty acid metabolic process	K15109//solute carrier family 25 (mitochondrial carnitine/acylcarnitine transporter), member 20/29	NP_014743.1//carnitine:acyl carnitine antiporter [Saccharomyces cerevisiae S288C]
BK006939.2_mrna_1773	891	2103.1	872.061	-1.27002	2.9e-05	Down	2.1e-06	GO:0005634//nucleus;GO:0032993//protein-DNA complex	GO:0003905//alkylbase DNA N-glycosylase activity;GO:0052821//DNA-7-methyladenine glycosylase activity;GO:0008725//DNA-3-methyladenine glycosylase activity;GO:0003684//damaged DNA binding;GO:0032131//alkylated DNA binding;GO:0043916//DNA-7-methylguanine glycosylase activity;GO:0052822//DNA-3-methylguanine glycosylase activity	GO:0006307//DNA dealkylation involved in DNA repair;GO:0006285//base-excision repair, AP site formation;GO:0006284//base-excision repair	K01247//DNA-3-methyladenine glycosylase II [EC:3.2.2.21]	NP_011069.1//Mag1p [Saccharomyces cerevisiae S288C]
BK006941.2_mrna_2152	363	55403	17253.2	-1.6831	5.71e-06	Down	3.68e-07	GO:0000324//fungal-type vacuole;GO:0005576//extracellular region	GO:0000772//mating pheromone activity;GO:1903135//cupric ion binding	GO:0007618//mating;GO:0000750//pheromone-dependent signal transduction involved in conjugation with cellular fusion	K11234//mating pheromone alpha-factor	NP_011426.1//Mf(alpha)2p [Saccharomyces cerevisiae S288C]
BK006942.2_mrna_2994	858	5632.33	2388.48	-1.23764	4.88e-05	Down	3.64e-06	GO:0005634//nucleus;GO:0000307//cyclin-dependent protein kinase holoenzyme complex;GO:0005737//cytoplasm	GO:0016538//cyclin-dependent protein serine/threonine kinase regulator activity;GO:0019901//protein kinase binding	GO:0005977//glycogen metabolic process;GO:0005979//regulation of glycogen biosynthetic process;GO:0031647//regulation of protein stability;GO:0005981//regulation of glycogen catabolic process;GO:0051301//cell division;GO:0007049//cell cycle;GO:0000079//regulation of cyclin-dependent protein serine/threonine kinase activity	K20032//palmitoyltransferase ZDHHC13/17 [EC:2.3.1.225];K06654//phosphate system cyclin PHO80;K14213//Xaa-Pro dipeptidase [EC:3.4.13.9]	NP_012214.3//Pcl7p [Saccharomyces cerevisiae S288C]
BK006938.2_mrna_1025	456	2444.04	9950.59	2.02551	8.02e-24	Up	1.17e-25	GO:0005840//ribosome;GO:0030686//90S preribosome;GO:0005730//nucleolus;GO:0022627//cytosolic small ribosomal subunit	GO:0070181//small ribosomal subunit rRNA binding;GO:0003735//structural constituent of ribosome	GO:0000462//maturation of SSU-rRNA from tricistronic rRNA transcript (SSU-rRNA, 5.8S rRNA, LSU-rRNA);GO:0006412//translation;GO:0002181//cytoplasmic translation	K02953//small subunit ribosomal protein S13e	NP_010349.3//ribosomal 40S subunit protein S13 [Saccharomyces cerevisiae S288C]
BK006949.2_mrna_5983	735	1256.76	5882.25	2.22666	1.84e-25	Up	2.1e-27	GO:0005840//ribosome;GO:0005730//nucleolus;GO:0022625//cytosolic large ribosomal subunit;GO:0005737//cytoplasm	GO:0003735//structural constituent of ribosome	GO:0000470//maturation of LSU-rRNA;GO:0002181//cytoplasmic translation;GO:0000463//maturation of LSU-rRNA from tricistronic rRNA transcript (SSU-rRNA, 5.8S rRNA, LSU-rRNA);GO:0042273//ribosomal large subunit biogenesis	K02937//large subunit ribosomal protein L7e	NP_015126.1//ribosomal 60S subunit protein L7B [Saccharomyces cerevisiae S288C]
BK006945.2_mrna_4379	531	1828.34	8709.82	2.25211	6.41e-21	Up	1.32e-22	GO:0005840//ribosome;GO:0022625//cytosolic large ribosomal subunit	GO:0003723//RNA binding;GO:0003735//structural constituent of ribosome	GO:0006412//translation;GO:0000027//ribosomal large subunit assembly;GO:0002181//cytoplasmic translation	K02934//large subunit ribosomal protein L6e	NP_013553.1//ribosomal 60S subunit protein L6B [Saccharomyces cerevisiae S288C]
BK006942.2_mrna_3081	1908	62448.7	362.94	-7.42679	0	Down	0	GO:0016020//membrane;GO:0000324//fungal-type vacuole;GO:0016021//integral component of membrane;GO:0005886//plasma membrane	GO:0015205//nucleobase transmembrane transporter activity;GO:0005274//allantoin:proton symporter activity;GO:0022857//transmembrane transporter activity	GO:0015720//allantoin transport;GO:0006144//purine nucleobase metabolic process;GO:0000256//allantoin catabolic process	K03457//nucleobase:cation symporter-1, NCS1 family	NP_012294.3//allantoin permease [Saccharomyces cerevisiae S288C]
BK006938.2_mrna_737	1842	5359.25	11524.6	1.10462	0.000122008	Up	9.76e-06	GO:0010494//cytoplasmic stress granule;GO:0005829//cytosol;GO:0005737//cytoplasm;GO:0005844//polysome	GO:0016787//hydrolase activity;GO:0005524//ATP binding;GO:0051082//unfolded protein binding;GO:0005516//calmodulin binding;GO:0016887//ATPase activity	GO:0006415//translational termination;GO:0000054//ribosomal subunit export from nucleus;GO:0002181//cytoplasmic translation;GO:0006364//rRNA processing;GO:0006450//regulation of translational fidelity;GO:0042149//cellular response to glucose starvation;GO:0051083//'de novo' cotranslational protein folding;GO:0006452//translational frameshifting;GO:0006412//translation	K03283//heat shock 70kDa protein 1/2/6/8	XP_445408.1//uncharacterized protein CAGL0C05379g [[Candida] glabrata]
BK006949.2_mrna_6312	438	3012.36	10090.5	1.74403	4.95e-15	Up	1.5e-16	GO:0022627//cytosolic small ribosomal subunit;GO:0015935//small ribosomal subunit	GO:0003735//structural constituent of ribosome	GO:0000462//maturation of SSU-rRNA from tricistronic rRNA transcript (SSU-rRNA, 5.8S rRNA, LSU-rRNA);GO:1990145//maintenance of translational fidelity;GO:0006412//translation;GO:0006450//regulation of translational fidelity	K02973//small subunit ribosomal protein S23e	NP_015457.1//ribosomal 40S subunit protein S23B [Saccharomyces cerevisiae S288C]
BK006939.2_mrna_1676	1587	1572.73	707.419	-1.15264	2.12e-07	Down	1.1e-08	GO:0016021//integral component of membrane;GO:0005886//plasma membrane	GO:0015205//nucleobase transmembrane transporter activity;GO:0022857//transmembrane transporter activity	GO:0072530//purine-containing compound transmembrane transport;GO:0015856//cytosine transport	K13953//alcohol dehydrogenase, propanol-preferring [EC:1.1.1.1]	NP_010981.3//purine-cytosine permease [Saccharomyces cerevisiae S288C]
BK006938.2_mrna_911	522	7514.41	3655.43	-1.03962	4.59e-07	Down	2.54e-08	GO:0000324//fungal-type vacuole;GO:0005623//cell;GO:0000328//fungal-type vacuole lumen	NA	GO:0032366//intracellular sterol transport	NA	NP_010237.1//sterol transporter [Saccharomyces cerevisiae S288C]
BK006946.2_mrna_4713	1644	6971.7	3232.34	-1.10893	7.45e-11	Down	2.82e-12	GO:0000324//fungal-type vacuole;GO:0016021//integral component of membrane	NA	NA	K15451//tRNA wybutosine-synthesizing protein 4 [EC:2.1.1.290 2.3.1.231]	NP_013876.1//hypothetical protein YMR155W [Saccharomyces cerevisiae S288C]
BK006944.2_mrna_3815	1650	1809.1	678.826	-1.41416	2.9e-10	Down	1.16e-11	GO:0005829//cytosol	GO:0005524//ATP binding;GO:0016301//kinase activity;GO:0004612//phosphoenolpyruvate carboxykinase (ATP) activity	GO:0006094//gluconeogenesis	K01610//phosphoenolpyruvate carboxykinase (ATP) [EC:4.1.1.49]	NP_013023.3//phosphoenolpyruvate carboxykinase PCK1 [Saccharomyces cerevisiae S288C]
BK006941.2_mrna_2427	336	12.973	36.9071	1.50839	0.00324745	Up	0.000372302	NA	NA	NA	NA	NP_001335783.1//hypothetical protein YGR164W [Saccharomyces cerevisiae S288C]
BK006943.2_mrna_3294	336	18.2334	6.4729	-1.4941	0.0125929	Down	0.00185258	GO:0016021//integral component of membrane	GO:0043022//ribosome binding	NA	NA	NP_012506.1//hypothetical protein YJL028W [Saccharomyces cerevisiae S288C]
BK006943.2_mrna_3207	1938	726.521	1685.66	1.21424	2.52e-14	Up	7.89e-16	GO:0005634//nucleus;GO:0005737//cytoplasm	GO:0004674//protein serine/threonine kinase activity;GO:0005524//ATP binding;GO:0004672//protein kinase activity	GO:0030435//sporulation resulting in formation of a cellular spore;GO:0010468//regulation of gene expression;GO:0051321//meiotic cell cycle;GO:0040020//regulation of meiotic nuclear division;GO:0006468//protein phosphorylation;GO:1902596//negative regulation of DNA replication origin binding;GO:0035556//intracellular signal transduction	K12765//meiosis induction protein kinase IME2/SME1 [EC:2.7.11.1]	NP_012429.1//protein kinase IME2 [Saccharomyces cerevisiae S288C]
BK006947.3_mrna_5309	819	5928.46	2081.41	-1.5101	2.96e-20	Down	6.52e-22	GO:0000151//ubiquitin ligase complex	GO:0034450//ubiquitin-ubiquitin ligase activity	GO:0006513//protein monoubiquitination;GO:0000209//protein polyubiquitination	NA	EGA80995.1//Bsc5p [Saccharomyces cerevisiae Lalvin QA23]
BK006938.2_mrna_1002	603	186.395	79.2294	-1.23425	0.0185264	Down	0.00301694	NA	NA	NA	NA	NP_010327.3//hypothetical protein YDR042C [Saccharomyces cerevisiae S288C]
BK006936.2_mrna_514	2394	434.473	205.255	-1.08185	3.99e-05	Down	2.95e-06	GO:0016021//integral component of membrane	GO:0003876//AMP deaminase activity	GO:0032264//IMP salvage	K01490//AMP deaminase [EC:3.5.4.6]	NP_009843.3//metallo-dependent hydrolase superfamily protein [Saccharomyces cerevisiae S288C]
BK006941.2_mrna_1992	1110	4455.73	9167.08	1.0408	1.11e-12	Up	3.77e-14	NA	GO:0004115//3',5'-cyclic-AMP phosphodiesterase activity;GO:0047555//3',5'-cyclic-GMP phosphodiesterase activity	GO:0006198//cAMP catabolic process;GO:0046069//cGMP catabolic process;GO:0019933//cAMP-mediated signaling	K01120//3',5'-cyclic-nucleotide phosphodiesterase [EC:3.1.4.17]	NP_011266.1//3',5'-cyclic-nucleotide phosphodiesterase PDE1 [Saccharomyces cerevisiae S288C]
BK006936.2_mrna_416	483	2483.73	14788.3	2.57388	4.2e-30	Up	3.09e-32	GO:0005840//ribosome;GO:0022625//cytosolic large ribosomal subunit	GO:0003735//structural constituent of ribosome	GO:0006412//translation;GO:0002181//cytoplasmic translation	K02889//large subunit ribosomal protein L21e	NP_009750.1//ribosomal 60S subunit protein L21A [Saccharomyces cerevisiae S288C]
BK006936.2_mrna_129	414	1167.27	4952.52	2.08502	1.07e-20	Up	2.26e-22	GO:0005840//ribosome;GO:0005634//nucleus;GO:0005829//cytosol;GO:0022625//cytosolic large ribosomal subunit	GO:0003735//structural constituent of ribosome;GO:0070180//large ribosomal subunit rRNA binding	GO:0006412//translation;GO:0002181//cytoplasmic translation	K02894//large subunit ribosomal protein L23e	NP_009466.1//ribosomal 60S subunit protein L23A [Saccharomyces cerevisiae S288C]
BK006949.2_mrna_6220	1113	50437.2	14190	-1.82961	3.51e-07	Down	1.92e-08	GO:0034399//nuclear periphery;GO:0005737//cytoplasm	GO:0004356//glutamate-ammonia ligase activity;GO:0005524//ATP binding	GO:0006542//glutamine biosynthetic process	K01915//glutamine synthetase [EC:6.3.1.2]	XP_003674410.1//hypothetical protein NCAS_0A14730 [Naumovozyma castellii CBS 4309]
BK006936.2_mrna_266	2070	20962	5212.74	-2.00766	7.59e-41	Down	2.92e-43	GO:0005887//integral component of plasma membrane;GO:0016021//integral component of membrane;GO:0071944//cell periphery;GO:0005886//plasma membrane	GO:0015203//polyamine transmembrane transporter activity;GO:0015238//drug transmembrane transporter activity	GO:0030476//ascospore wall assembly;GO:0055085//transmembrane transport;GO:0010509//polyamine homeostasis;GO:0006855//drug transmembrane transport	K08158//MFS transporter, DHA1 family, multidrug resistance protein;K01426//amidase [EC:3.5.1.4];K17617//CTD nuclear envelope phosphatase 1 [EC:3.1.3.16]	NP_009599.2//Qdr3p [Saccharomyces cerevisiae S288C]
BK006939.2_mrna_1540	498	1895.81	8406.65	2.14872	6.83e-23	Up	1.12e-24	GO:0005840//ribosome;GO:0015934//large ribosomal subunit;GO:0022625//cytosolic large ribosomal subunit	GO:0003735//structural constituent of ribosome;GO:0070180//large ribosomal subunit rRNA binding;GO:0019843//rRNA binding	GO:0006412//translation;GO:0000027//ribosomal large subunit assembly;GO:0002181//cytoplasmic translation	K02870//large subunit ribosomal protein L12e	NP_010860.1//ribosomal 60S subunit protein L12A [Saccharomyces cerevisiae S288C]
BK006941.2_mrna_2556	1755	461.323	224.304	-1.04032	2.53e-05	Down	1.81e-06	GO:0005886//plasma membrane	GO:0032450//maltose alpha-glucosidase activity;GO:0004556//alpha-amylase activity;GO:0004575//sucrose alpha-glucosidase activity;GO:0003824//catalytic activity;GO:0004558//alpha-1,4-glucosidase activity;GO:0033934//glucan 1,4-alpha-maltotriohydrolase activity;GO:0004574//oligo-1,6-glucosidase activity	GO:0009313//oligosaccharide catabolic process;GO:0046352//disaccharide catabolic process;GO:0005975//carbohydrate metabolic process;GO:0005987//sucrose catabolic process;GO:0000025//maltose catabolic process	K01182//oligo-1,6-glucosidase [EC:3.2.1.10]	NP_011808.3//alpha-glucosidase MAL12 [Saccharomyces cerevisiae S288C]
BK006948.2_mrna_5477	1656	17439.1	4981.92	-1.80755	1.07e-15	Down	3.08e-17	GO:0005774//vacuolar membrane;GO:0000324//fungal-type vacuole;GO:0016021//integral component of membrane;GO:0071944//cell periphery;GO:0005886//plasma membrane;GO:0035838//growing cell tip;GO:0032153//cell division site	NA	NA	NA	NP_014623.1//hypothetical protein YOL019W [Saccharomyces cerevisiae S288C]
BK006936.2_mrna_481	1572	855.283	347.79	-1.29818	9.5e-07	Down	5.44e-08	NA	NA	GO:0030435//sporulation resulting in formation of a cellular spore;GO:0051321//meiotic cell cycle	NA	NP_009809.1//Spo23p [Saccharomyces cerevisiae S288C]
BK006949.2_mrna_6130	906	12952.6	1297.85	-3.31904	4.71e-45	Down	1.5e-47	NA	GO:0046872//metal ion binding	NA	K14404//cleavage and polyadenylation specificity factor subunit 4	NP_015271.1//Lee1p [Saccharomyces cerevisiae S288C]
BK006934.2_mrna_2718	336	524.619	1246.33	1.24834	0.000114727	Up	9.12e-06	GO:0005634//nucleus;GO:0005737//cytoplasm	NA	GO:0016070//RNA metabolic process;GO:0006364//rRNA processing	NA	NP_011955.1//Rtc3p [Saccharomyces cerevisiae S288C]
BK006948.2_mrna_5846	876	3979.25	1332.29	-1.57859	2.11e-12	Down	7.34e-14	GO:0000790//nuclear chromatin	GO:0043565//sequence-specific DNA binding;GO:0003700//DNA-binding transcription factor activity;GO:0046983//protein dimerization activity	GO:0045821//positive regulation of glycolytic process;GO:0006355//regulation of transcription, DNA-templated;GO:0006351//transcription, DNA-templated	K09074//fungal twist-like factor	NP_014989.3//Tye7p [Saccharomyces cerevisiae S288C]
BK006945.2_mrna_4249	237	1251.05	5126.08	2.03472	3.15e-22	Up	5.59e-24	GO:0005840//ribosome;GO:0022625//cytosolic large ribosomal subunit	GO:0003735//structural constituent of ribosome	GO:0006412//translation;GO:0002181//cytoplasmic translation	K02923//large subunit ribosomal protein L38e	NP_013429.1//ribosomal 60S subunit protein L38 [Saccharomyces cerevisiae S288C]
BK006943.2_mrna_3136	555	1188.59	6953.08	2.54839	1.12e-29	Up	8.42e-32	GO:0015934//large ribosomal subunit;GO:0022625//cytosolic large ribosomal subunit;GO:0030687//preribosome, large subunit precursor;GO:0005737//cytoplasm	GO:0003735//structural constituent of ribosome	GO:0000448//cleavage in ITS2 between 5.8S rRNA and LSU-rRNA of tricistronic rRNA transcript (SSU-rRNA, 5.8S rRNA, LSU-rRNA);GO:0006412//translation;GO:0002181//cytoplasmic translation	K02880//large subunit ribosomal protein L17e	NP_012358.1//ribosomal 60S subunit protein L17B [Saccharomyces cerevisiae S288C]
BK006943.2_mrna_3203	1656	13380.3	6175.06	-1.11558	3.67e-10	Down	1.49e-11	GO:0005634//nucleus	GO:0000978//RNA polymerase II proximal promoter sequence-specific DNA binding;GO:0000981//DNA-binding transcription factor activity, RNA polymerase II-specific;GO:0008270//zinc ion binding;GO:0043565//sequence-specific DNA binding;GO:0003700//DNA-binding transcription factor activity	GO:0000122//negative regulation of transcription by RNA polymerase II;GO:0090295//nitrogen catabolite repression of transcription;GO:0051457//maintenance of protein location in nucleus	K09184//GATA-binding protein, other eukaryote	NP_012425.1//Gzf3p [Saccharomyces cerevisiae S288C]
BK006938.2_mrna_900	987	3134.14	1548.81	-1.01691	1.68e-08	Down	7.74e-10	GO:0016020//membrane	GO:0047372//acylglycerol lipase activity	NA	NA	NP_010226.1//hypothetical protein YDL057W [Saccharomyces cerevisiae S288C]
BK006938.2_mrna_1000	3276	26145.1	10129.2	-1.36803	8.38e-11	Down	3.18e-12	GO:0000324//fungal-type vacuole;GO:0016021//integral component of membrane;GO:0071944//cell periphery;GO:0005886//plasma membrane	GO:0008554//sodium-exporting ATPase activity, phosphorylative mechanism;GO:0005524//ATP binding;GO:0008556//potassium-transporting ATPase activity;GO:0008553//proton-exporting ATPase activity, phosphorylative mechanism	GO:0006972//hyperosmotic response;GO:0055085//transmembrane transport;GO:0006813//potassium ion transport;GO:0009268//response to pH;GO:0009651//response to salt stress;GO:0006814//sodium ion transport;GO:0042149//cellular response to glucose starvation	K01536//P-type Na+/K+ transporter [EC:7.2.2.3 7.2.2.-]	NP_010325.1//Na(+)/Li(+)-exporting P-type ATPase ENA1 [Saccharomyces cerevisiae S288C]
BK006949.2_mrna_6384	2634	3581.94	802.8	-2.15763	3.07e-23	Down	4.78e-25	GO:0000138//Golgi trans cisterna;GO:0005887//integral component of plasma membrane;GO:0000324//fungal-type vacuole;GO:0016021//integral component of membrane;GO:0005777//peroxisome;GO:0005886//plasma membrane	GO:0035673//oligopeptide transmembrane transporter activity	GO:0055085//transmembrane transport;GO:0044088//regulation of vacuole organization;GO:0006857//oligopeptide transport;GO:0061091//regulation of phospholipid translocation;GO:0051515//positive regulation of monopolar cell growth;GO:0042144//vacuole fusion, non-autophagic;GO:0015031//protein transport;GO:0045454//cell redox homeostasis	NA	NP_015520.1//Opt2p [Saccharomyces cerevisiae S288C]
BK006944.2_mrna_3793	1113	2929.79	1290.42	-1.18296	6.81e-07	Down	3.8e-08	GO:0005737//cytoplasm	GO:0004364//glutathione transferase activity;GO:0045174//glutathione dehydrogenase (ascorbate) activity	GO:0006749//glutathione metabolic process;GO:0071555//cell wall organization	K07393//glutathionyl-hydroquinone reductase [EC:1.8.5.7]	NP_013002.3//S-glutathionyl-(chloro)hydroquinone reductase [Saccharomyces cerevisiae S288C]
BK006949.2_mrna_6350	2709	8329.47	2603.65	-1.67769	1.61e-11	Down	5.85e-13	GO:0005737//cytoplasm	GO:0102250//linear malto-oligosaccharide phosphorylase activity;GO:0030170//pyridoxal phosphate binding;GO:0008184//glycogen phosphorylase activity;GO:0102499//SHG alpha-glucan phosphorylase activity	GO:0005980//glycogen catabolic process;GO:0005975//carbohydrate metabolic process	K00688//glycogen phosphorylase [EC:2.4.1.1]	NP_015486.1//glycogen phosphorylase [Saccharomyces cerevisiae S288C]
BK006946.2_mrna_4788	1515	13074.6	5791.87	-1.17466	1.16e-09	Down	4.88e-11	GO:0000329//fungal-type vacuole membrane;GO:0000324//fungal-type vacuole;GO:0016021//integral component of membrane;GO:0005739//mitochondrion	NA	GO:0055085//transmembrane transport	NA	NP_013948.1//Fmp42p [Saccharomyces cerevisiae S288C]
BK006944.2_mrna_3811	387	2892.03	11669.1	2.01253	7.7e-20	Up	1.77e-21	GO:0005840//ribosome;GO:0005634//nucleus;GO:0022625//cytosolic large ribosomal subunit;GO:0005739//mitochondrion;GO:0005737//cytoplasm	GO:0031386//protein tag;GO:0031625//ubiquitin protein ligase binding;GO:0003735//structural constituent of ribosome	GO:0000055//ribosomal large subunit export from nucleus;GO:0042254//ribosome biogenesis;GO:0006412//translation;GO:0000027//ribosomal large subunit assembly;GO:0016567//protein ubiquitination;GO:0002181//cytoplasmic translation;GO:0019941//modification-dependent protein catabolic process	K08770//ubiquitin C;K02927//large subunit ribosomal protein L40e	NP_012118.1//ubiquitin-ribosomal 60S subunit protein L40A fusion protein [Saccharomyces cerevisiae S288C]
BK006944.2_mrna_3494	945	5139.57	1299.21	-1.98401	0.00058544	Down	5.35e-05	GO:0019898//extrinsic component of membrane;GO:0005737//cytoplasm	GO:0004152//dihydroorotate dehydrogenase activity;GO:1990663//dihydroorotate dehydrogenase (fumarate) activity	GO:0044205//'de novo' UMP biosynthetic process;GO:0006207//'de novo' pyrimidine nucleobase biosynthetic process	K00226//dihydroorotate dehydrogenase (fumarate) [EC:1.3.98.1]	NP_012706.1//dihydroorotate dehydrogenase [Saccharomyces cerevisiae S288C]
BK006938.2_mrna_896	171	858.479	3243.77	1.91782	2.43e-15	Up	7.18e-17	GO:0005840//ribosome;GO:0022627//cytosolic small ribosomal subunit	GO:0008270//zinc ion binding;GO:0003735//structural constituent of ribosome	GO:0006412//translation;GO:0002181//cytoplasmic translation	K02980//small subunit ribosomal protein S29e	NP_010222.1//ribosomal 40S subunit protein S29B [Saccharomyces cerevisiae S288C]
BK006943.2_mrna_3124	417	695.883	2375.7	1.77143	1.71e-08	Up	7.94e-10	GO:0005840//ribosome;GO:0032040//small-subunit processome;GO:0005730//nucleolus;GO:0022627//cytosolic small ribosomal subunit	GO:0003723//RNA binding;GO:0070181//small ribosomal subunit rRNA binding;GO:0048027//mRNA 5'-UTR binding;GO:0003735//structural constituent of ribosome	GO:0000028//ribosomal small subunit assembly;GO:0000462//maturation of SSU-rRNA from tricistronic rRNA transcript (SSU-rRNA, 5.8S rRNA, LSU-rRNA);GO:0006412//translation;GO:0002181//cytoplasmic translation;GO:0030490//maturation of SSU-rRNA	K02955//small subunit ribosomal protein S14e	NP_012344.1//ribosomal 40S subunit protein S14B [Saccharomyces cerevisiae S288C]
BK006941.2_mrna_2212	468	2444.34	15120.6	2.629	2.41e-24	Up	3.22e-26	GO:0005840//ribosome;GO:0022625//cytosolic large ribosomal subunit	GO:0003723//RNA binding;GO:0003735//structural constituent of ribosome	GO:1902626//assembly of large subunit precursor of preribosome;GO:0006412//translation;GO:0000027//ribosomal large subunit assembly;GO:0002181//cytoplasmic translation	K02896//large subunit ribosomal protein L24e	NP_011484.1//ribosomal 60S subunit protein L24A [Saccharomyces cerevisiae S288C]
BK006941.2_mrna_2270	327	4165.65	15847.4	1.92764	4.22e-21	Up	8.49e-23	GO:0005840//ribosome;GO:0022627//cytosolic small ribosomal subunit	GO:0003735//structural constituent of ribosome	GO:0002181//cytoplasmic translation	K02975//small subunit ribosomal protein S25e	NP_011541.1//ribosomal 40S subunit protein S25A [Saccharomyces cerevisiae S288C]
BK006947.3_mrna_5055	723	3778.4	18486.4	2.29061	2.1e-28	Up	1.8e-30	GO:0005634//nucleus;GO:0030686//90S preribosome;GO:0030688//preribosome, small subunit precursor;GO:0022627//cytosolic small ribosomal subunit;GO:0015935//small ribosomal subunit	GO:0003723//RNA binding;GO:0003906//DNA-(apurinic or apyrimidinic site) endonuclease activity;GO:0003684//damaged DNA binding;GO:0032357//oxidized purine DNA binding;GO:0003735//structural constituent of ribosome;GO:0034236//protein kinase A catalytic subunit binding;GO:0008534//oxidized purine nucleobase lesion DNA N-glycosylase activity	GO:0006281//DNA repair;GO:0006407//rRNA export from nucleus;GO:0000056//ribosomal small subunit export from nucleus;GO:0006412//translation;GO:0045739//positive regulation of DNA repair;GO:0002181//cytoplasmic translation	K02985//small subunit ribosomal protein S3e	NP_014221.3//ribosomal 40S subunit protein S3 [Saccharomyces cerevisiae S288C]
BK006948.2_mrna_5483	192	12.075	58.2982	2.27142	8.22e-07	Up	4.68e-08	GO:0016021//integral component of membrane	NA	NA	NA	NP_878166.1//hypothetical protein YOL013W-A [Saccharomyces cerevisiae S288C]
BK006945.2_mrna_4233	264	115.06	25.1378	-2.19446	1.4e-07	Down	7.07e-09	NA	NA	NA	NA	NP_878131.1//hypothetical protein YLR307C-A [Saccharomyces cerevisiae S288C]
BK006941.2_mrna_2281	5688	5584.78	2176.32	-1.35961	5.11e-10	Down	2.1e-11	GO:0016021//integral component of membrane;GO:0000148//1,3-beta-D-glucan synthase complex;GO:0005628//prospore membrane	GO:0003843//1,3-beta-D-glucan synthase activity	GO:0030476//ascospore wall assembly;GO:0006075//(1->3)-beta-D-glucan biosynthetic process	K00706//1,3-beta-glucan synthase [EC:2.4.1.34]	EJS43694.1//gsc2p [Saccharomyces arboricola H-6]
BK006945.2_mrna_4373	768	10533	35185.2	1.74005	2.41e-17	Up	6.5e-19	GO:0030686//90S preribosome;GO:0005829//cytosol;GO:0022627//cytosolic small ribosomal subunit	GO:0003735//structural constituent of ribosome	GO:0000462//maturation of SSU-rRNA from tricistronic rRNA transcript (SSU-rRNA, 5.8S rRNA, LSU-rRNA);GO:0006412//translation;GO:0002181//cytoplasmic translation	K02984//small subunit ribosomal protein S3Ae	NP_013546.1//ribosomal 40S subunit protein S1A [Saccharomyces cerevisiae S288C]
BK006945.2_mrna_3869	2214	3654.13	1804.4	-1.01801	0.00158284	Down	0.000166629	GO:0005634//nucleus;GO:0005737//cytoplasm	GO:0004713//protein tyrosine kinase activity;GO:0004712//protein serine/threonine/tyrosine kinase activity;GO:0004674//protein serine/threonine kinase activity;GO:0005524//ATP binding;GO:0004672//protein kinase activity	GO:0016480//negative regulation of transcription by RNA polymerase III;GO:0018105//peptidyl-serine phosphorylation;GO:0006468//protein phosphorylation;GO:0046777//protein autophosphorylation	K08287//dual-specificity kinase [EC:2.7.12.1]	NP_013081.1//serine/threonine protein kinase KNS1 [Saccharomyces cerevisiae S288C]
BK006939.2_ncrna_1579	369	15.8766	34.294	1.11106	0.0308835	Up	0.00577354	NA	NA	NA	NA	NA
BK006948.2_mrna_5876	369	165.322	39.0763	-2.08091	6.47e-10	Down	2.68e-11	GO:0016021//integral component of membrane	NA	NA	NA	NP_001335820.1//hypothetical protein YOR376W [Saccharomyces cerevisiae S288C]
BK006939.2_mrna_1741	1347	6229.67	3044.98	-1.03272	1.39e-06	Down	8.24e-08	GO:0000329//fungal-type vacuole membrane;GO:0000324//fungal-type vacuole;GO:0016021//integral component of membrane	GO:0005313//L-glutamate transmembrane transporter activity;GO:0015189//L-lysine transmembrane transporter activity;GO:0015183//L-aspartate transmembrane transporter activity;GO:0005290//L-histidine transmembrane transporter activity;GO:0061459//L-arginine transmembrane transporter activity;GO:0005302//L-tyrosine transmembrane transporter activity;GO:0015194//L-serine transmembrane transporter act…	GO:0055085//transmembrane transport;GO:0032974//amino acid transmembrane export from vacuole;GO:0003333//amino acid transmembrane transport	K14997//solute carrier family 38 (sodium-coupled neutral amino acid transporter), member 11	NP_011044.1//aspartate/glutamate transporter [Saccharomyces cerevisiae S288C]
BK006934.2_mrna_2759	651	489.51	1173.4	1.26128	3.25e-07	Up	1.74e-08	GO:0005622//intracellular	GO:0004845//uracil phosphoribosyltransferase activity;GO:0016301//kinase activity;GO:0005525//GTP binding	GO:0009116//nucleoside metabolic process;GO:0008655//pyrimidine-containing compound salvage;GO:0044206//UMP salvage	K00761//uracil phosphoribosyltransferase [EC:2.4.2.9]	AAA34611.1//uracil phosphoribosyltransferase (FUR1) [Saccharomyces cerevisiae]
BK006948.2_mrna_5735	324	3192.38	11372.9	1.83289	4.55e-20	Up	1.02e-21	GO:0005840//ribosome;GO:0022625//cytosolic large ribosomal subunit	GO:0003735//structural constituent of ribosome	GO:0006412//translation;GO:0002181//cytoplasmic translation;GO:0042273//ribosomal large subunit biogenesis	K02917//large subunit ribosomal protein L35Ae	NP_014877.3//ribosomal 60S subunit protein L33B [Saccharomyces cerevisiae S288C]
BK006939.2_mrna_1646	966	1745.31	3652.66	1.06547	1.34e-05	Up	9.04e-07	GO:0005634//nucleus;GO:0005737//cytoplasm	GO:0052642//lysophosphatidic acid phosphatase activity;GO:0016787//hydrolase activity;GO:0008252//nucleotidase activity	GO:0090549//response to carbon starvation;GO:0016036//cellular response to phosphate starvation;GO:0070328//triglyceride homeostasis;GO:0006206//pyrimidine nucleobase metabolic process;GO:0009166//nucleotide catabolic process	K07025//putative hydrolase of the HAD superfamily;K18551//pyrimidine and pyridine-specific 5'-nucleotidase [EC:3.1.3.-]	NP_010954.1//bifunctional nucleotidase/lysophosphatidic acid phosphatase [Saccharomyces cerevisiae S288C]
BK006941.2_mrna_2029	1149	1956.92	876.488	-1.15878	1.14e-07	Down	5.67e-09	GO:0005634//nucleus;GO:0005739//mitochondrion	GO:0000978//RNA polymerase II proximal promoter sequence-specific DNA binding;GO:0046872//metal ion binding;GO:0003676//nucleic acid binding;GO:0001227//DNA-binding transcription repressor activity, RNA polymerase II-specific	GO:0000122//negative regulation of transcription by RNA polymerase II;GO:0045944//positive regulation of transcription by RNA polymerase II;GO:1900436//positive regulation of filamentous growth of a population of unicellular organisms in response to starvation;GO:0005975//carbohydrate metabolic process;GO:0000433//carbon catabolite repression of transcription from RNA polymerase II promoter by gl…	K09467//zinc-finger protein CreA/MIG	NP_011306.1//Mig2p [Saccharomyces cerevisiae S288C]
BK006934.2_mrna_2642	249	1364.47	7565.79	2.47115	1.41e-24	Up	1.79e-26	GO:0005840//ribosome;GO:0022627//cytosolic small ribosomal subunit;GO:0005737//cytoplasm	GO:0046872//metal ion binding;GO:0003735//structural constituent of ribosome	GO:0000028//ribosomal small subunit assembly;GO:0000462//maturation of SSU-rRNA from tricistronic rRNA transcript (SSU-rRNA, 5.8S rRNA, LSU-rRNA);GO:0000479//endonucleolytic cleavage of tricistronic rRNA transcript (SSU-rRNA, 5.8S rRNA, LSU-rRNA);GO:0006412//translation;GO:0002181//cytoplasmic translation	K02978//small subunit ribosomal protein S27e	NP_011885.1//ribosomal 40S subunit protein S27B [Saccharomyces cerevisiae S288C]
BK006943.2_mrna_3446	678	6809.97	30218.7	2.14972	1.37e-22	Up	2.29e-24	GO:0030686//90S preribosome;GO:0022627//cytosolic small ribosomal subunit;GO:0015935//small ribosomal subunit	GO:0003723//RNA binding;GO:0003729//mRNA binding;GO:0003735//structural constituent of ribosome;GO:0019843//rRNA binding	GO:0000028//ribosomal small subunit assembly;GO:0006407//rRNA export from nucleus;GO:0006412//translation;GO:0002181//cytoplasmic translation;GO:0006450//regulation of translational fidelity	K02989//small subunit ribosomal protein S5e	NP_012657.1//ribosomal 40S subunit protein S5 [Saccharomyces cerevisiae S288C]
BK006945.2_mrna_4262	327	1125.51	4129.09	1.87525	2.93e-17	Up	7.94e-19	GO:0005840//ribosome;GO:0022627//cytosolic small ribosomal subunit	GO:0003735//structural constituent of ribosome	GO:0002181//cytoplasmic translation	K02975//small subunit ribosomal protein S25e	NP_013437.1//ribosomal 40S subunit protein S25B [Saccharomyces cerevisiae S288C]
BK006934.2_mrna_2843	786	2850.81	13078.2	2.19773	1.84e-25	Up	2.08e-27	GO:0005840//ribosome	GO:0016787//hydrolase activity;GO:0003735//structural constituent of ribosome;GO:0019843//rRNA binding	GO:0006412//translation;GO:0009166//nucleotide catabolic process	K02987//small subunit ribosomal protein S4e	XP_006685622.1//ribosomal protein S4e [Yamadazyma tenuis ATCC 10573]
BK006936.2_mrna_313	570	3853.1	16268.6	2.078	2.15e-20	Up	4.69e-22	GO:0022625//cytosolic large ribosomal subunit	GO:0003723//RNA binding;GO:0003735//structural constituent of ribosome	GO:0006412//translation;GO:0002181//cytoplasmic translation	K02885//large subunit ribosomal protein L19e	NP_009526.1//ribosomal 60S subunit protein L19B [Saccharomyces cerevisiae S288C]
BK006936.2_mrna_515	435	2915.46	803.223	-1.85985	2.52e-11	Down	9.24e-13	NA	NA	NA	NA	NP_009844.4//hypothetical protein YBR285W [Saccharomyces cerevisiae S288C]
BK006938.2_mrna_1083	2307	13194.8	6017.02	-1.13285	2.06e-13	Down	6.69e-15	GO:0000329//fungal-type vacuole membrane;GO:0016021//integral component of membrane	GO:0015174//basic amino acid transmembrane transporter activity	GO:0015802//basic amino acid transport;GO:0055085//transmembrane transport	K22134//MFS transporter, DHA2 family, glioxin efflux transporter	NP_010404.1//Vba4p [Saccharomyces cerevisiae S288C]
BK006939.2_mrna_1533	1908	20400.5	4456.91	-2.19449	4.06e-14	Down	1.29e-15	GO:0005615//extracellular space;GO:0000324//fungal-type vacuole;GO:0000328//fungal-type vacuole lumen	GO:0004252//serine-type endopeptidase activity	GO:0030435//sporulation resulting in formation of a cellular spore;GO:0007039//protein catabolic process in the vacuole;GO:0009267//cellular response to starvation	K01336//cerevisin [EC:3.4.21.48]	NP_010854.1//proteinase B [Saccharomyces cerevisiae S288C]
BK006941.2_mrna_2401	981	579.567	217.997	-1.41066	2.48e-05	Down	1.76e-06	GO:0005634//nucleus;GO:0005829//cytosol	GO:0046872//metal ion binding;GO:0008198//ferrous iron binding	GO:0009228//thiamine biosynthetic process;GO:0052837//thiazole biosynthetic process;GO:0000002//mitochondrial genome maintenance	K03146//cysteine-dependent adenosine diphosphate thiazole synthase [EC:2.4.2.60]	NP_011660.1//thiamine thiazole synthase [Saccharomyces cerevisiae S288C]
BK006938.2_mrna_831	321	888.555	4047.73	2.18758	2.96e-20	Up	6.53e-22	GO:0005840//ribosome;GO:0000324//fungal-type vacuole;GO:0022625//cytosolic large ribosomal subunit	GO:0030295//protein kinase activator activity;GO:0003735//structural constituent of ribosome;GO:0043021//ribonucleoprotein complex binding	GO:0045860//positive regulation of protein kinase activity;GO:0002181//cytoplasmic translation;GO:0006414//translational elongation	K02942//large subunit ribosomal protein LP1	NP_010153.1//ribosomal protein P1B [Saccharomyces cerevisiae S288C]
BK006938.2_mrna_773	363	2825.84	11954.9	2.08085	3.13e-22	Up	5.5e-24	GO:0005840//ribosome;GO:0022625//cytosolic large ribosomal subunit;GO:0030687//preribosome, large subunit precursor	GO:0003729//mRNA binding;GO:0003735//structural constituent of ribosome	GO:0006412//translation;GO:0002181//cytoplasmic translation;GO:0000463//maturation of LSU-rRNA from tricistronic rRNA transcript (SSU-rRNA, 5.8S rRNA, LSU-rRNA)	K02918//large subunit ribosomal protein L35e	NP_010090.1//ribosomal 60S subunit protein L35B [Saccharomyces cerevisiae S288C]
BK006948.2_mrna_5883	462	504.462	236.496	-1.09293	0.00332638	Down	0.000383021	GO:0009277//fungal-type cell wall	NA	GO:0015891//siderophore transport	K01183//chitinase [EC:3.2.1.14]	AHY77649.1//Fit2p [Saccharomyces cerevisiae YJM993]
BK006945.2_mrna_4376	567	176.427	77.3491	-1.18961	0.000190179	Down	1.59e-05	GO:0000795//synaptonemal complex	NA	GO:0016925//protein sumoylation;GO:0007131//reciprocal meiotic recombination;GO:0070193//synaptonemal complex organization;GO:0051321//meiotic cell cycle	NA	NP_013550.4//Gmc2p [Saccharomyces cerevisiae S288C]
BK006945.2_mrna_4277	897	11506	37409.6	1.70102	3.83e-22	Up	7.11e-24	GO:0005740//mitochondrial envelope;GO:0005743//mitochondrial inner membrane;GO:0016021//integral component of membrane;GO:0005739//mitochondrion	GO:0005310//dicarboxylic acid transmembrane transporter activity;GO:0015116//sulfate transmembrane transporter activity;GO:0015141//succinate transmembrane transporter activity;GO:0015131//oxaloacetate transmembrane transporter activity;GO:0015140//malate transmembrane transporter activity;GO:0015117//thiosulfate transmembrane transporter activity;GO:0015297//antiporter activity;GO:0022857//trans…	GO:0015729//oxaloacetate transport;GO:0071423//malate transmembrane transport;GO:0006835//dicarboxylic acid transport;GO:0015709//thiosulfate transport;GO:0008272//sulfate transport;GO:0071422//succinate transmembrane transport;GO:0035435//phosphate ion transmembrane transport	K13577//solute carrier family 25 (mitochondrial dicarboxylate transporter), member 10	NP_013452.1//Dic1p [Saccharomyces cerevisiae S288C]
BK006938.2_mrna_1207	1650	22002.3	6426.62	-1.77552	1.88e-42	Down	6.91e-45	NA	GO:0043864//indoleacetamide hydrolase activity;GO:0004040//amidase activity	NA	K01426//amidase [EC:3.5.1.4]	NP_010528.3//putative amidase [Saccharomyces cerevisiae S288C]
BK006949.2_mrna_6121	1503	32964.9	13443.5	-1.29402	1.35e-07	Down	6.74e-09	GO:0005829//cytosol;GO:0005739//mitochondrion	GO:0016620//oxidoreductase activity, acting on the aldehyde or oxo group of donors, NAD or NADP as acceptor;GO:0033721//aldehyde dehydrogenase (NADP+) activity;GO:0043878//glyceraldehyde-3-phosphate dehydrogenase (NAD+) (non-phosphorylating) activity;GO:0004030//aldehyde dehydrogenase [NAD(P)+] activity;GO:0004029//aldehyde dehydrogenase (NAD) activity	GO:0006740//NADPH regeneration;GO:0019413//acetate biosynthetic process;GO:0009651//response to salt stress;GO:0006068//ethanol catabolic process	K00128//aldehyde dehydrogenase (NAD+) [EC:1.2.1.3]	NP_015264.1//aldehyde dehydrogenase (NADP(+)) ALD6 [Saccharomyces cerevisiae S288C]
BK006947.3_mrna_5139	663	838.664	308.367	-1.44345	1.12e-08	Down	5.04e-10	GO:0005768//endosome;GO:0005770//late endosome;GO:0030139//endocytic vesicle;GO:0005829//cytosol;GO:0005886//plasma membrane;GO:0005769//early endosome	GO:0005525//GTP binding;GO:0003924//GTPase activity	GO:0006886//intracellular protein transport;GO:0006623//protein targeting to vacuole;GO:0006895//Golgi to endosome transport;GO:0032482//Rab protein signal transduction;GO:0006897//endocytosis	K07976//Rab family, other;K07889//Ras-related protein Rab-5C	NP_014306.3//Rab family GTPase YPT53 [Saccharomyces cerevisiae S288C]
BK006941.2_mrna_2166	735	3271.28	11783.1	1.84879	9.18e-17	Up	2.5e-18	GO:0005840//ribosome;GO:0005730//nucleolus;GO:0022625//cytosolic large ribosomal subunit;GO:0005737//cytoplasm	GO:0003735//structural constituent of ribosome	GO:0000470//maturation of LSU-rRNA;GO:0002181//cytoplasmic translation;GO:0000463//maturation of LSU-rRNA from tricistronic rRNA transcript (SSU-rRNA, 5.8S rRNA, LSU-rRNA);GO:0042273//ribosomal large subunit biogenesis	K02937//large subunit ribosomal protein L7e	NP_011439.1//ribosomal 60S subunit protein L7A [Saccharomyces cerevisiae S288C]
BK006945.2_mrna_3946	2175	1350.59	198.462	-2.76666	1.56e-14	Down	4.79e-16	GO:0016021//integral component of membrane;GO:0005737//cytoplasm;GO:0005628//prospore membrane	NA	GO:0030476//ascospore wall assembly	NA	NP_013155.2//Osw2p [Saccharomyces cerevisiae S288C]
BK006946.2_mrna_4458	531	2416.54	9508.12	1.97622	3.18e-20	Up	7.09e-22	GO:0005840//ribosome;GO:0022625//cytosolic large ribosomal subunit	GO:0003723//RNA binding;GO:0003735//structural constituent of ribosome	GO:0006412//translation;GO:0000027//ribosomal large subunit assembly;GO:0002181//cytoplasmic translation	K02934//large subunit ribosomal protein L6e	NP_013638.1//ribosomal 60S subunit protein L6A [Saccharomyces cerevisiae S288C]
BK006943.2_mrna_3204	5310	3648.6	1301.65	-1.487	6.42e-12	Down	2.31e-13	GO:0033553//rDNA heterochromatin;GO:0005654//nucleoplasm;GO:0030686//90S preribosome;GO:0005730//nucleolus;GO:0032040//small-subunit processome;GO:0016021//integral component of membrane;GO:0030688//preribosome, small subunit precursor;GO:0005739//mitochondrion;GO:0034455//t-UTP complex	GO:0030515//snoRNA binding	GO:0031167//rRNA methylation;GO:0000462//maturation of SSU-rRNA from tricistronic rRNA transcript (SSU-rRNA, 5.8S rRNA, LSU-rRNA);GO:0000472//endonucleolytic cleavage to generate mature 5'-end of SSU-rRNA from (SSU-rRNA, 5.8S rRNA, LSU-rRNA);GO:0045943//positive regulation of transcription by RNA polymerase I;GO:0000447//endonucleolytic cleavage in ITS1 to separate SSU-rRNA from 5.8S rRNA and LSU…	K14550//U3 small nucleolar RNA-associated protein 10	NP_012426.1//snoRNA-binding rRNA-processing protein UTP10 [Saccharomyces cerevisiae S288C]
BK006941.2_mrna_2557	363	19.3331	41.9945	1.11913	0.0401453	Up	0.00827765	GO:0009277//fungal-type cell wall;GO:0016021//integral component of membrane	GO:0005199//structural constituent of cell wall	GO:0031505//fungal-type cell wall organization	NA	NP_011810.1//seripauperin PAU12 [Saccharomyces cerevisiae S288C]
BK006949.2_mrna_6385	330	215.46	97.6517	-1.1417	0.00282693	Down	0.000319834	NA	NA	NA	NA	NP_001335827.1//hypothetical protein YPR195C [Saccharomyces cerevisiae S288C]
BK006936.2_mrna_415	588	1753.14	9774.32	2.47905	7.12e-37	Up	3.58e-39	GO:0005654//nucleoplasm;GO:0030686//90S preribosome;GO:0032040//small-subunit processome;GO:0005730//nucleolus;GO:0022627//cytosolic small ribosomal subunit;GO:0015935//small ribosomal subunit;GO:0005737//cytoplasm	GO:0003735//structural constituent of ribosome;GO:0019843//rRNA binding	GO:0031167//rRNA methylation;GO:0000462//maturation of SSU-rRNA from tricistronic rRNA transcript (SSU-rRNA, 5.8S rRNA, LSU-rRNA);GO:0006412//translation;GO:0002181//cytoplasmic translation;GO:0045903//positive regulation of translational fidelity	K02997//small subunit ribosomal protein S9e	NP_009748.3//ribosomal 40S subunit protein S9B [Saccharomyces cerevisiae S288C]
BK006949.2_mrna_6250	882	6608.32	3078.52	-1.10205	5.67e-12	Down	2.02e-13	GO:0005634//nucleus;GO:0005737//cytoplasm	GO:0004766//spermidine synthase activity;GO:0016740//transferase activity	GO:0015940//pantothenate biosynthetic process;GO:0008295//spermidine biosynthetic process;GO:0006596//polyamine biosynthetic process	K00797//spermidine synthase [EC:2.5.1.16]	NP_015394.1//spermidine synthase [Saccharomyces cerevisiae S288C]
BK006945.2_mrna_4273	384	3127.24	7635.04	1.28774	3.06e-10	Up	1.23e-11	GO:0015934//large ribosomal subunit;GO:0022625//cytosolic large ribosomal subunit	GO:0003723//RNA binding;GO:0003735//structural constituent of ribosome	GO:0006412//translation;GO:0002181//cytoplasmic translation;GO:0042273//ribosomal large subunit biogenesis	K02898//large subunit ribosomal protein L26e	NP_013448.1//ribosomal 60S subunit protein L26A [Saccharomyces cerevisiae S288C]
BK006936.2_mrna_436	5508	59380.8	2740.47	-4.4375	6.36e-69	Down	1.38e-71	GO:0005737//cytoplasm	GO:0046872//metal ion binding;GO:0005524//ATP binding;GO:0004847//urea carboxylase activity;GO:0004039//allophanate hydrolase activity;GO:0016874//ligase activity	GO:0006525//arginine metabolic process;GO:0043419//urea catabolic process;GO:0000256//allantoin catabolic process	K14541//urea carboxylase / allophanate hydrolase [EC:6.3.4.6 3.5.1.54]	NP_009767.1//bifunctional urea carboxylase/allophanate hydrolase [Saccharomyces cerevisiae S288C]
BK006941.2_mrna_2502	1200	4878.85	14114.4	1.53255	1.82e-16	Up	5.09e-18	GO:0005759//mitochondrial matrix;GO:0010494//cytoplasmic stress granule;GO:0005634//nucleus;GO:0005829//cytosol;GO:0005739//mitochondrion;GO:0005737//cytoplasm	GO:0046872//metal ion binding;GO:0020037//heme binding;GO:0019825//oxygen binding;GO:0016966//nitric oxide reductase activity;GO:0008941//nitric oxide dioxygenase activity;GO:0071949//FAD binding	GO:0051409//response to nitrosative stress;GO:0034599//cellular response to oxidative stress;GO:0071500//cellular response to nitrosative stress;GO:0046210//nitric oxide catabolic process;GO:0071218//cellular response to misfolded protein;GO:0009636//response to toxic substance;GO:1902170//cellular response to reactive nitrogen species	K05916//nitric oxide dioxygenase [EC:1.14.12.17]	NP_011750.1//flavohemoglobin [Saccharomyces cerevisiae S288C]
BK006943.2_mrna_3176	264	1920.6	9262.37	2.26983	3.86e-25	Up	4.58e-27	GO:0005840//ribosome;GO:0022627//cytosolic small ribosomal subunit	GO:0003735//structural constituent of ribosome	GO:0006412//translation;GO:0000461//endonucleolytic cleavage to generate mature 3'-end of SSU-rRNA from (SSU-rRNA, 5.8S rRNA, LSU-rRNA);GO:0002181//cytoplasmic translation;GO:0000447//endonucleolytic cleavage in ITS1 to separate SSU-rRNA from 5.8S rRNA and LSU-rRNA from tricistronic rRNA transcript (SSU-rRNA, 5.8S rRNA, LSU-rRNA);GO:0006364//rRNA processing	K02971//small subunit ribosomal protein S21e	NP_012399.1//ribosomal 40S subunit protein S21B [Saccharomyces cerevisiae S288C]
BK006938.2_mrna_1424	441	2593.4	11862	2.19343	1.45e-24	Up	1.86e-26	GO:0005840//ribosome;GO:0005829//cytosol;GO:0005739//mitochondrion;GO:0022627//cytosolic small ribosomal subunit;GO:0005737//cytoplasm	GO:0003723//RNA binding;GO:0003735//structural constituent of ribosome;GO:0019843//rRNA binding	GO:0006407//rRNA export from nucleus;GO:0006412//translation;GO:0002181//cytoplasmic translation;GO:0000447//endonucleolytic cleavage in ITS1 to separate SSU-rRNA from 5.8S rRNA and LSU-rRNA from tricistronic rRNA transcript (SSU-rRNA, 5.8S rRNA, LSU-rRNA)	K02964//small subunit ribosomal protein S18e	NP_010738.1//ribosomal 40S subunit protein S18A [Saccharomyces cerevisiae S288C]
BK006948.2_mrna_5786	450	4307.63	1977.51	-1.12321	1.19e-17	Down	3.13e-19	GO:0005739//mitochondrion	GO:0004792//thiosulfate sulfurtransferase activity	NA	K01013//thiosulfate:glutathione sulfurtransferase [EC:2.8.1.-];K17970//mitochondrial division protein 1	NP_014929.3//thiosulfate sulfurtransferase RDL2 [Saccharomyces cerevisiae S288C]
BK006941.2_mrna_2053	360	5672.62	25502.5	2.16855	3.38e-24	Up	4.59e-26	GO:0005840//ribosome;GO:0022627//cytosolic small ribosomal subunit	GO:0003729//mRNA binding;GO:0003735//structural constituent of ribosome	GO:0006407//rRNA export from nucleus;GO:0006412//translation;GO:0002181//cytoplasmic translation;GO:0042255//ribosome assembly	K02976//small subunit ribosomal protein S26e	NP_011326.1//ribosomal 40S subunit protein S26A [Saccharomyces cerevisiae S288C]
BK006944.2_mrna_3710	417	1290.36	7306.4	2.50139	5.77e-28	Up	5.02e-30	GO:0005840//ribosome;GO:0022625//cytosolic large ribosomal subunit	GO:0003723//RNA binding;GO:0003735//structural constituent of ribosome	GO:0006412//translation;GO:0002181//cytoplasmic translation;GO:0042273//ribosomal large subunit biogenesis;GO:0016236//macroautophagy	K02875//large subunit ribosomal protein L14e	NP_012920.1//ribosomal 60S subunit protein L14A [Saccharomyces cerevisiae S288C]
BK006942.2_mrna_3094	711	7084.12	1655.54	-2.09729	3.03e-46	Down	8.61e-49	NA	GO:0008999//ribosomal-protein-alanine N-acetyltransferase activity;GO:1990189//peptide-serine-N-acetyltransferase activity	GO:0017198//N-terminal peptidyl-serine acetylation	NA	NP_012308.1//hypothetical protein YIR042C [Saccharomyces cerevisiae S288C]
BK006945.2_mrna_4317	171	520.919	2637.78	2.34019	1.67e-23	Up	2.54e-25	GO:0005840//ribosome;GO:0022627//cytosolic small ribosomal subunit	GO:0008270//zinc ion binding;GO:0003735//structural constituent of ribosome	GO:0006412//translation;GO:0002181//cytoplasmic translation	K02980//small subunit ribosomal protein S29e	NP_013492.3//ribosomal 40S subunit protein S29A [Saccharomyces cerevisiae S288C]
BK006938.2_mrna_979	471	1996.67	9376.77	2.23149	4.24e-26	Up	4.55e-28	GO:0005840//ribosome;GO:0030686//90S preribosome;GO:0022627//cytosolic small ribosomal subunit	GO:0003735//structural constituent of ribosome;GO:0019843//rRNA binding	GO:0000028//ribosomal small subunit assembly;GO:0000462//maturation of SSU-rRNA from tricistronic rRNA transcript (SSU-rRNA, 5.8S rRNA, LSU-rRNA);GO:0006412//translation;GO:0002181//cytoplasmic translation	K02949//small subunit ribosomal protein S11e	NP_009604.1//ribosomal 40S subunit protein S11B [Saccharomyces cerevisiae S288C]
BK006945.2_mrna_4017	756	2102.39	638.89	-1.71839	6.15e-25	Down	7.72e-27	GO:0005634//nucleus;GO:0034399//nuclear periphery;GO:0005829//cytosol;GO:0005737//cytoplasm	GO:0016740//transferase activity	GO:0006541//glutamine metabolic process;GO:0006879//cellular iron ion homeostasis;GO:0006878//cellular copper ion homeostasis	K01951//GMP synthase (glutamine-hydrolysing) [EC:6.3.5.2];K22314//glucosinolate gamma-glutamyl hydrolase [EC:3.4.19.16]	NP_013227.1//putative amidotransferase [Saccharomyces cerevisiae S288C]
BK006948.2_mrna_5365	435	1435.12	5055.08	1.81656	6.77e-19	Up	1.65e-20	GO:0005840//ribosome;GO:0022627//cytosolic small ribosomal subunit	GO:0003735//structural constituent of ribosome	GO:0000028//ribosomal small subunit assembly;GO:0006407//rRNA export from nucleus;GO:0006412//translation;GO:0002181//cytoplasmic translation;GO:0042274//ribosomal small subunit biogenesis	K02966//small subunit ribosomal protein S19e	NP_014520.1//ribosomal 40S subunit protein S19A [Saccharomyces cerevisiae S288C]
BK006945.2_mrna_3964	603	160.001	411.469	1.3627	7.27e-05	Up	5.58e-06	GO:0016020//membrane;GO:0005768//endosome	GO:0061578//Lys63-specific deubiquitinase activity;GO:0004843//thiol-dependent ubiquitin-specific protease activity;GO:0004857//enzyme inhibitor activity;GO:0004869//cysteine-type endopeptidase inhibitor activity	GO:0010992//ubiquitin recycling;GO:0016579//protein deubiquitination;GO:0070536//protein K63-linked deubiquitination	K11866//STAM-binding protein [EC:3.4.19.12]	NP_013174.1//Rfu1p [Saccharomyces cerevisiae S288C]
BK006936.2_mrna_517	1284	13460.7	5595.24	-1.26649	6.96e-16	Down	2e-17	GO:0005783//endoplasmic reticulum;GO:0016021//integral component of membrane	NA	GO:0055085//transmembrane transport	K07088//uncharacterized protein;K00866//choline kinase [EC:2.7.1.32]	NP_009846.1//hypothetical protein YBR287W [Saccharomyces cerevisiae S288C]
BK006936.2_mrna_531	1755	448.907	186.089	-1.27042	3.72e-06	Down	2.35e-07	GO:0005886//plasma membrane	GO:0032450//maltose alpha-glucosidase activity;GO:0004556//alpha-amylase activity;GO:0004575//sucrose alpha-glucosidase activity;GO:0003824//catalytic activity;GO:0004558//alpha-1,4-glucosidase activity;GO:0033934//glucan 1,4-alpha-maltotriohydrolase activity;GO:0004574//oligo-1,6-glucosidase activity	GO:0009313//oligosaccharide catabolic process;GO:0046352//disaccharide catabolic process;GO:0005975//carbohydrate metabolic process;GO:0005987//sucrose catabolic process;GO:0000025//maltose catabolic process	K01182//oligo-1,6-glucosidase [EC:3.2.1.10]	NP_009858.3//alpha-glucosidase MAL32 [Saccharomyces cerevisiae S288C]
BK006941.2_mrna_2136	450	4477.46	18118.6	2.01672	1.79e-19	Up	4.17e-21	GO:0005634//nucleus;GO:0015934//large ribosomal subunit;GO:0022625//cytosolic large ribosomal subunit	GO:0003723//RNA binding;GO:0003735//structural constituent of ribosome	GO:0006412//translation;GO:0002181//cytoplasmic translation	K02900//large subunit ribosomal protein L27Ae	NP_011412.1//ribosomal 60S subunit protein L28 [Saccharomyces cerevisiae S288C]
BK006949.2_mrna_5933	303	1594.54	6908.15	2.11516	8.41e-20	Up	1.94e-21	GO:0005840//ribosome;GO:0022625//cytosolic large ribosomal subunit	GO:0003723//RNA binding;GO:0003735//structural constituent of ribosome	GO:0006412//translation;GO:0002181//cytoplasmic translation	K02920//large subunit ribosomal protein L36e	P0C5S0.1//RecName: Full=Putative uncharacterized protein YPL250W-A
BK006939.2_mrna_1524	1695	223.002	100.319	-1.15246	0.000687027	Down	6.4e-05	GO:0016021//integral component of membrane	GO:0022857//transmembrane transporter activity	NA	K08139//MFS transporter, SP family, sugar:H+ symporter	AJU51082.2//Hxt13p [Saccharomyces cerevisiae YJM1401]
BK006936.2_mrna_312	2928	746.163	1732.85	1.21559	4.16e-09	Up	1.8e-10	GO:0005739//mitochondrion;GO:0005737//cytoplasm	GO:0004488//methylenetetrahydrofolate dehydrogenase (NADP+) activity;GO:0004477//methenyltetrahydrofolate cyclohydrolase activity;GO:0005524//ATP binding;GO:0004329//formate-tetrahydrofolate ligase activity	GO:0009113//purine nucleobase biosynthetic process;GO:0046656//folic acid biosynthetic process;GO:0006139//nucleobase-containing compound metabolic process;GO:0000105//histidine biosynthetic process;GO:0006164//purine nucleotide biosynthetic process;GO:0009257//10-formyltetrahydrofolate biosynthetic process;GO:0035999//tetrahydrofolate interconversion;GO:0009086//methionine biosynthetic process	K00288//methylenetetrahydrofolate dehydrogenase (NADP+) / methenyltetrahydrofolate cyclohydrolase / formyltetrahydrofolate synthetase [EC:1.5.1.5 3.5.4.9 6.3.4.3]	NP_009640.1//trifunctional formate-tetrahydrofolate ligase/methenyltetrahydrofolate cyclohydrolase/methylenetetrahydrofolate dehydrogenase MIS1 [Saccharomyces cerevisiae S288C]
BK006935.2_mrna_9	3969	1126.06	534.355	-1.07541	5.66e-05	Down	4.28e-06	GO:0009277//fungal-type cell wall;GO:0005576//extracellular region;GO:0071944//cell periphery;GO:0005886//plasma membrane;GO:0031225//anchored component of membrane	GO:0005537//mannose binding	GO:0071361//cellular response to ethanol;GO:0036281//coflocculation;GO:0000128//flocculation;GO:0031589//cell-substrate adhesion;GO:0034605//cellular response to heat;GO:0000501//flocculation via cell wall protein-carbohydrate interaction;GO:0070301//cellular response to hydrogen peroxide	K22493//agglutinin-like protein	NP_009338.1//flocculin FLO9 [Saccharomyces cerevisiae S288C]
BK006941.2_mrna_2085	3252	5833.43	2835.75	-1.04062	8.94e-07	Down	5.1e-08	GO:0000329//fungal-type vacuole membrane;GO:0034270//Cvt complex	GO:0046872//metal ion binding;GO:0030246//carbohydrate binding;GO:0004559//alpha-mannosidase activity	GO:0009313//oligosaccharide catabolic process;GO:0006013//mannose metabolic process;GO:0019309//mannose catabolic process;GO:0044262//cellular carbohydrate metabolic process	K01191//alpha-mannosidase [EC:3.2.1.24]	NP_011359.1//alpha-mannosidase [Saccharomyces cerevisiae S288C]
BK006938.2_mrna_1327	954	4862.56	2097.6	-1.21298	2.65e-13	Down	8.77e-15	GO:0000329//fungal-type vacuole membrane;GO:0071627//integral component of fungal-type vacuolar membrane;GO:0016021//integral component of membrane	GO:0015174//basic amino acid transmembrane transporter activity	GO:0034488//basic amino acid transmembrane export from vacuole	K12386//cystinosin	NP_010639.1//Ypq2p [Saccharomyces cerevisiae S288C]
BK006945.2_mrna_4093	459	5561.5	31815.7	2.51619	1.62e-38	Up	7.32e-41	GO:0005840//ribosome;GO:0005634//nucleus;GO:0022627//cytosolic small ribosomal subunit;GO:0005737//cytoplasm	GO:0031386//protein tag;GO:0046872//metal ion binding;GO:0031625//ubiquitin protein ligase binding;GO:0003735//structural constituent of ribosome	GO:0042254//ribosome biogenesis;GO:0000028//ribosomal small subunit assembly;GO:0006412//translation;GO:0016567//protein ubiquitination;GO:0002181//cytoplasmic translation;GO:0019941//modification-dependent protein catabolic process;GO:0002109//maturation of SSU-rRNA from tricistronic rRNA transcript (SSU-rRNA, LSU-rRNA,5S)	K02977//small subunit ribosomal protein S27Ae	NP_013268.1//ubiquitin-ribosomal 40S subunit protein S31 fusion protein [Saccharomyces cerevisiae S288C]
BK006939.2_mrna_1692	408	1926.2	8709.91	2.1769	2.35e-26	Up	2.4e-28	GO:0005840//ribosome;GO:0005739//mitochondrion;GO:0022627//cytosolic small ribosomal subunit	GO:0003735//structural constituent of ribosome	GO:0000462//maturation of SSU-rRNA from tricistronic rRNA transcript (SSU-rRNA, 5.8S rRNA, LSU-rRNA);GO:0006412//translation;GO:0002181//cytoplasmic translation	K02974//small subunit ribosomal protein S24e	NP_012195.1//ribosomal 40S subunit protein S24B [Saccharomyces cerevisiae S288C]
BK006940.2_mrna_1846	1398	181.837	48.3914	-1.90982	1.02e-10	Down	3.91e-12	GO:0005634//nucleus	GO:0003677//DNA binding;GO:0000981//DNA-binding transcription factor activity, RNA polymerase II-specific;GO:0001228//DNA-binding transcription activator activity, RNA polymerase II-specific;GO:0008270//zinc ion binding;GO:0001012//RNA polymerase II regulatory region DNA binding	GO:0061410//positive regulation of transcription from RNA polymerase II promoter in response to ethanol	K01182//oligo-1,6-glucosidase [EC:3.2.1.10];K21450//arabinolytic transcriptional activator AraR;K08141//MFS transporter, SP family, general alpha glucoside:H+ symporter	NP_116603.1//DNA-binding domain containing protein [Saccharomyces cerevisiae S288C]
